# Supplementary material
Source: PubMed Central journal article supplement (PMC3457064)

*Supporting Information for*

**Cycloartane Glycosides from *Sutherlandia frutescens***

Xiang Fu,<sup>†</sup> Xing-Cong Li,<sup>‡</sup> Troy A. Smillie,<sup>‡</sup> Paulo Carvalho,<sup>§</sup> Wilfred Mabusela,<sup>⊥</sup> James Syce,<sup>⊥</sup> Quinton Johnson,<sup>⊥</sup> William Folk,<sup>||</sup> Mitchell A. Avery<sup>‡, §, ∇</sup> and Ikhlas A. Khan<sup>\*, †, ‡</sup>

*Department of Pharmacognosy, National Center for Natural Products Research,  
Department of Medicinal Chemistry, School of Pharmacy, Department of Chemistry and  
Biochemistry, The University of Mississippi, University, MS 38677, USA. South African  
Herbal Sciences and Medicines Institute, University of the Western Cape, Bellville 7535,  
South Africa. School of Medicine, University of Missouri-Columbia, Columbia, MO  
65211-7020, USA*

**S1-2.** ORTEP projection, key HMBC and NOE correlations of sutherlandioside A (1)

**S2.** Key HMBC and ROESY correlations of sutherlandioside B (2)

**S3-10.** NMR spectra of sutherlandioside A (1)

**S11-18.** NMR spectra of sutherlandioside B (2)

**S19-20.** NMR spectra of sutherlandioside C (3)

**S21-26.** NMR spectra of sutherlandioside D (4)

**S27-30.** NMR spectra of compound 8

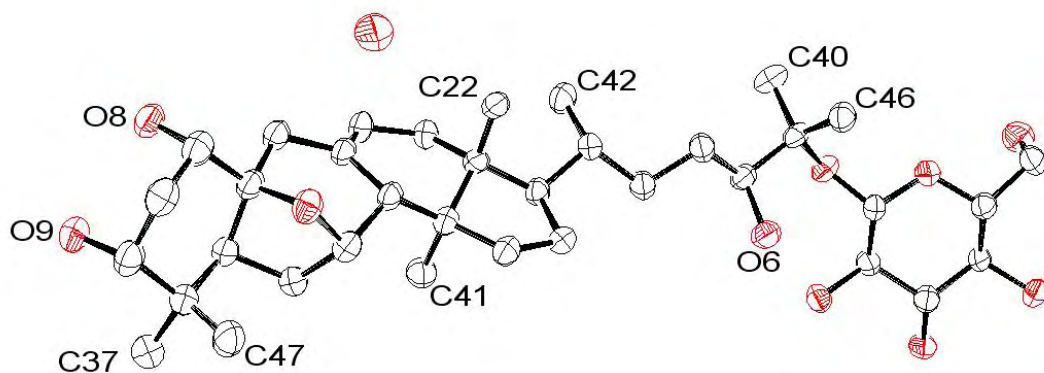

**Figure S1** ORTEP projection of Sutherlandioside A (**1**)

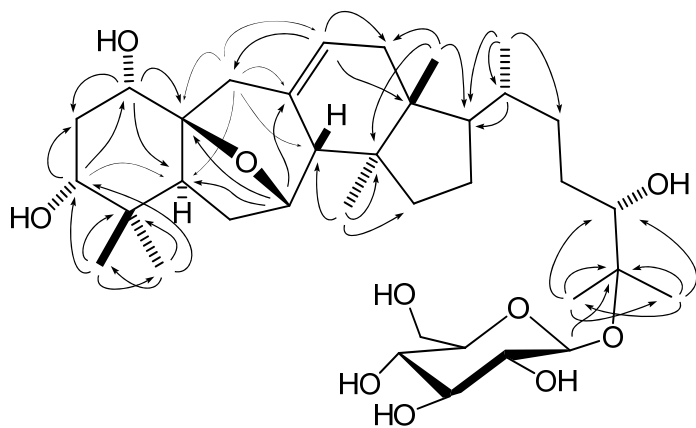

**Figure S2** Key HMBC correlations of **1**.

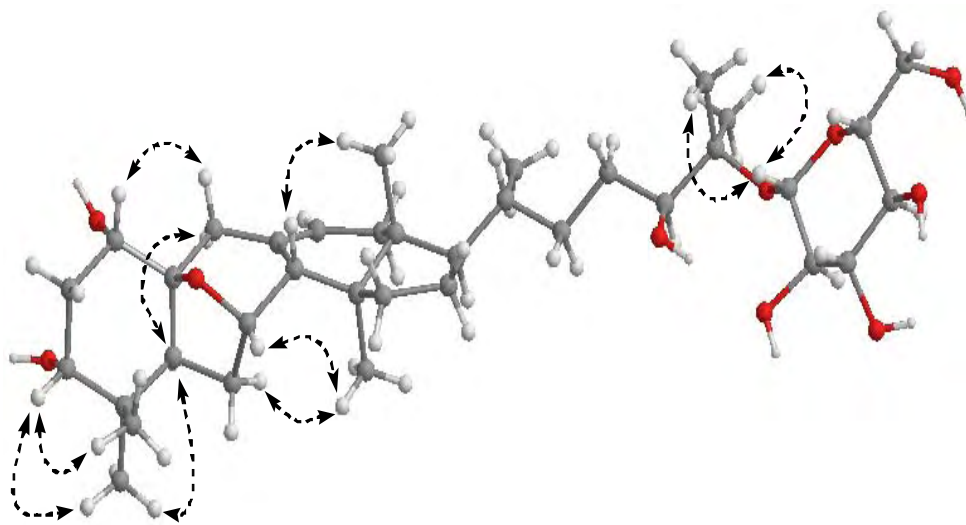

**Figure S3** Key NOE correlations of **1** with the conformation from X-ray crystallography.

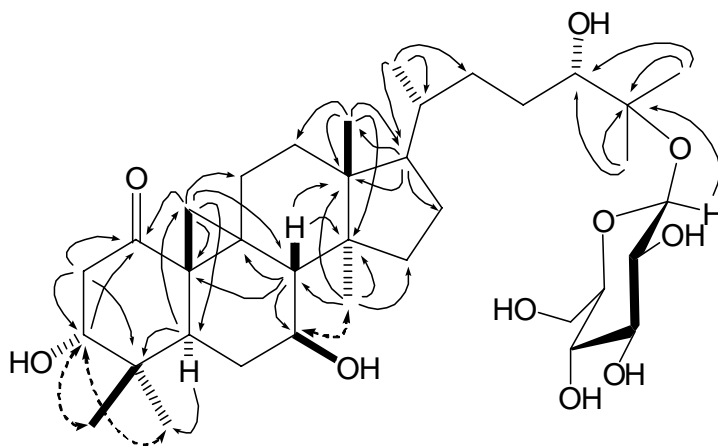

**Figure S4** Key HMBC (—) and ROESY correlations (⋯) of **2**.

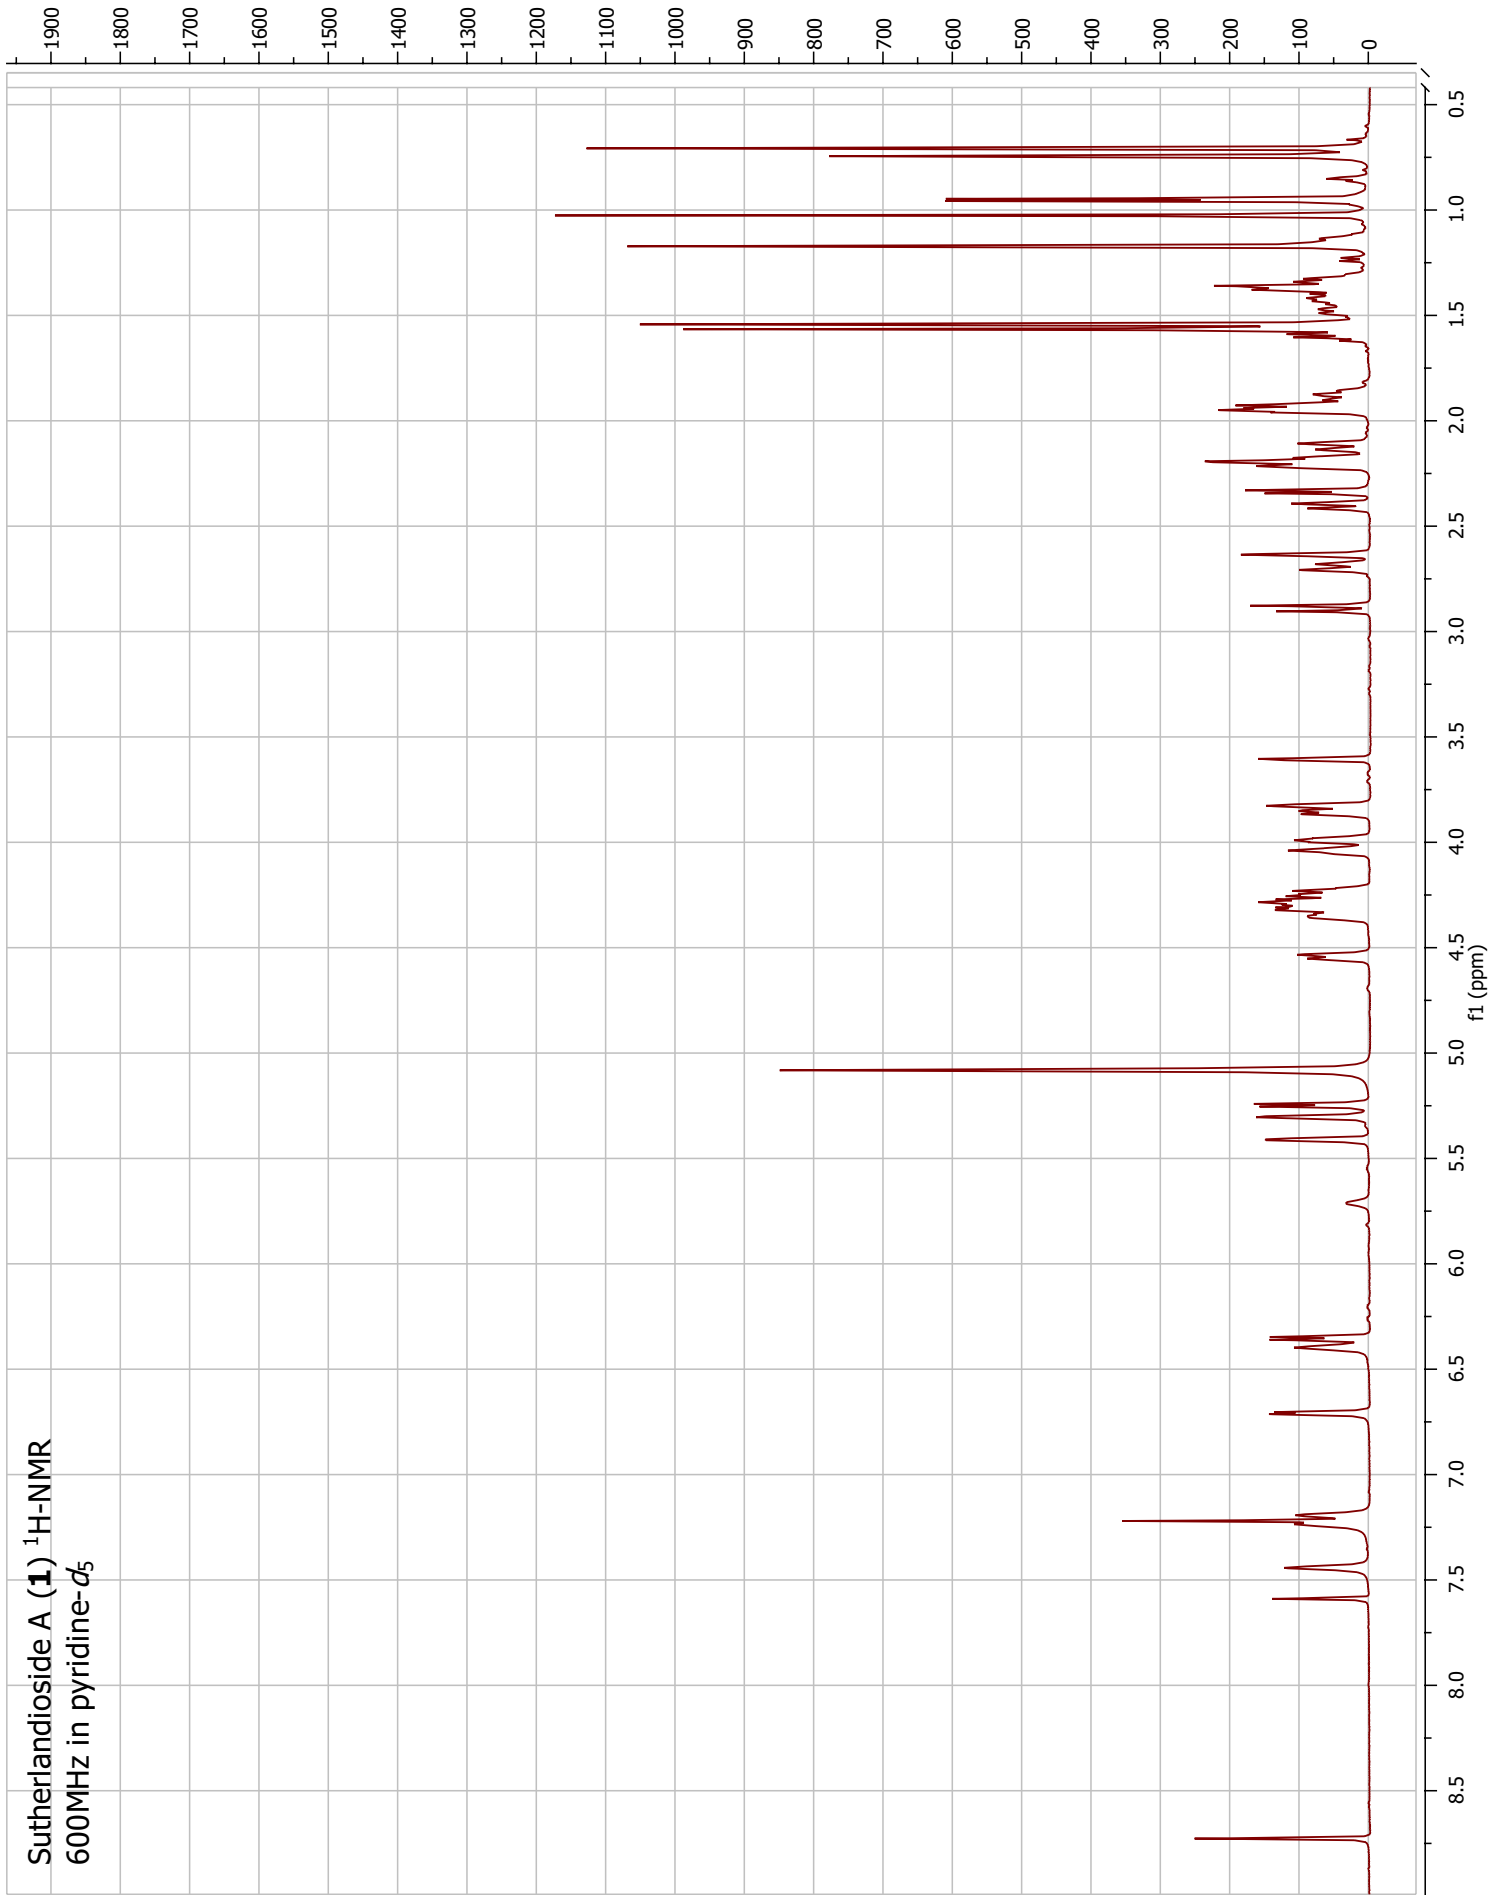

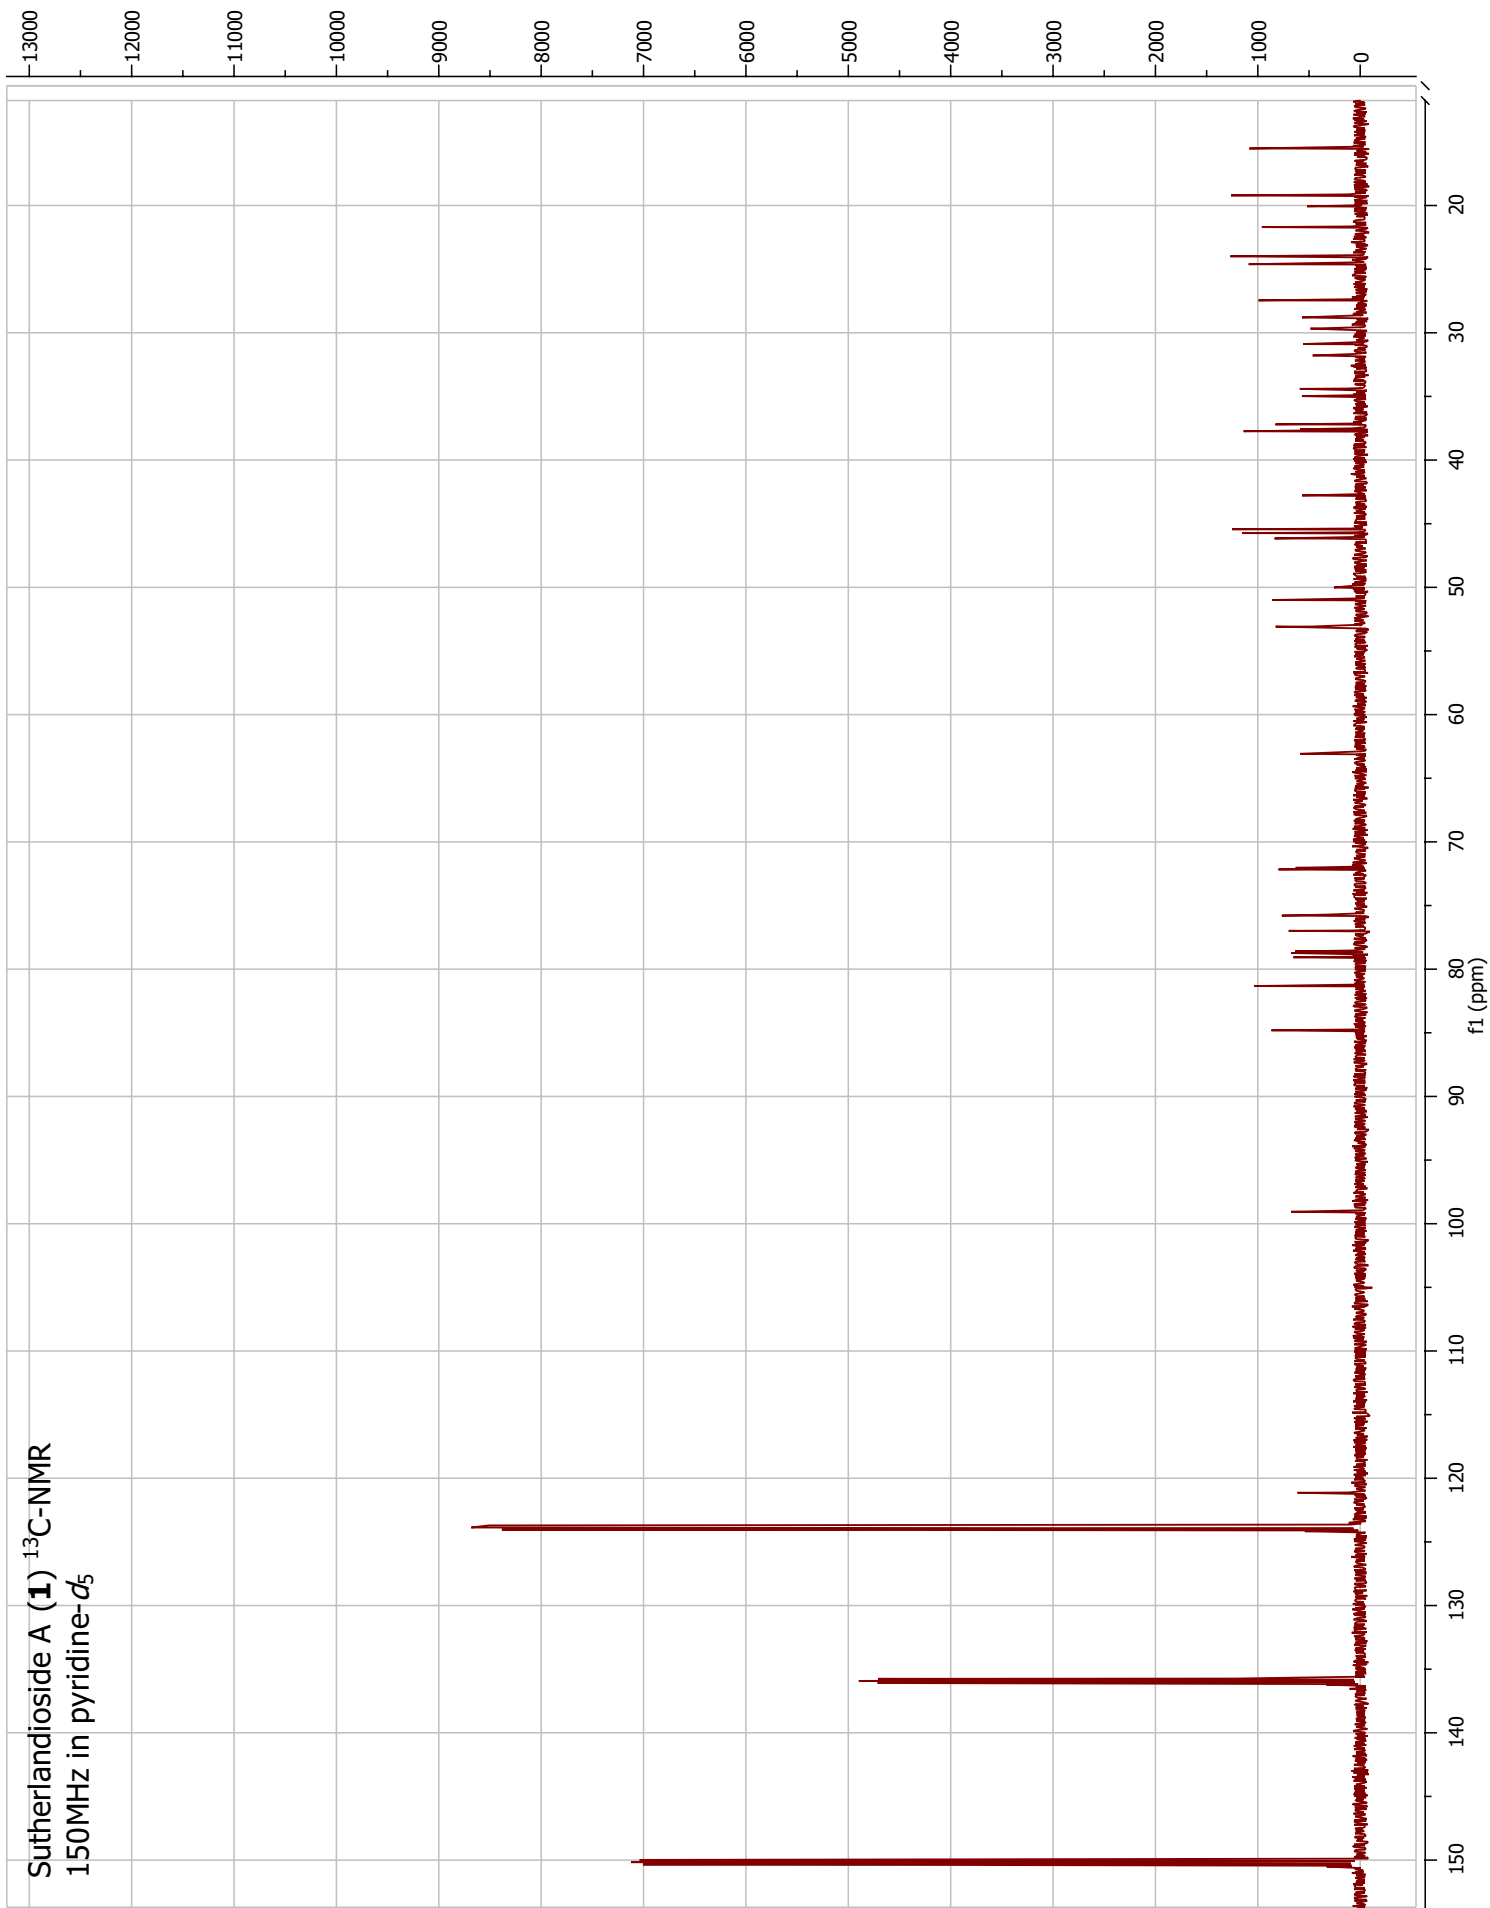

Sutherlandioside A (**1**) COSY spectrum in pyridine- $d_5$

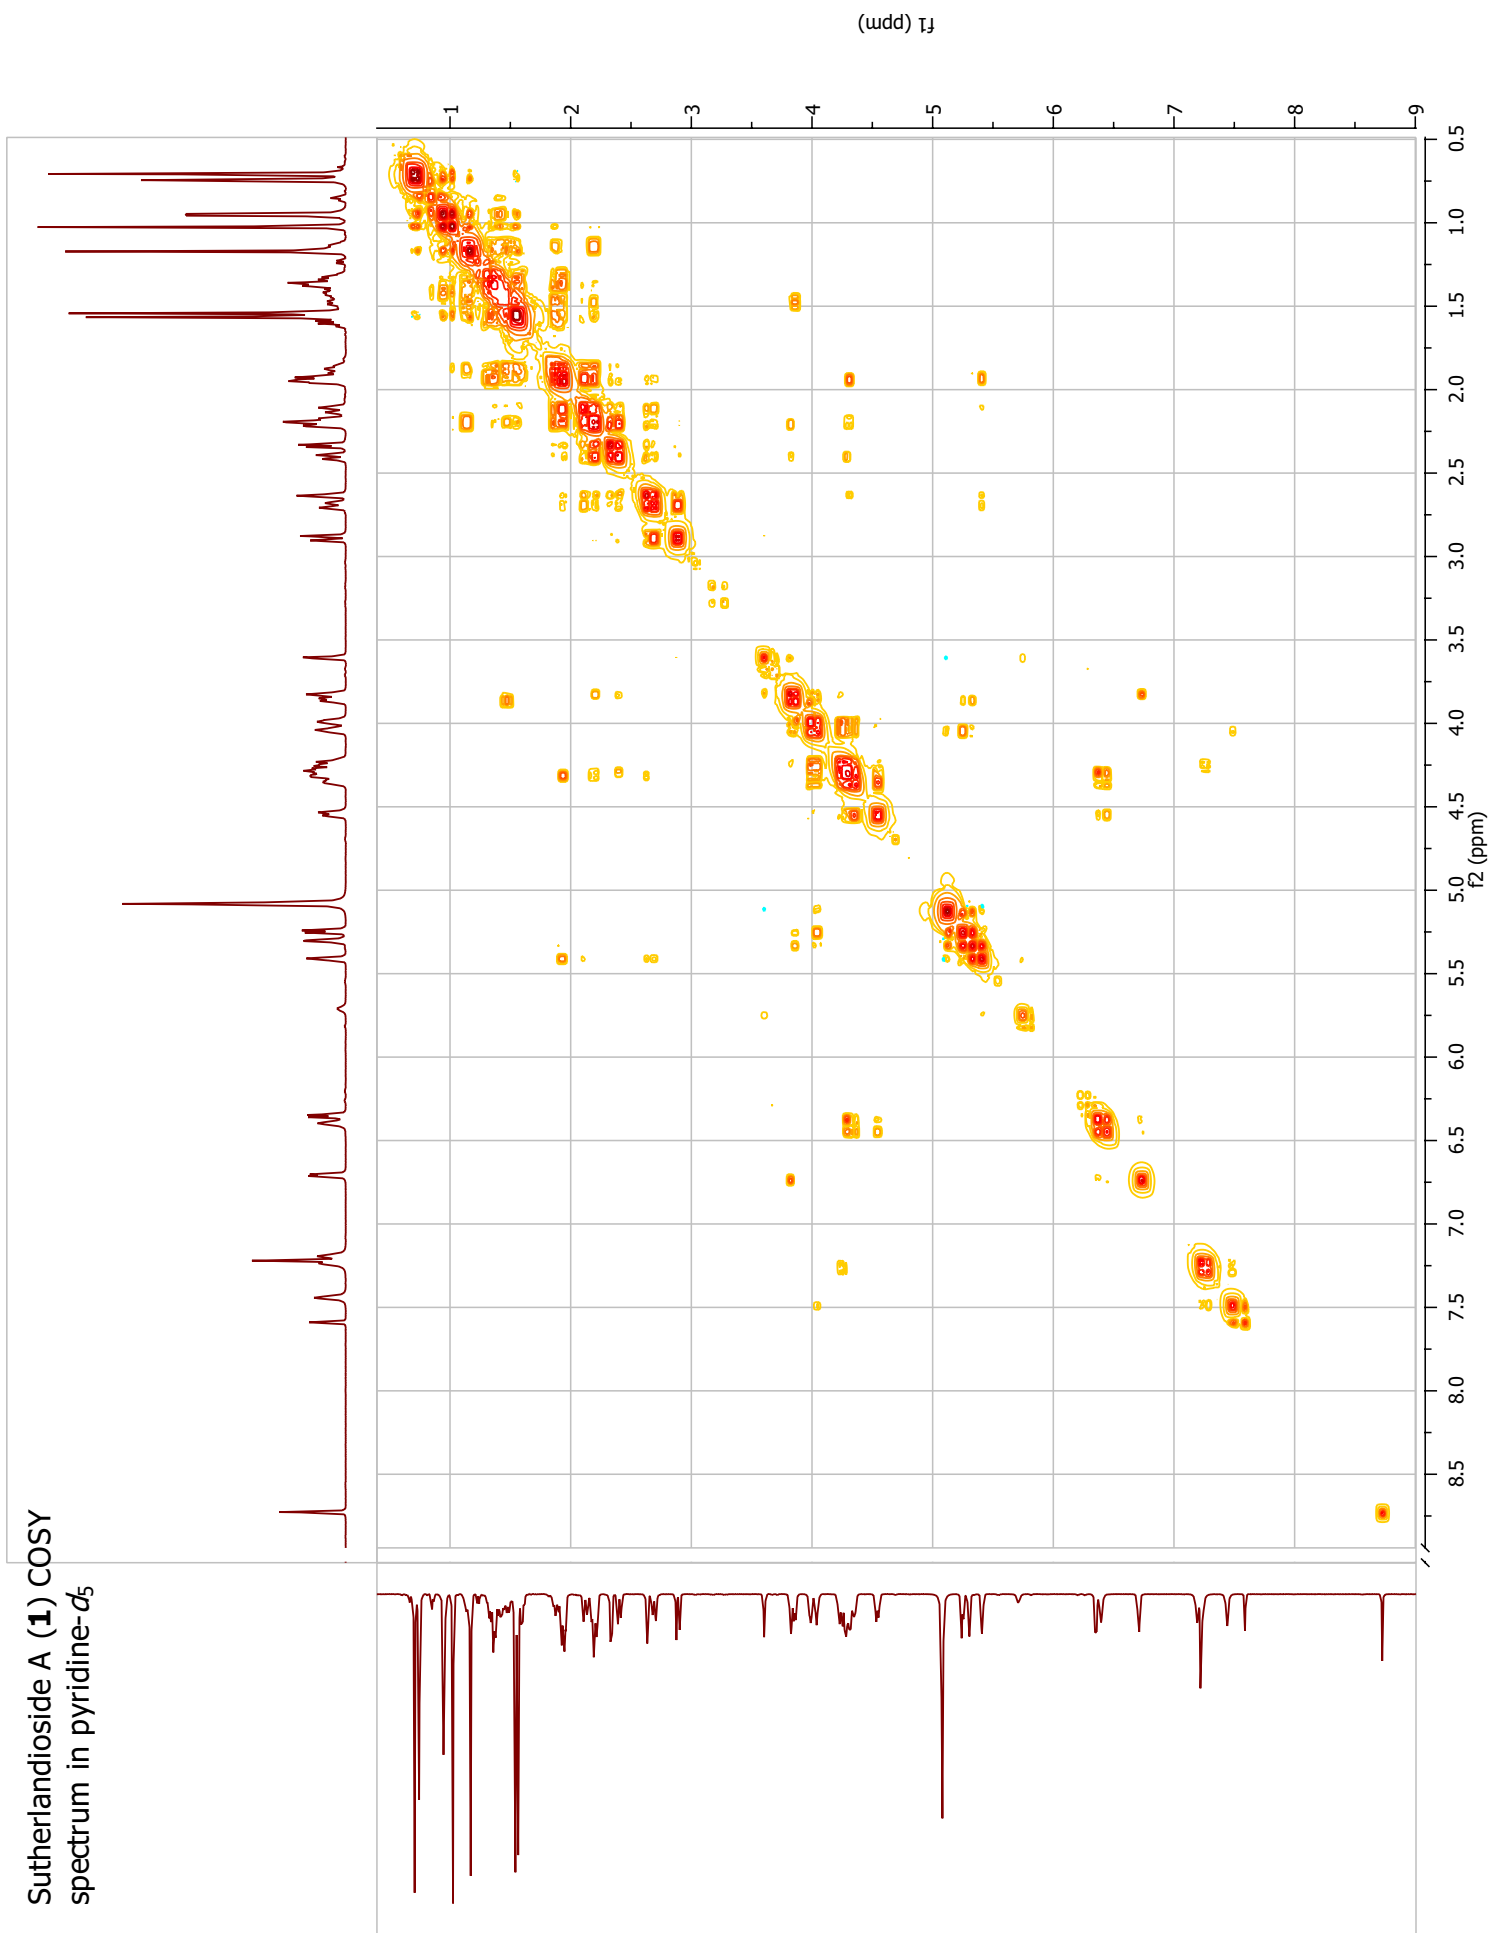

Sutherlandioside A (**1**) HMQC  
spectrum in pyridine-*d*<sub>5</sub>

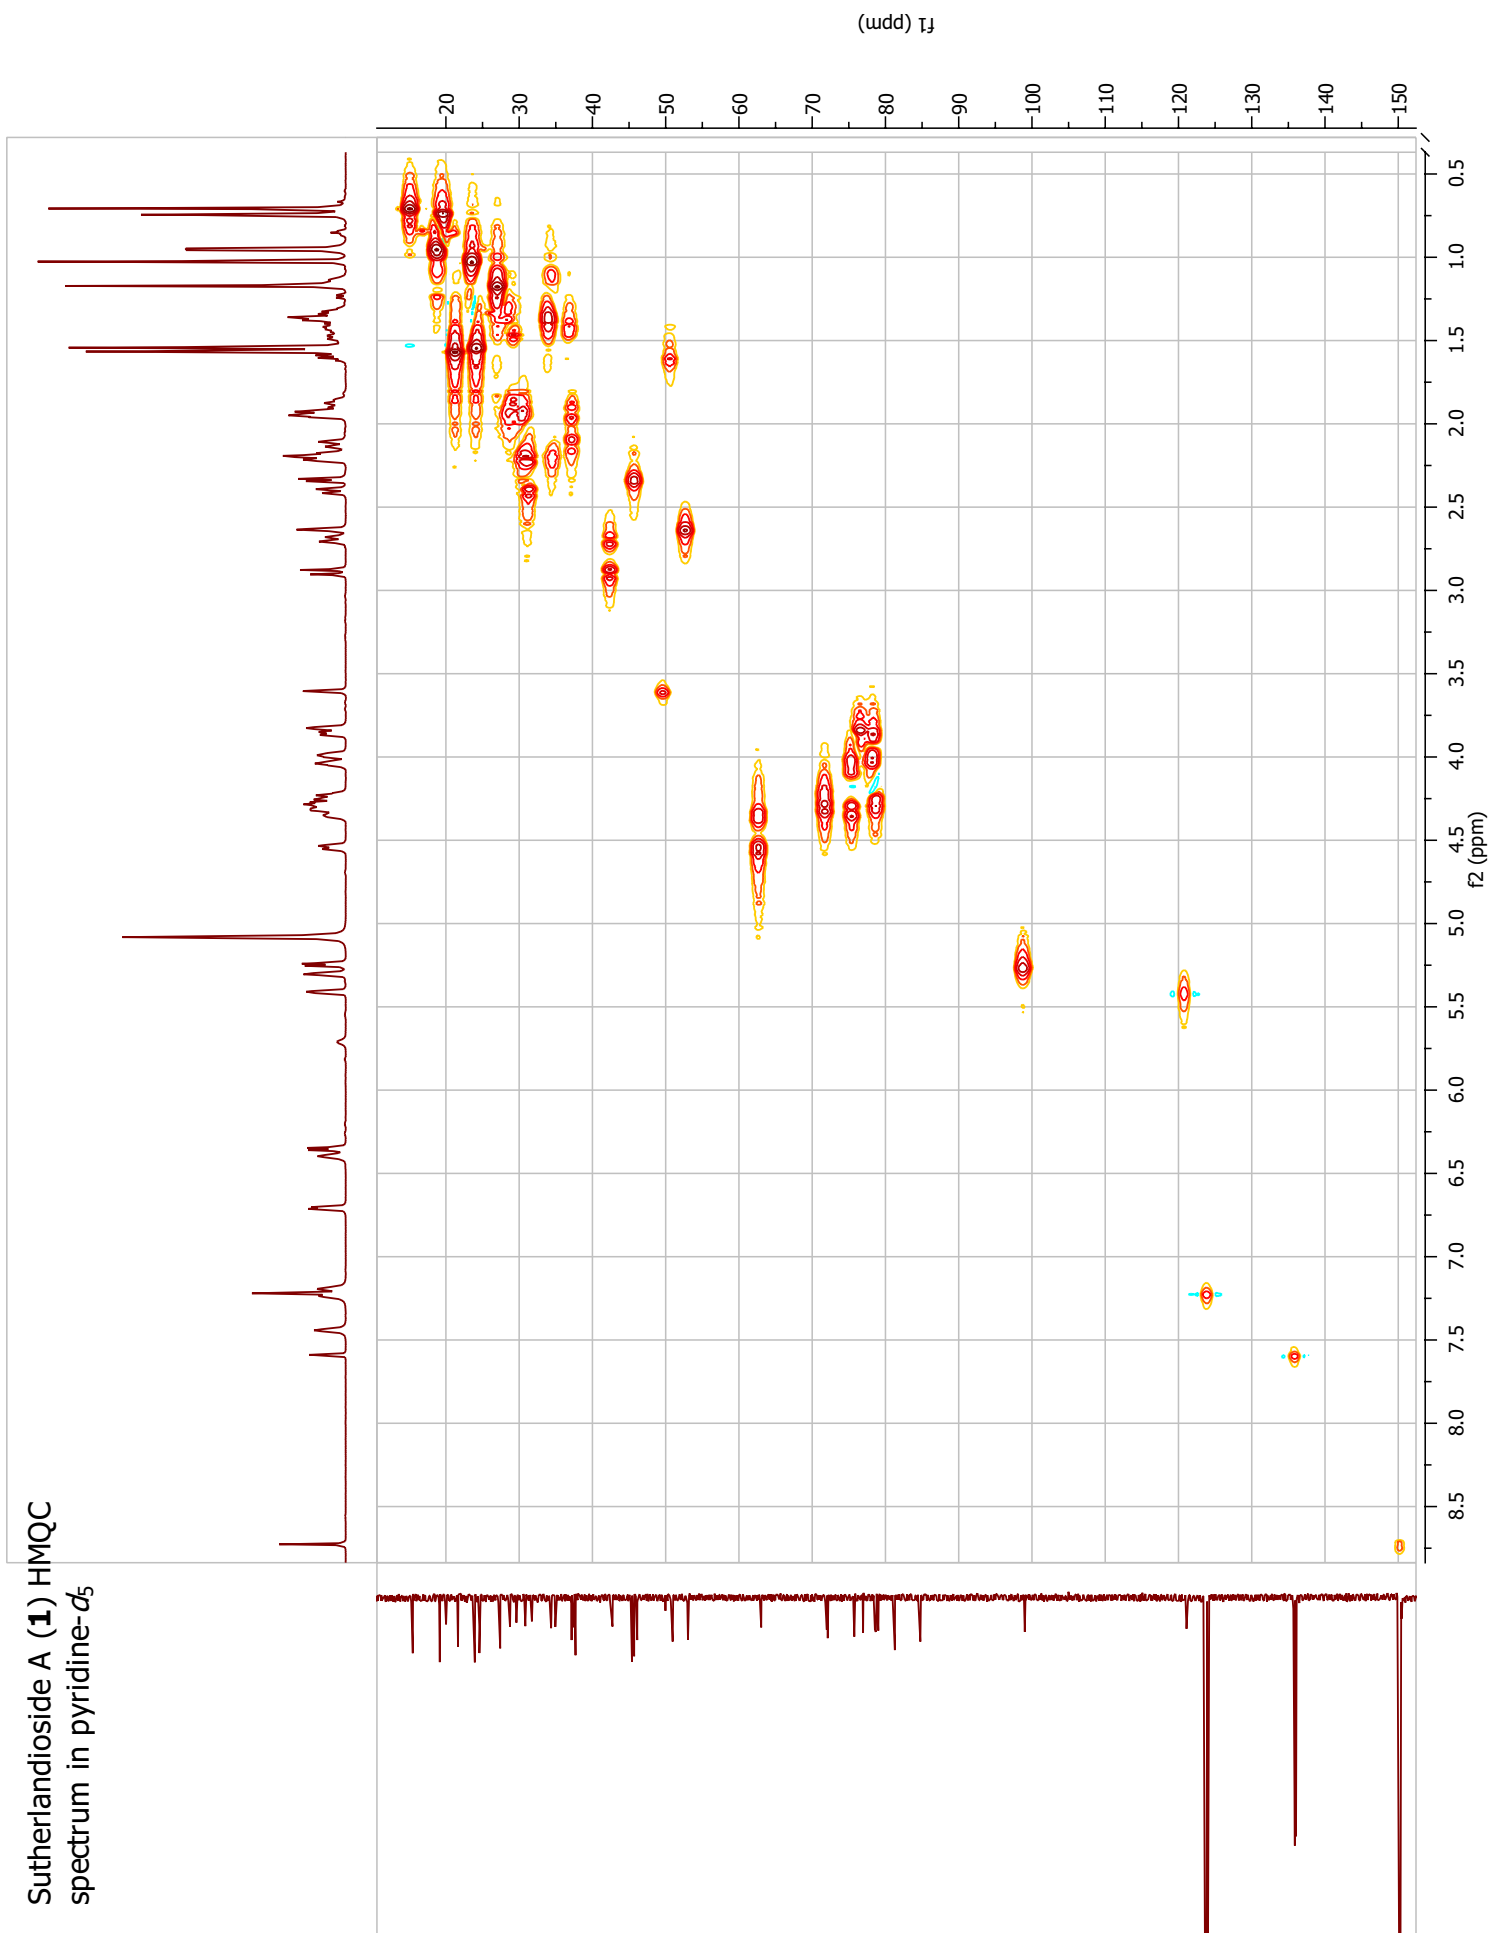

Sutherlandioside A (**1**) HMBC spectrum in pyridine-*d*<sub>5</sub>

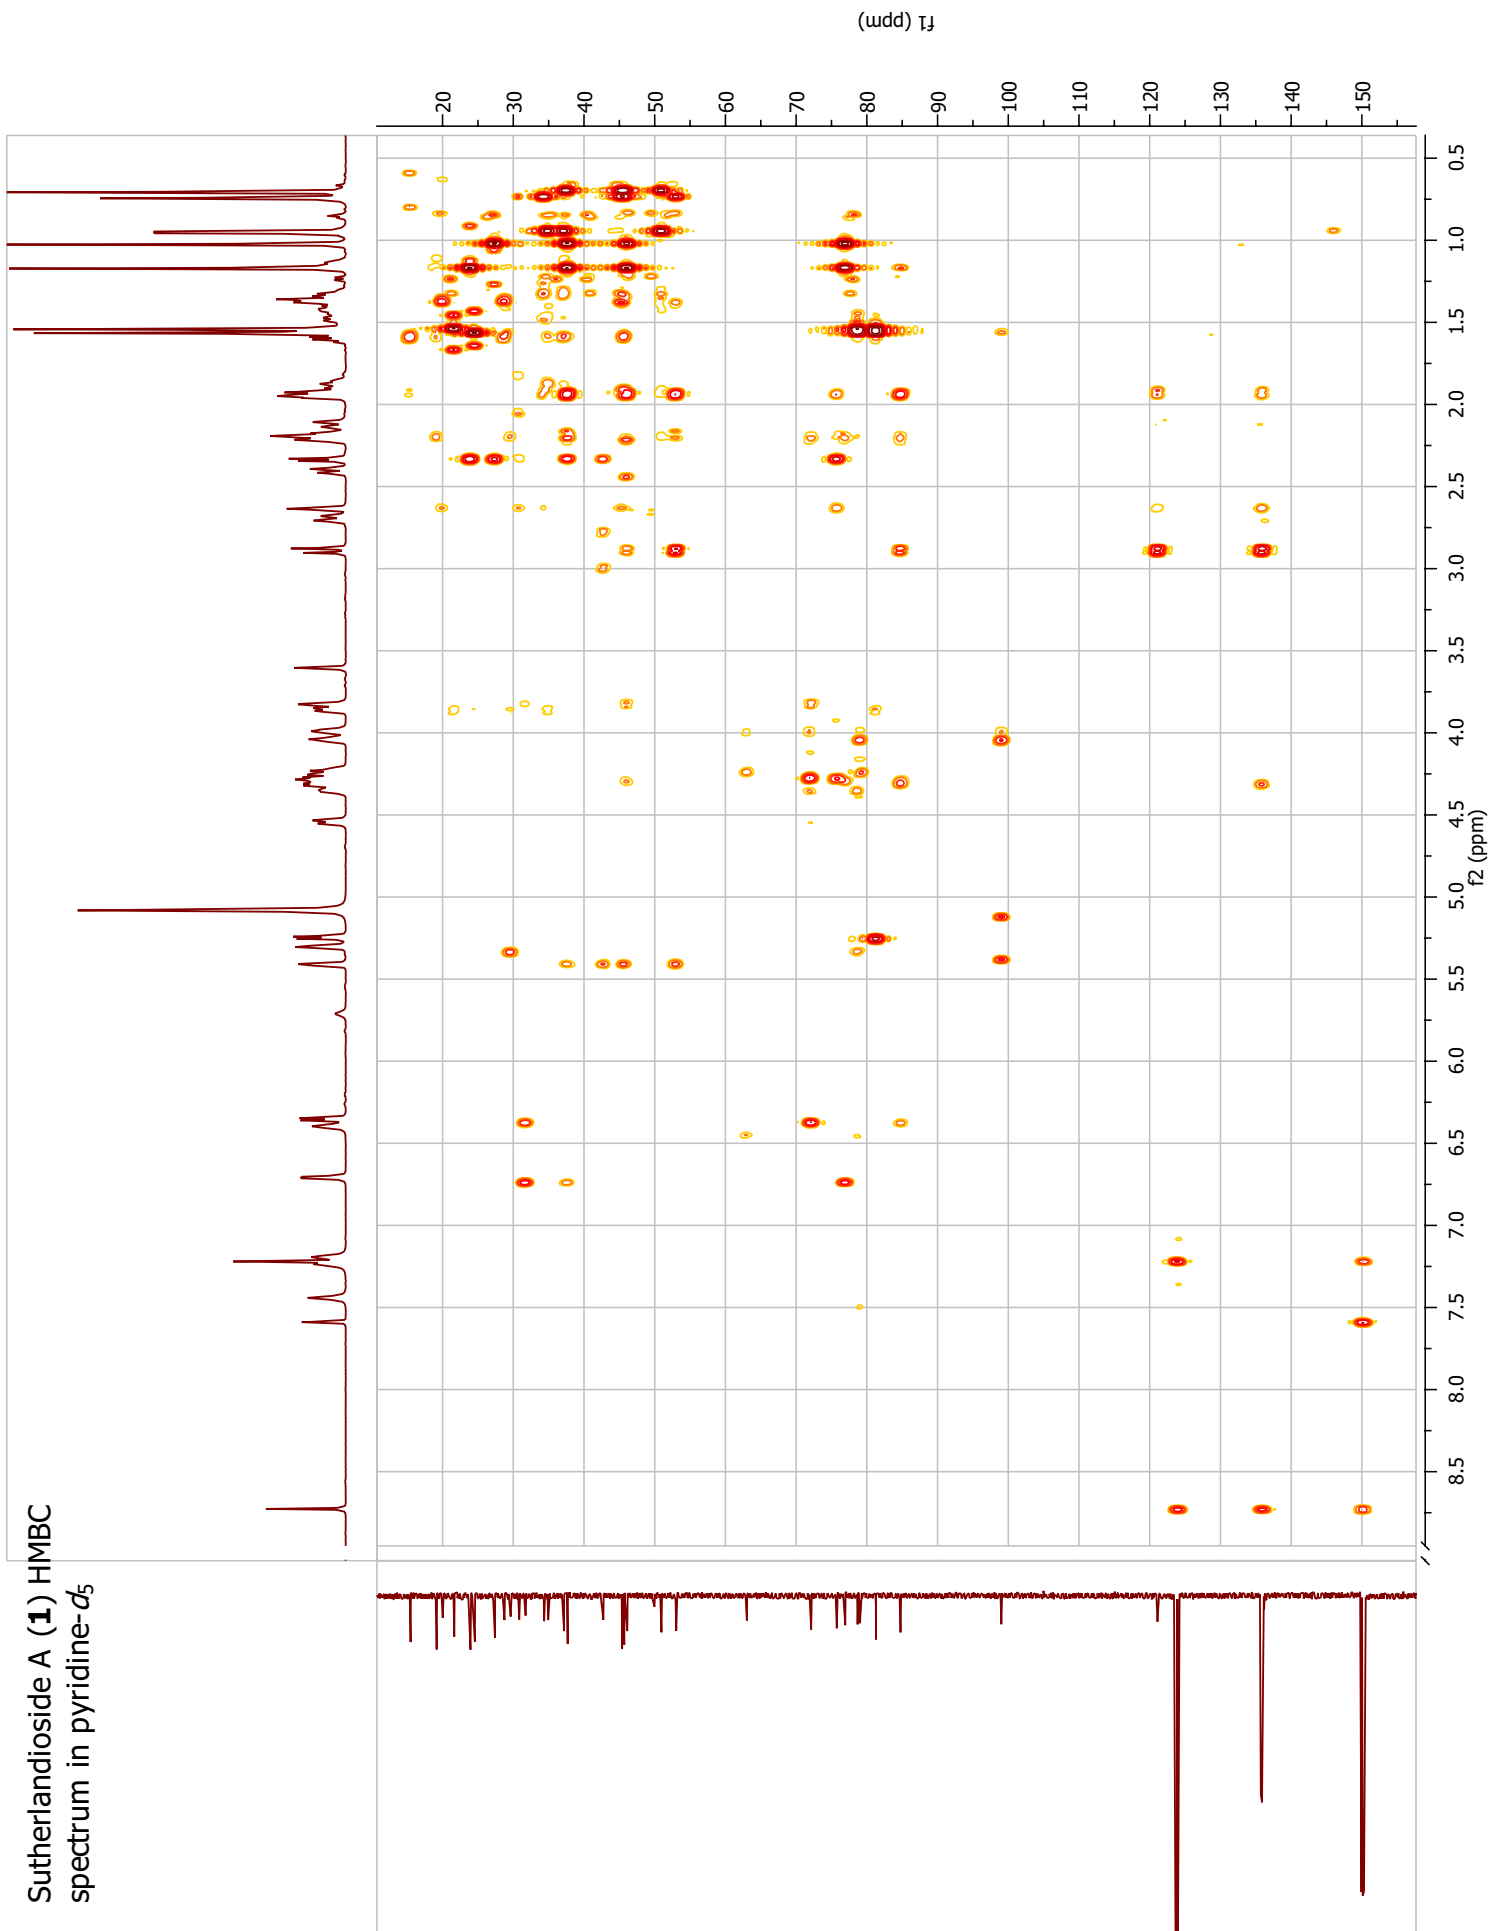



Sutherlandioside A (**1**) expanded  
HMBC spectrum in pyridine-*d*<sub>5</sub>

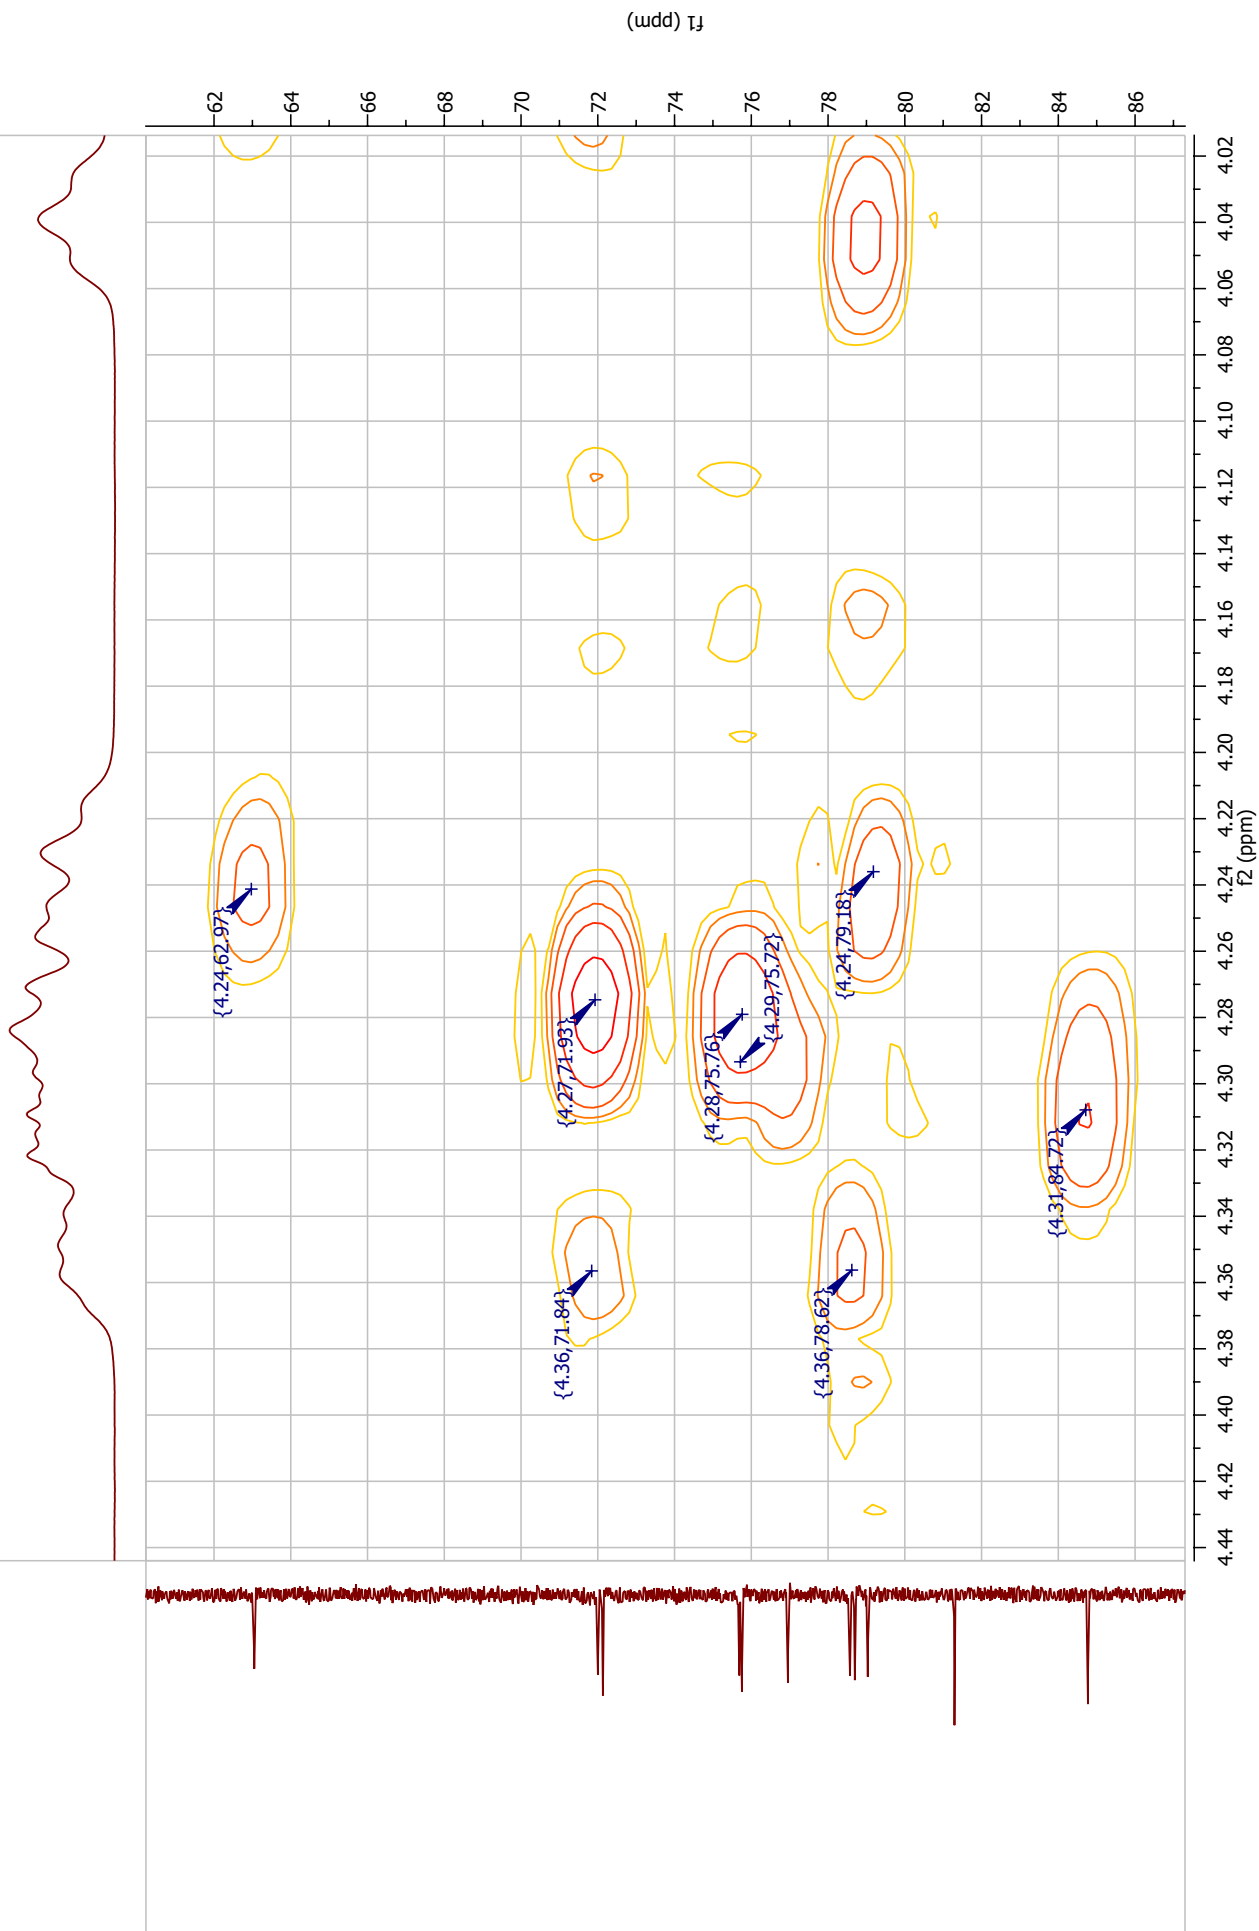

Sutherlandioside A (**1**) ROSEY  
spectrum in pyridine-*d*<sub>5</sub>

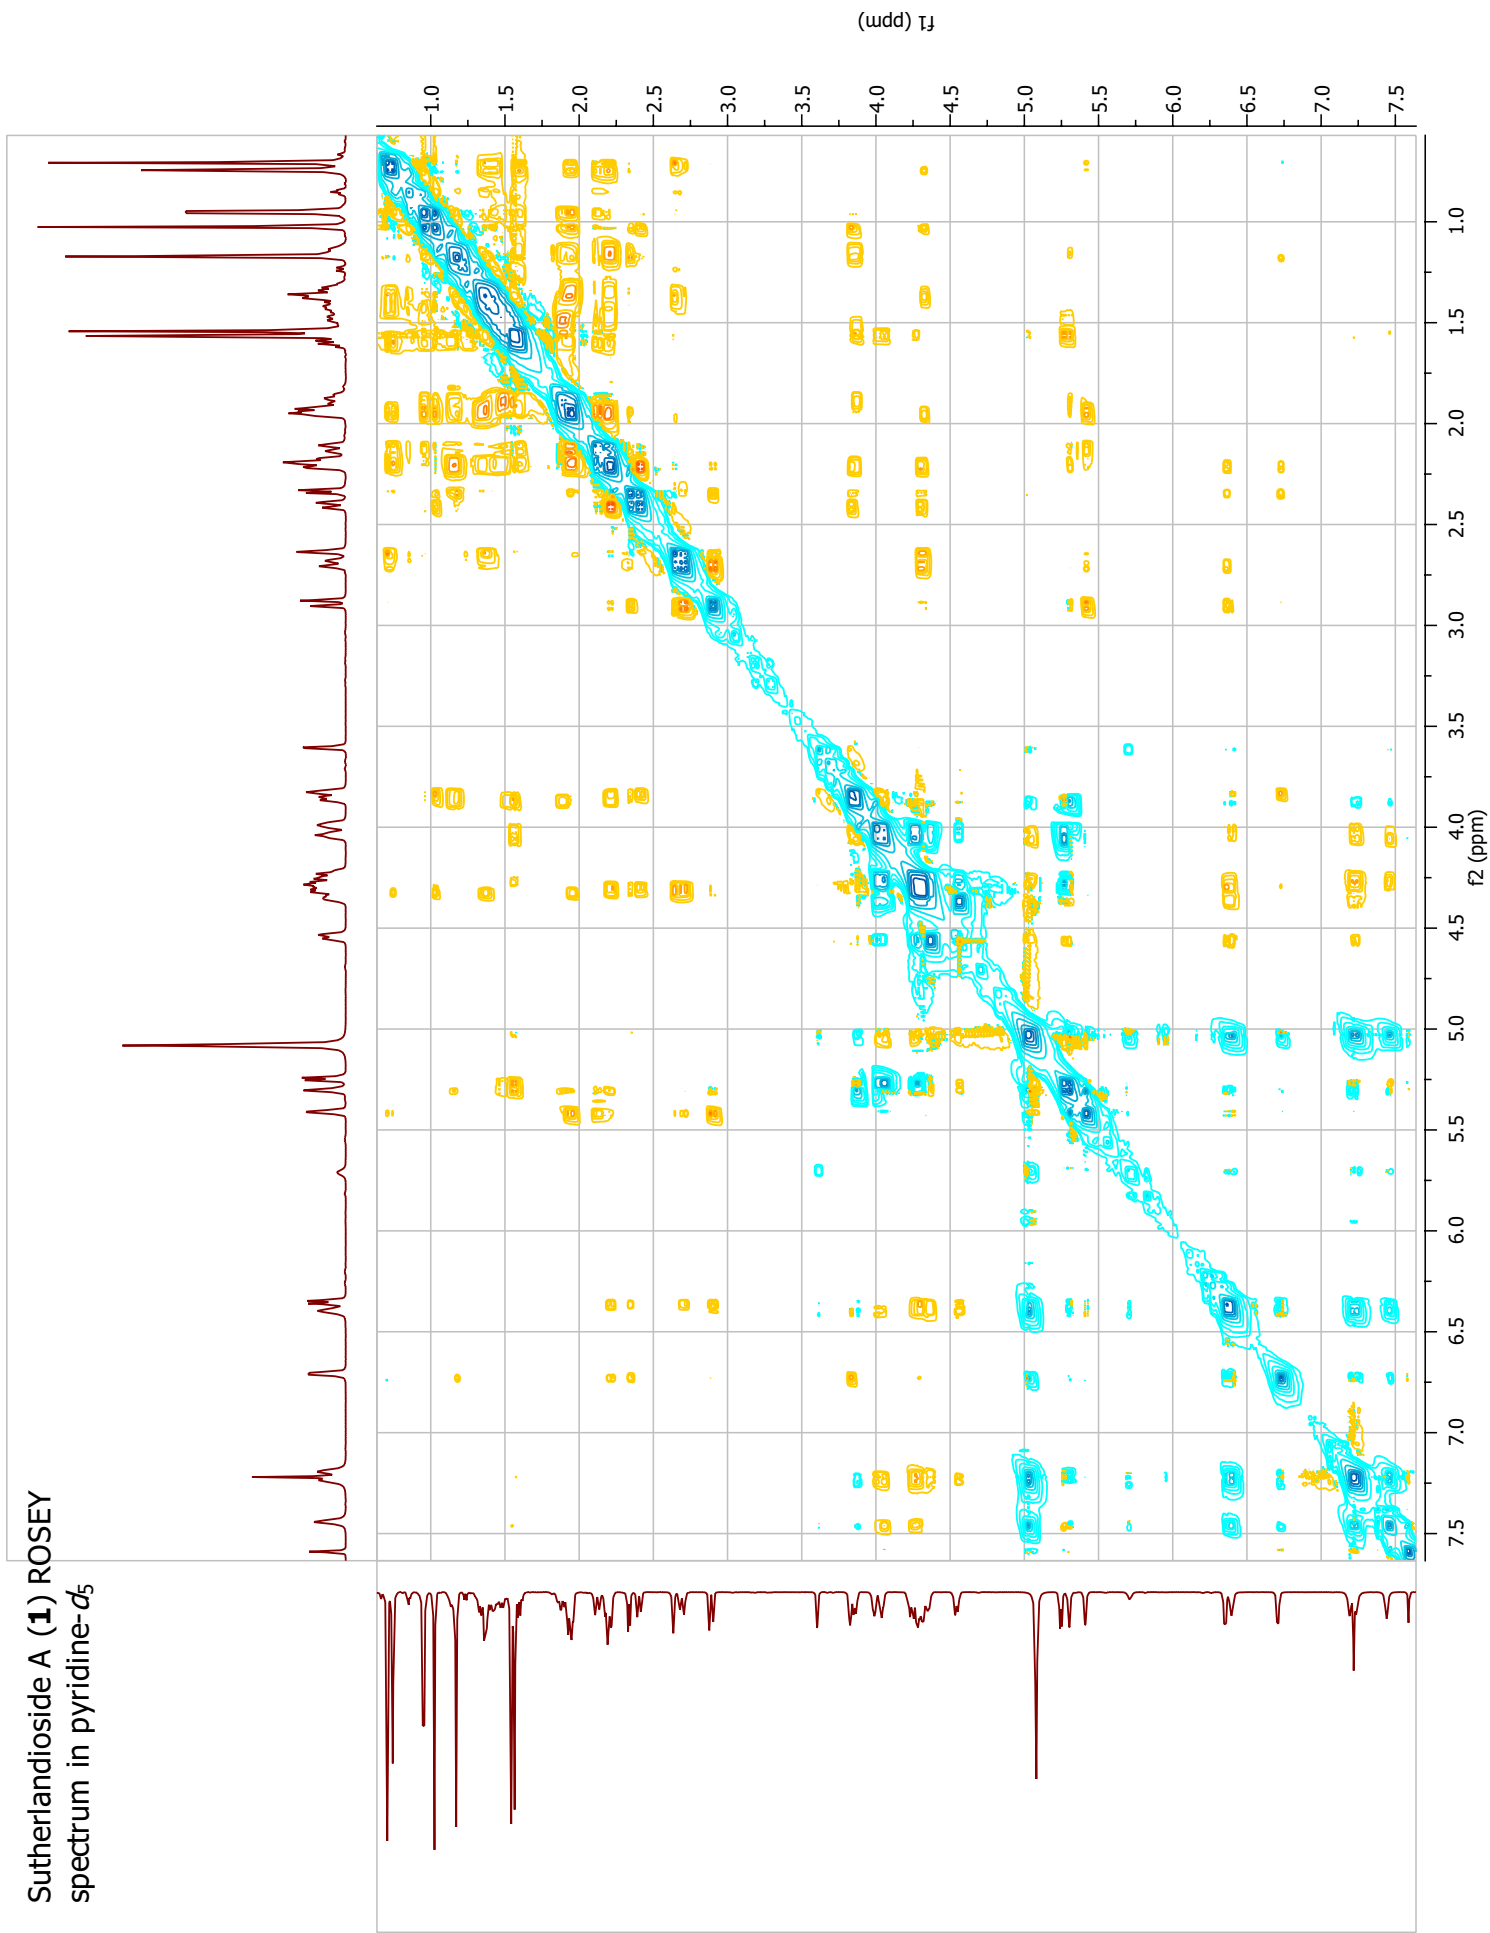

Sutherlandioside A (**1**) expanded  
ROSEY spectrum in pyridine- $d_5$

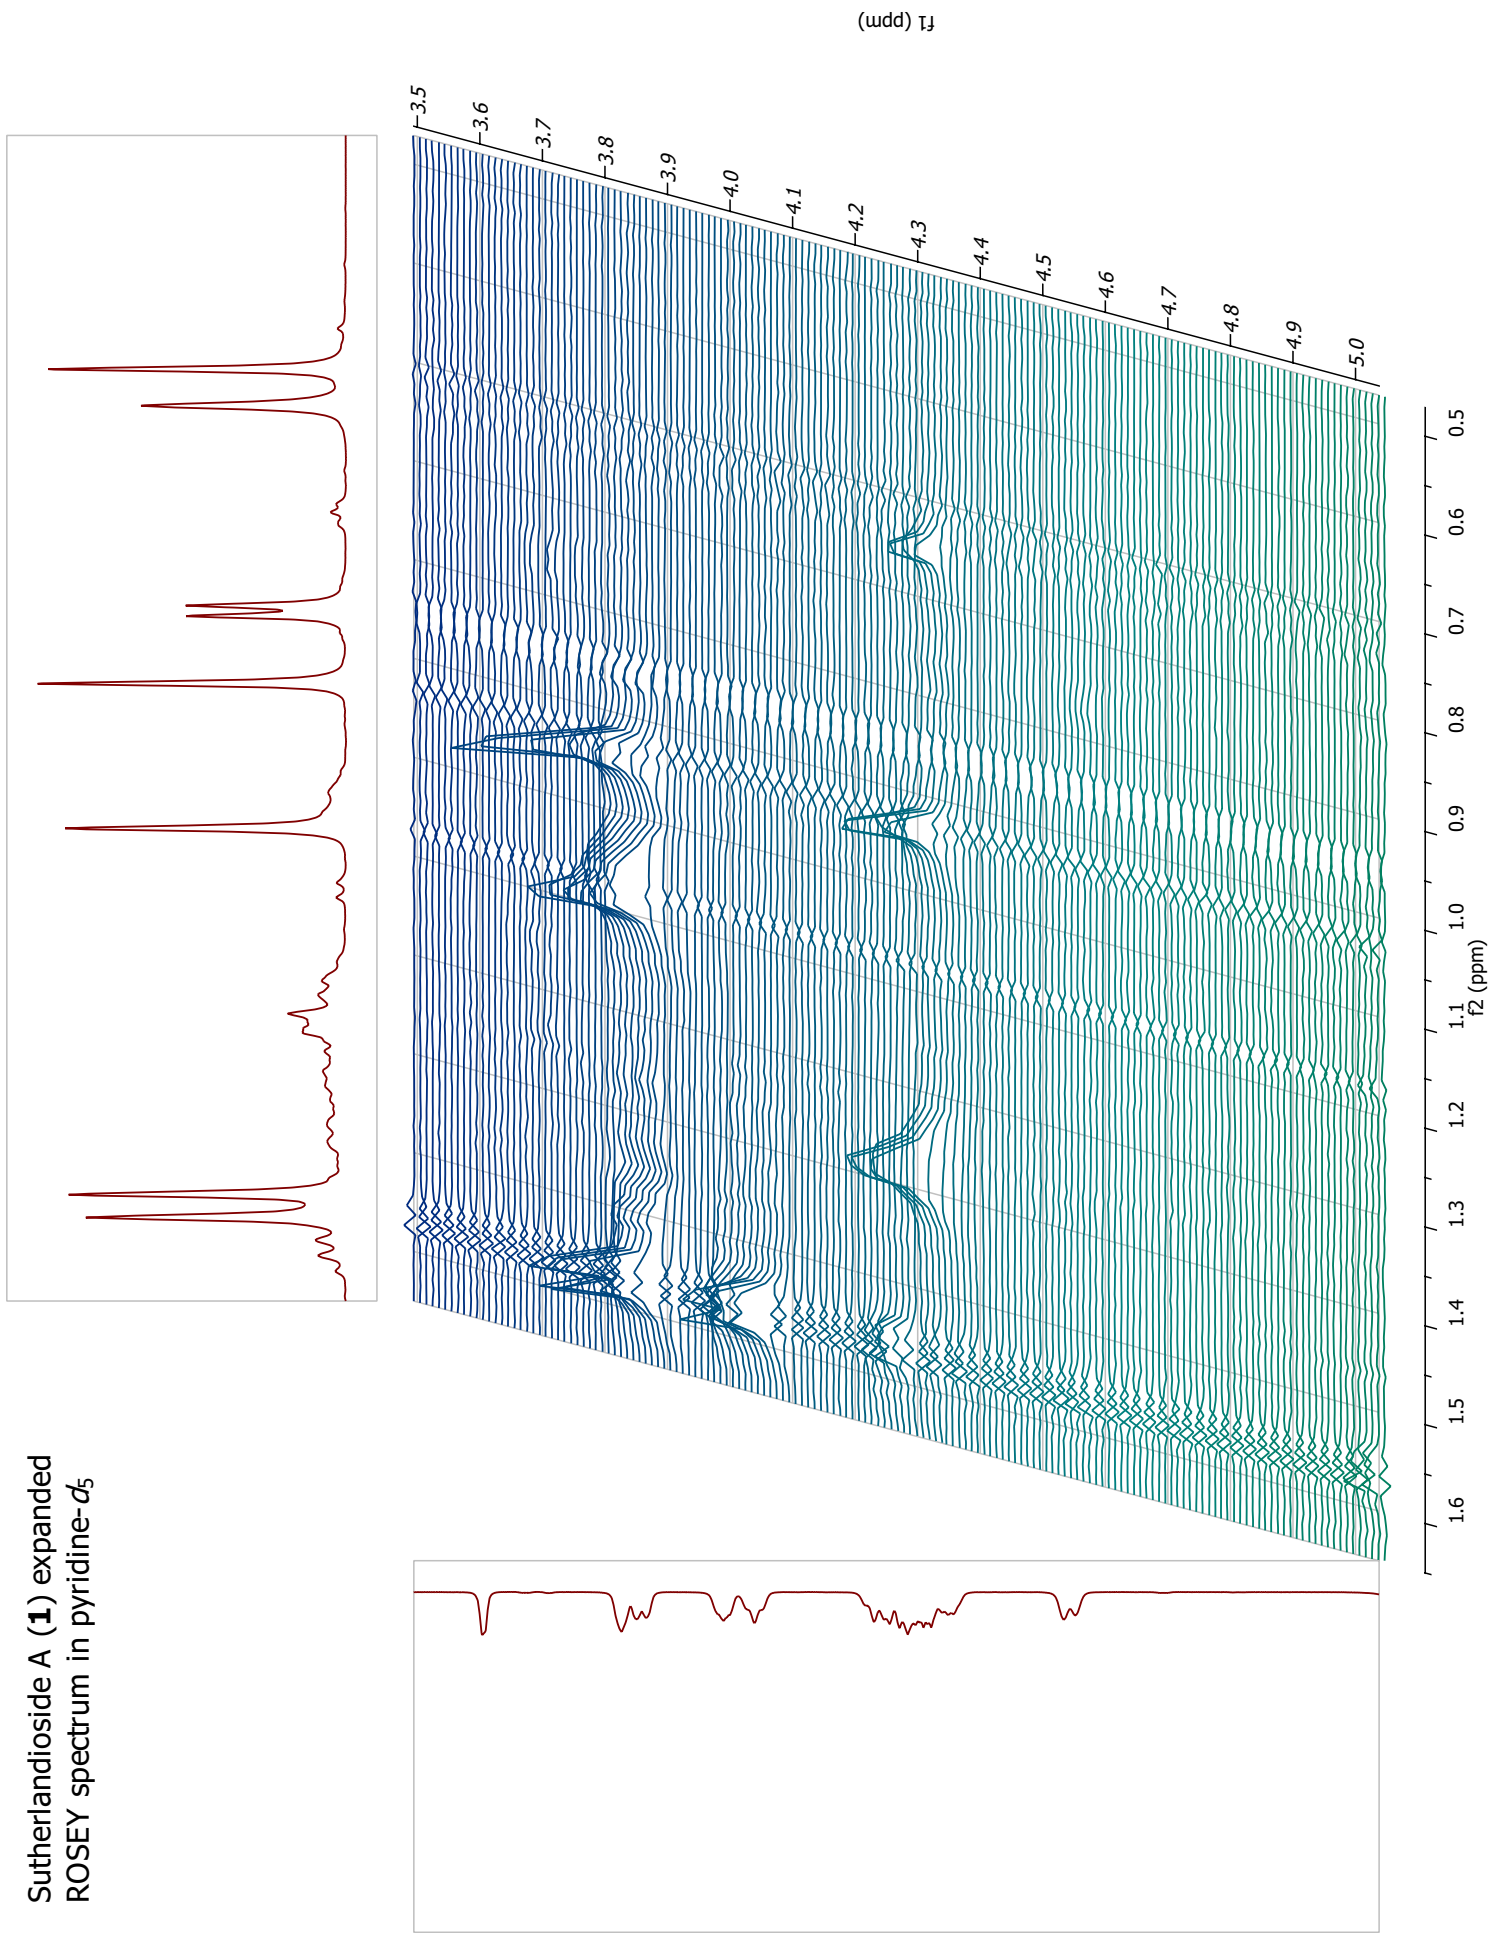

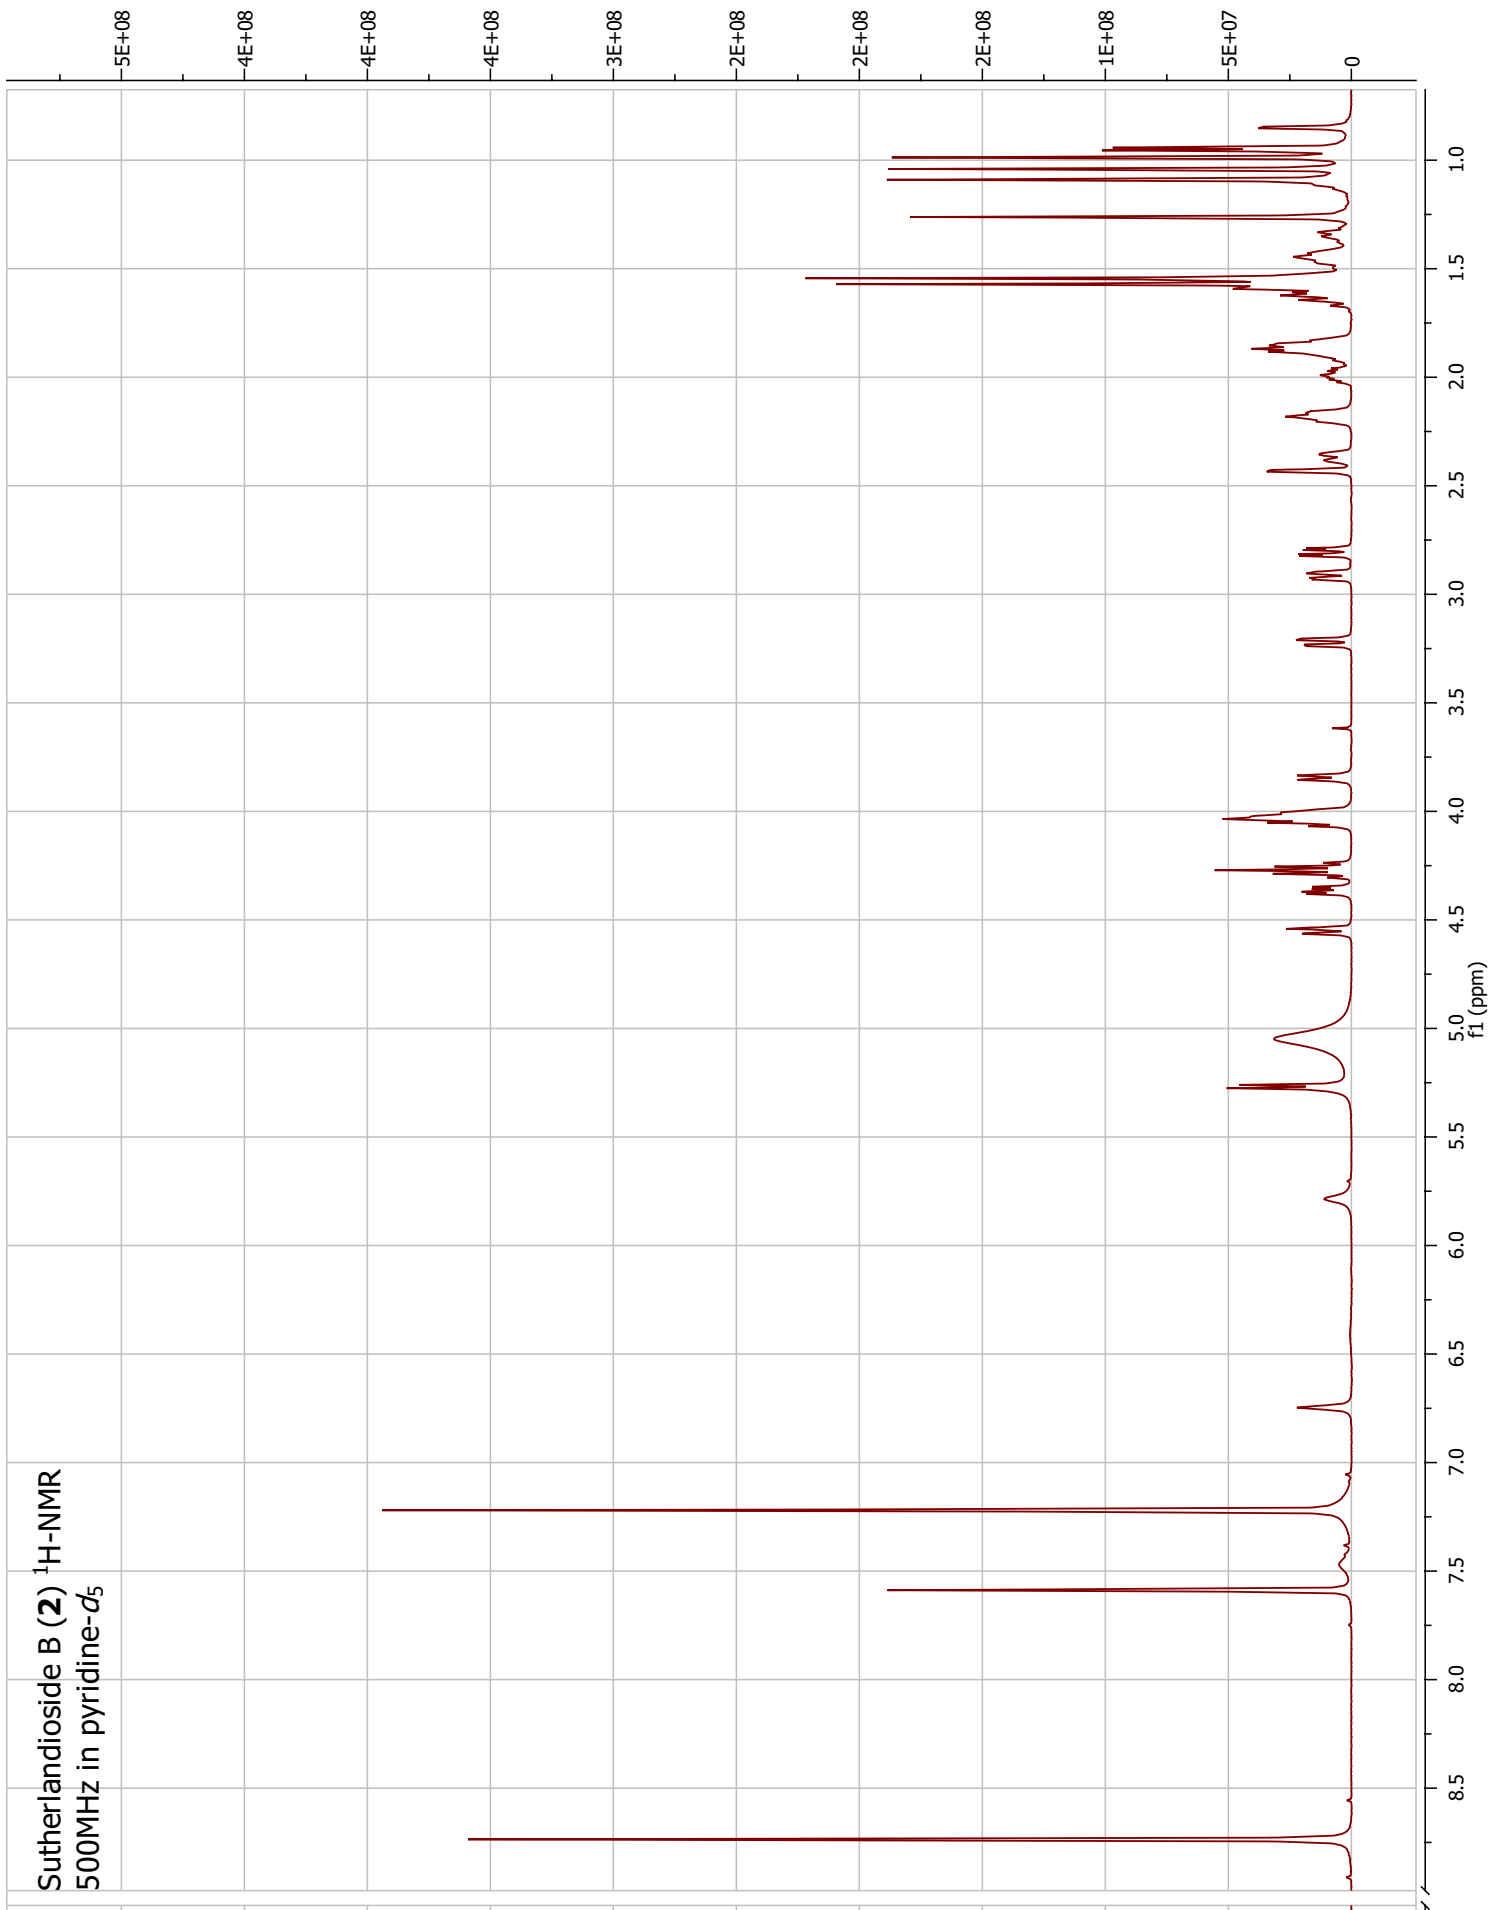

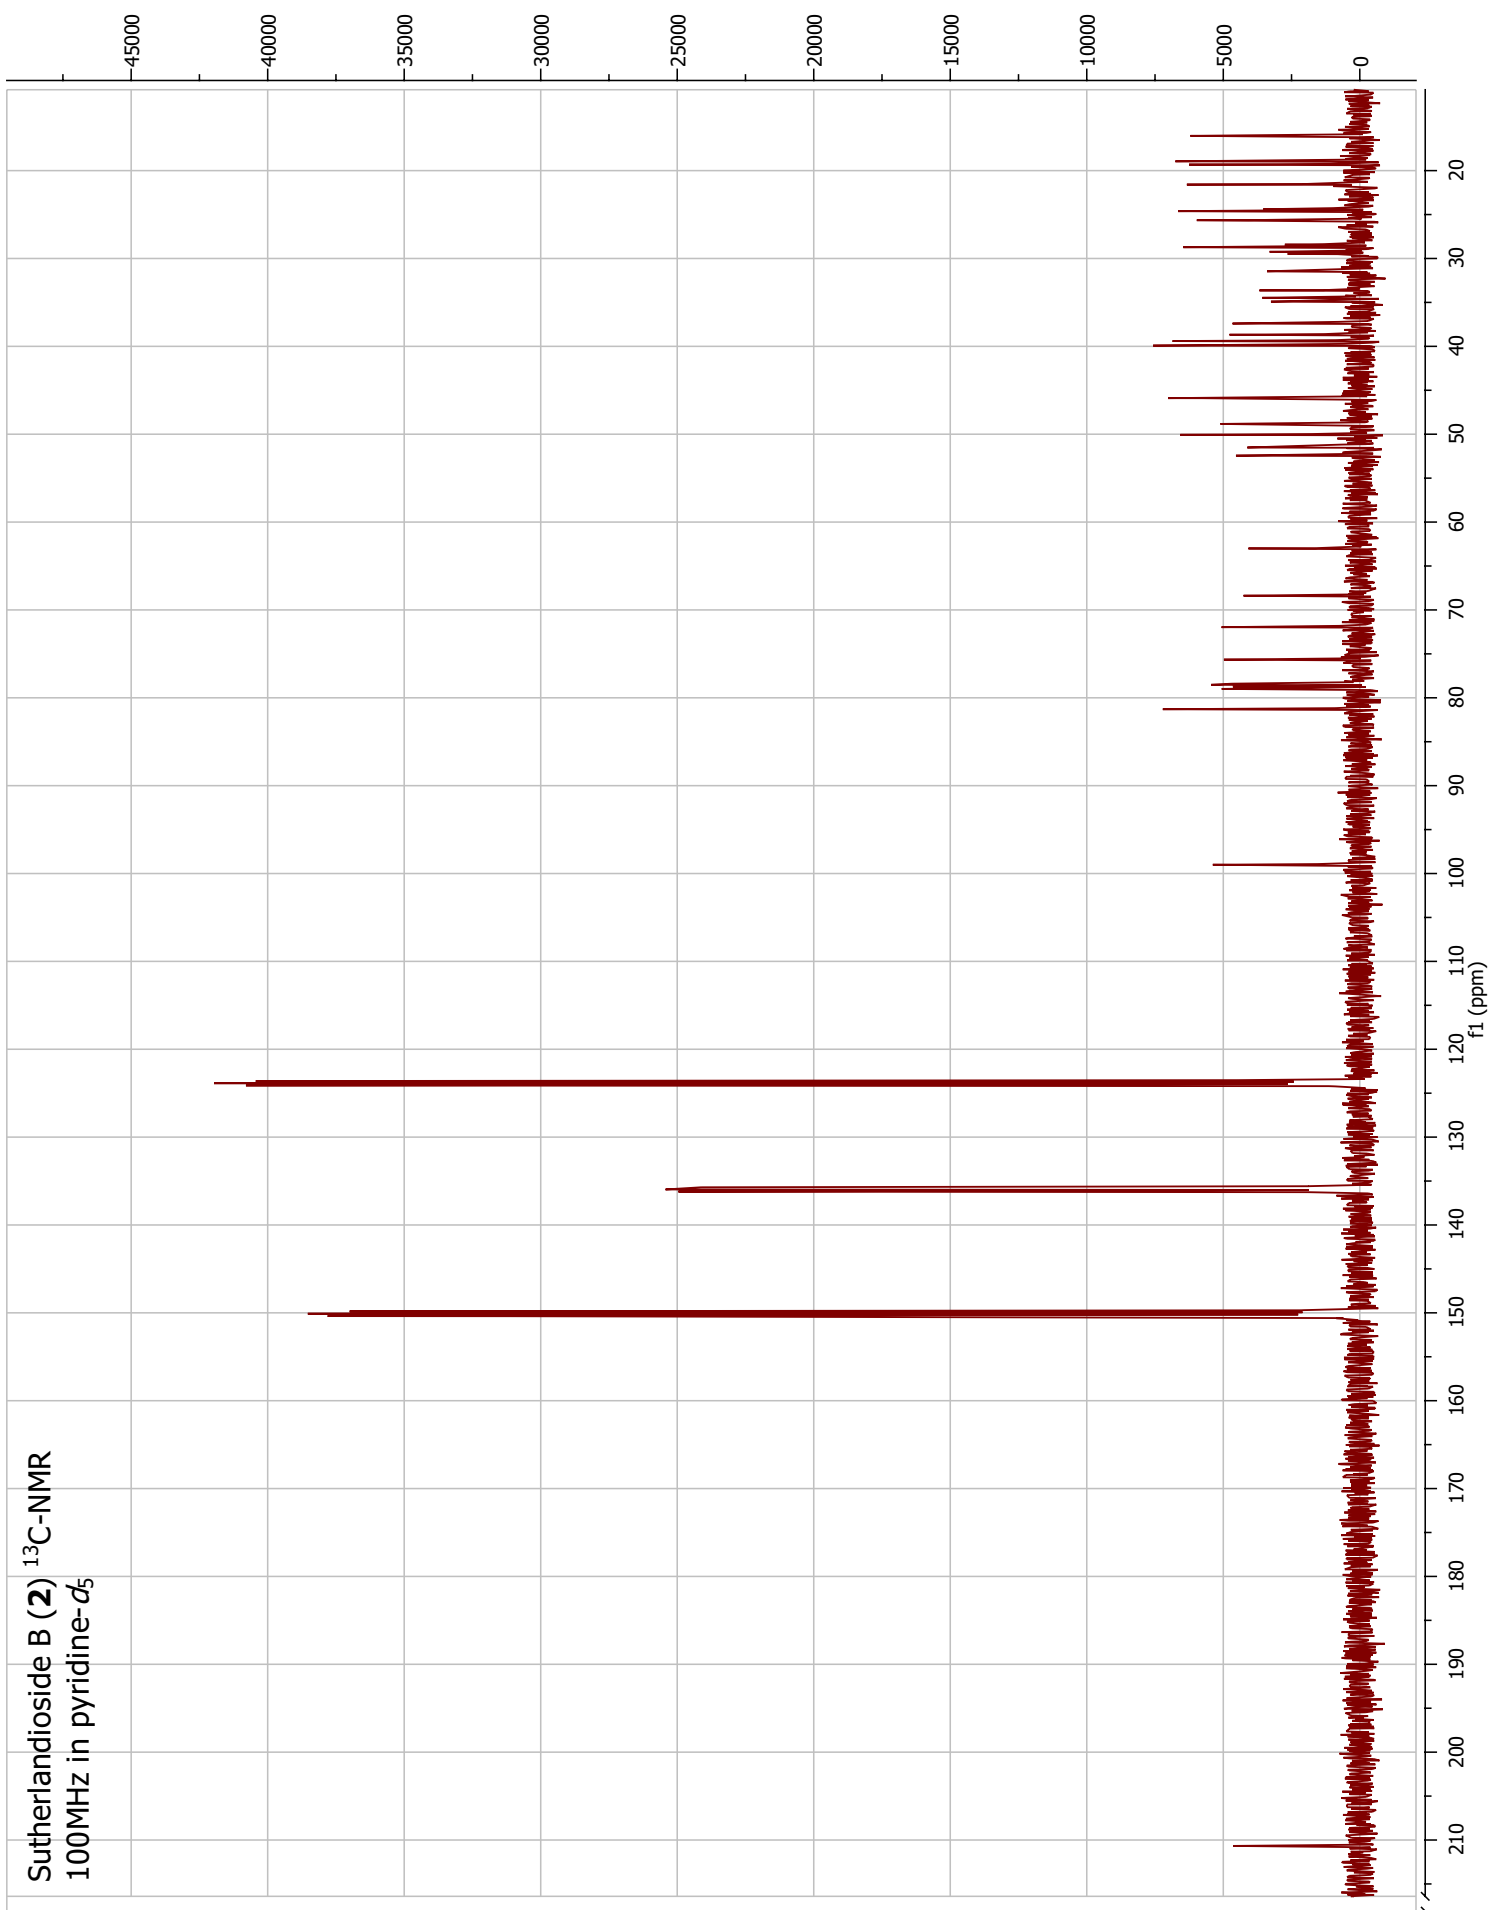

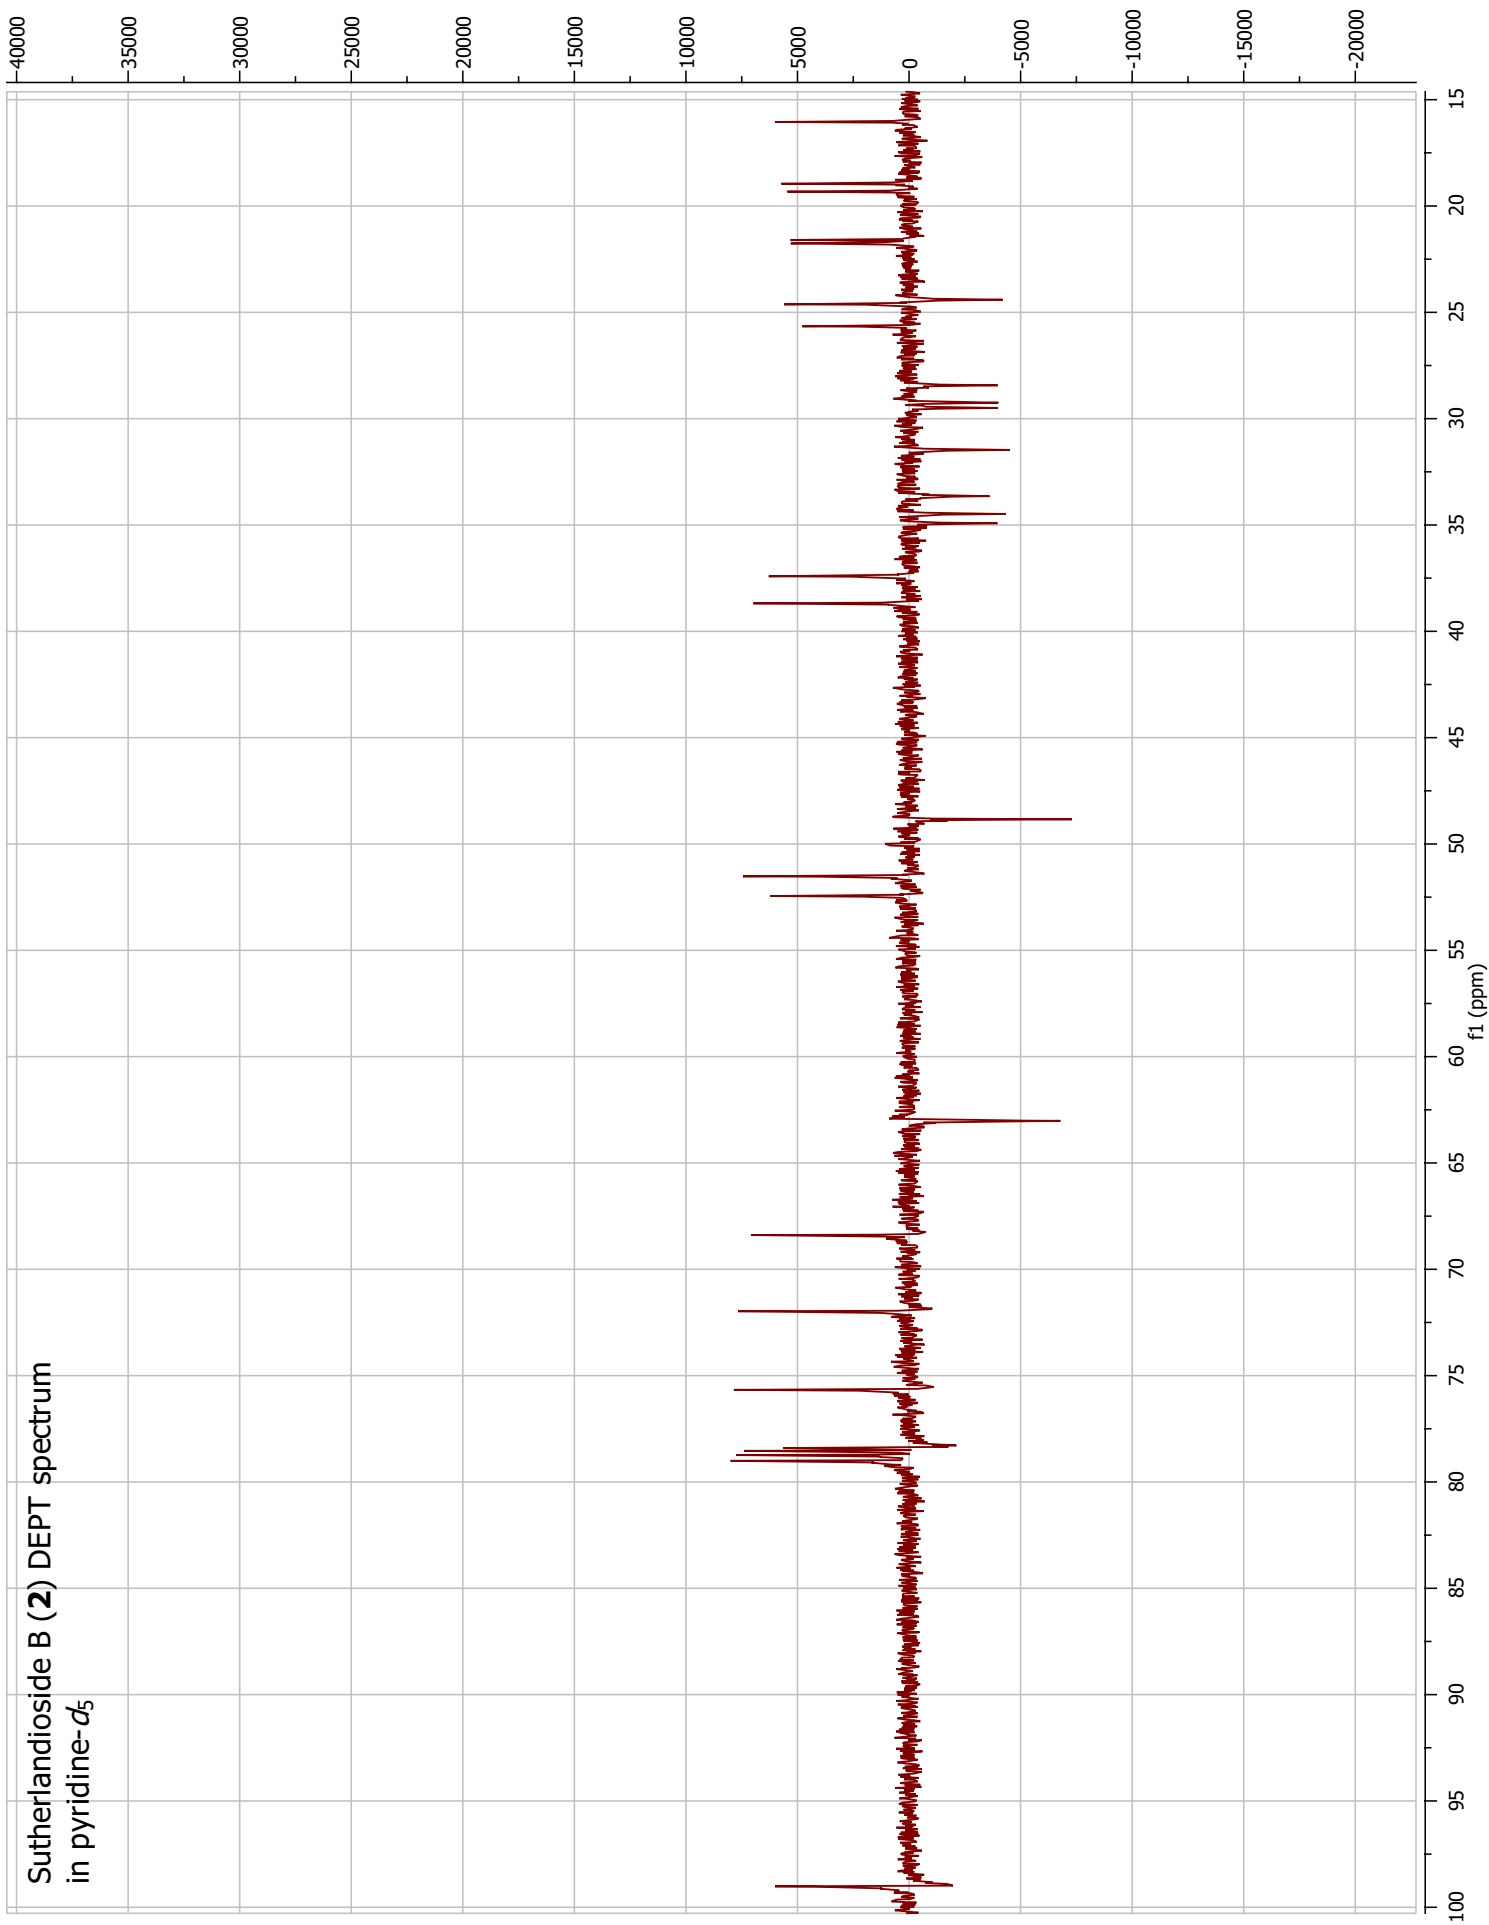

Sutherlandioside B (2) COSY spectrum  
in pyridine-*d*<sub>5</sub>

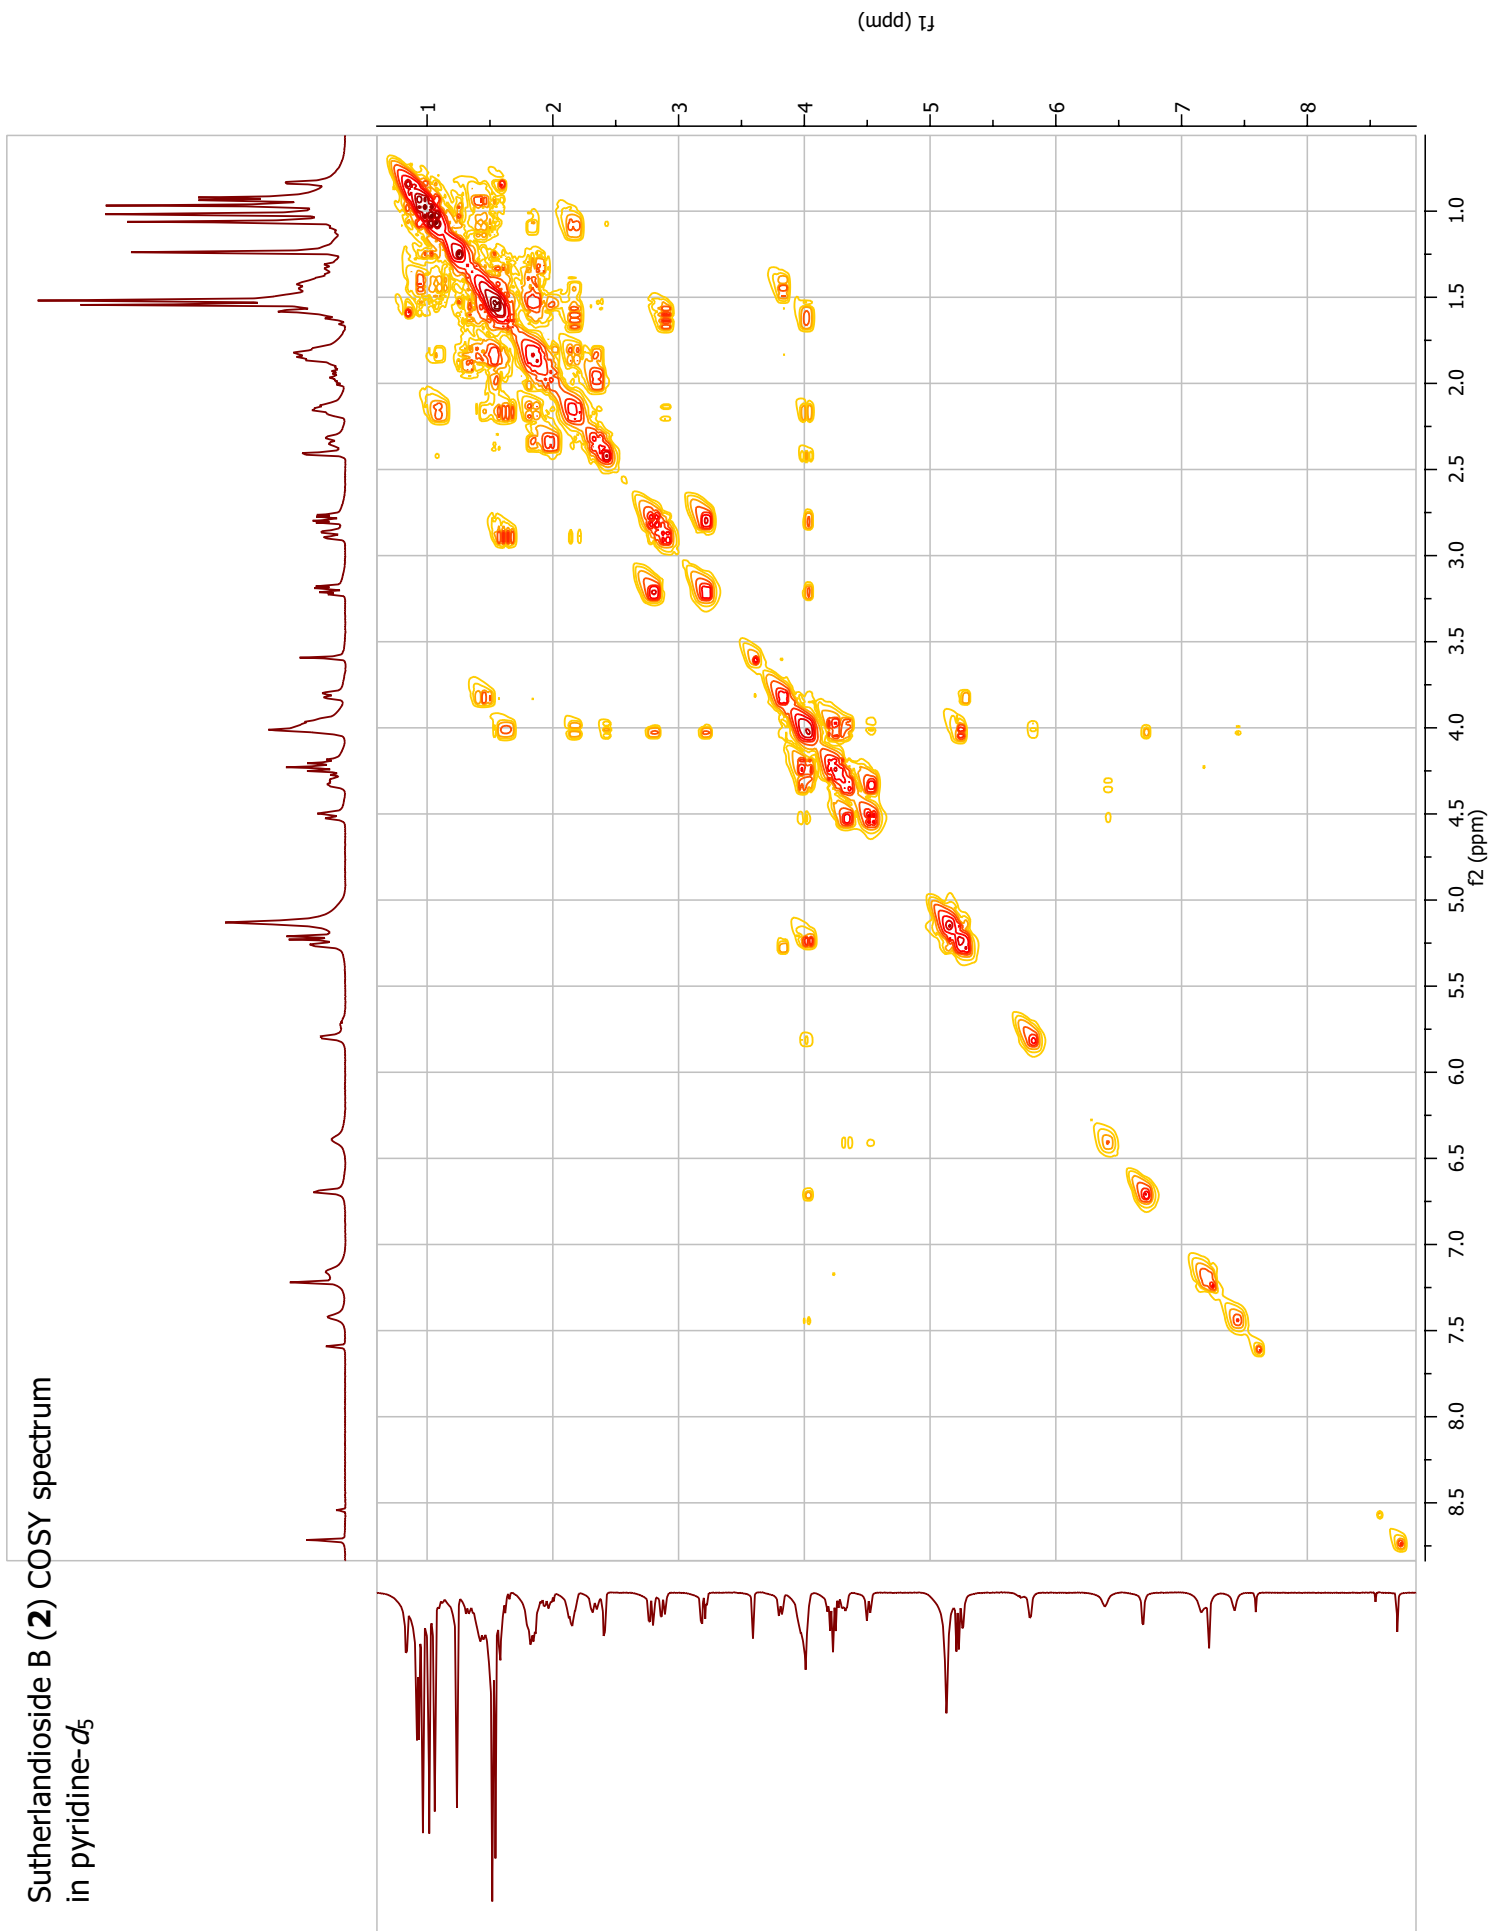

Sutherlandioside B (2) HMQC  
spectrum in pyridine- $d_5$

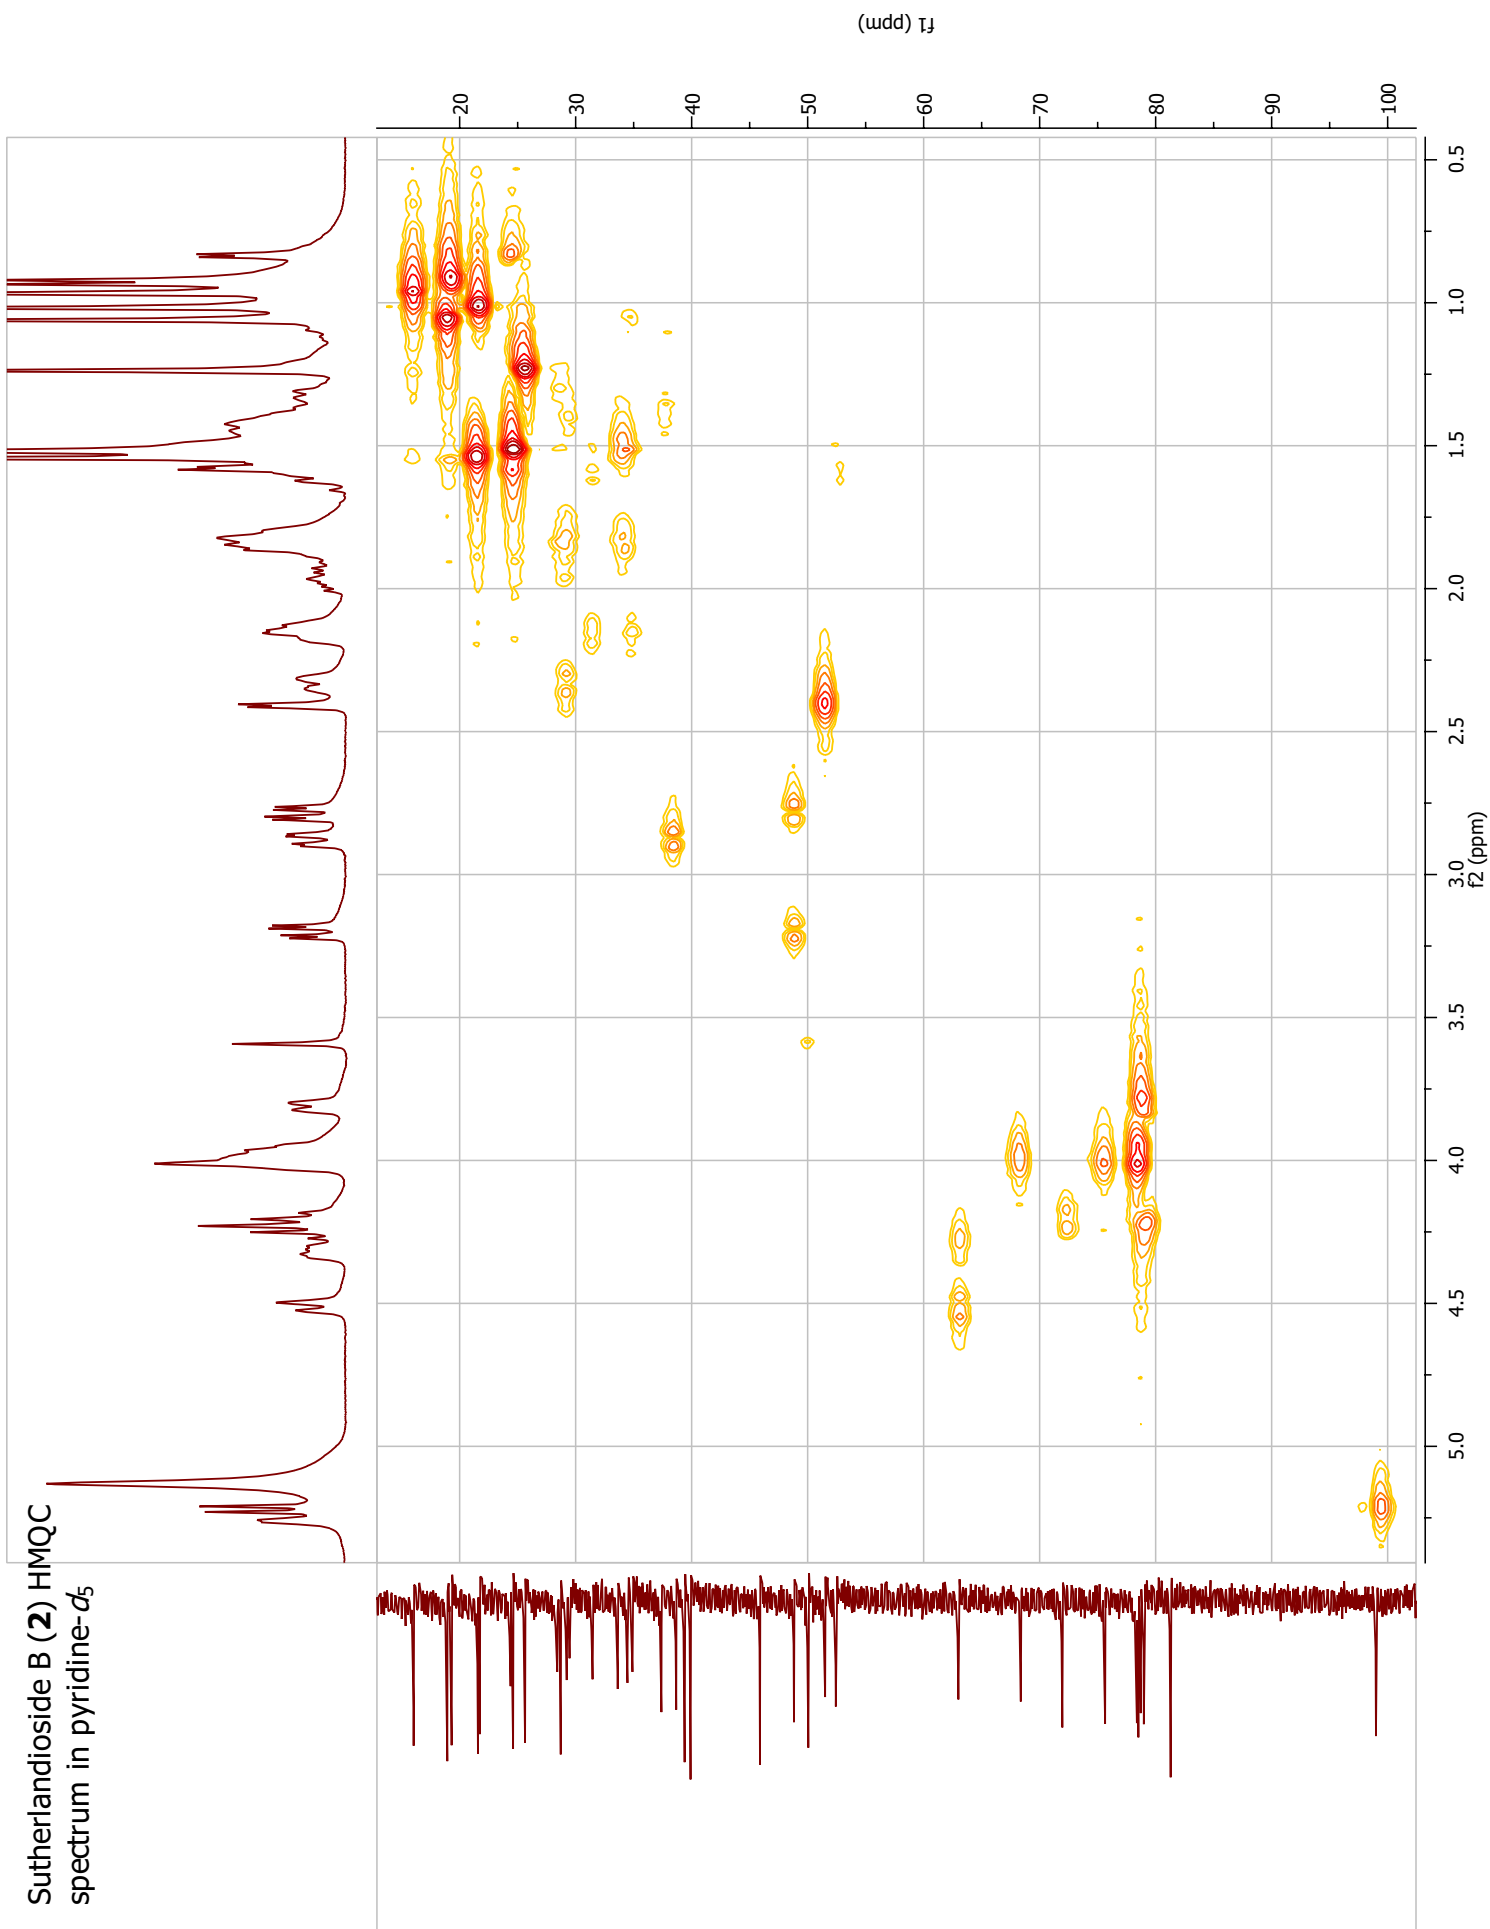



Sutherlandioside B (2) HMBC  
spectrum in pyridine-*d*<sub>5</sub>

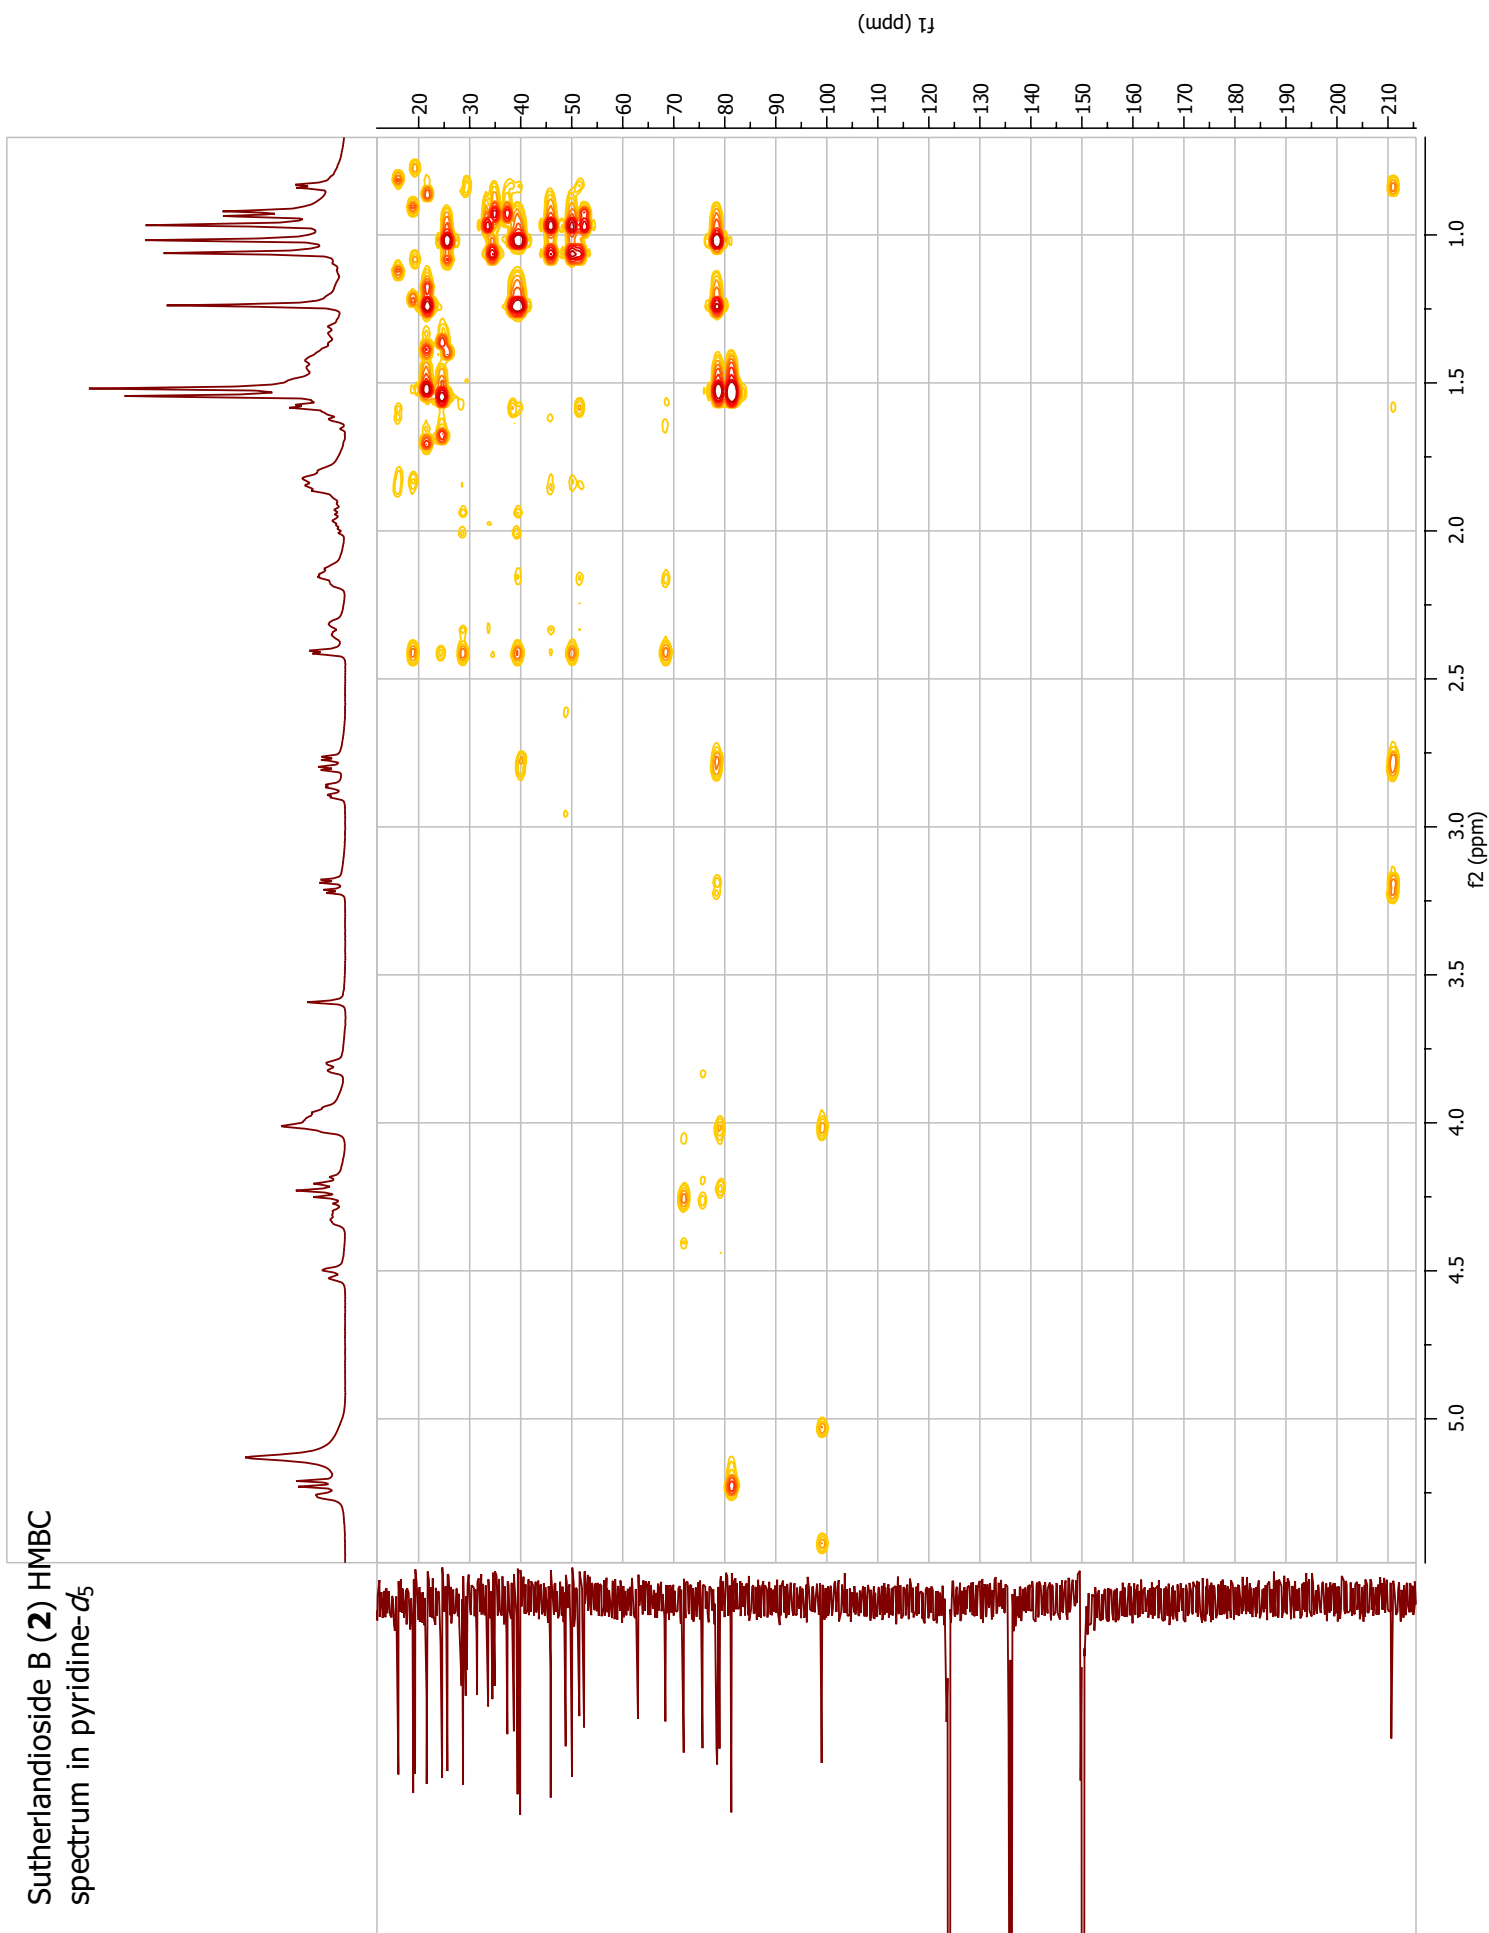

Sutherlandioside B (2) ROESY spectrum in pyridine- $d_5$

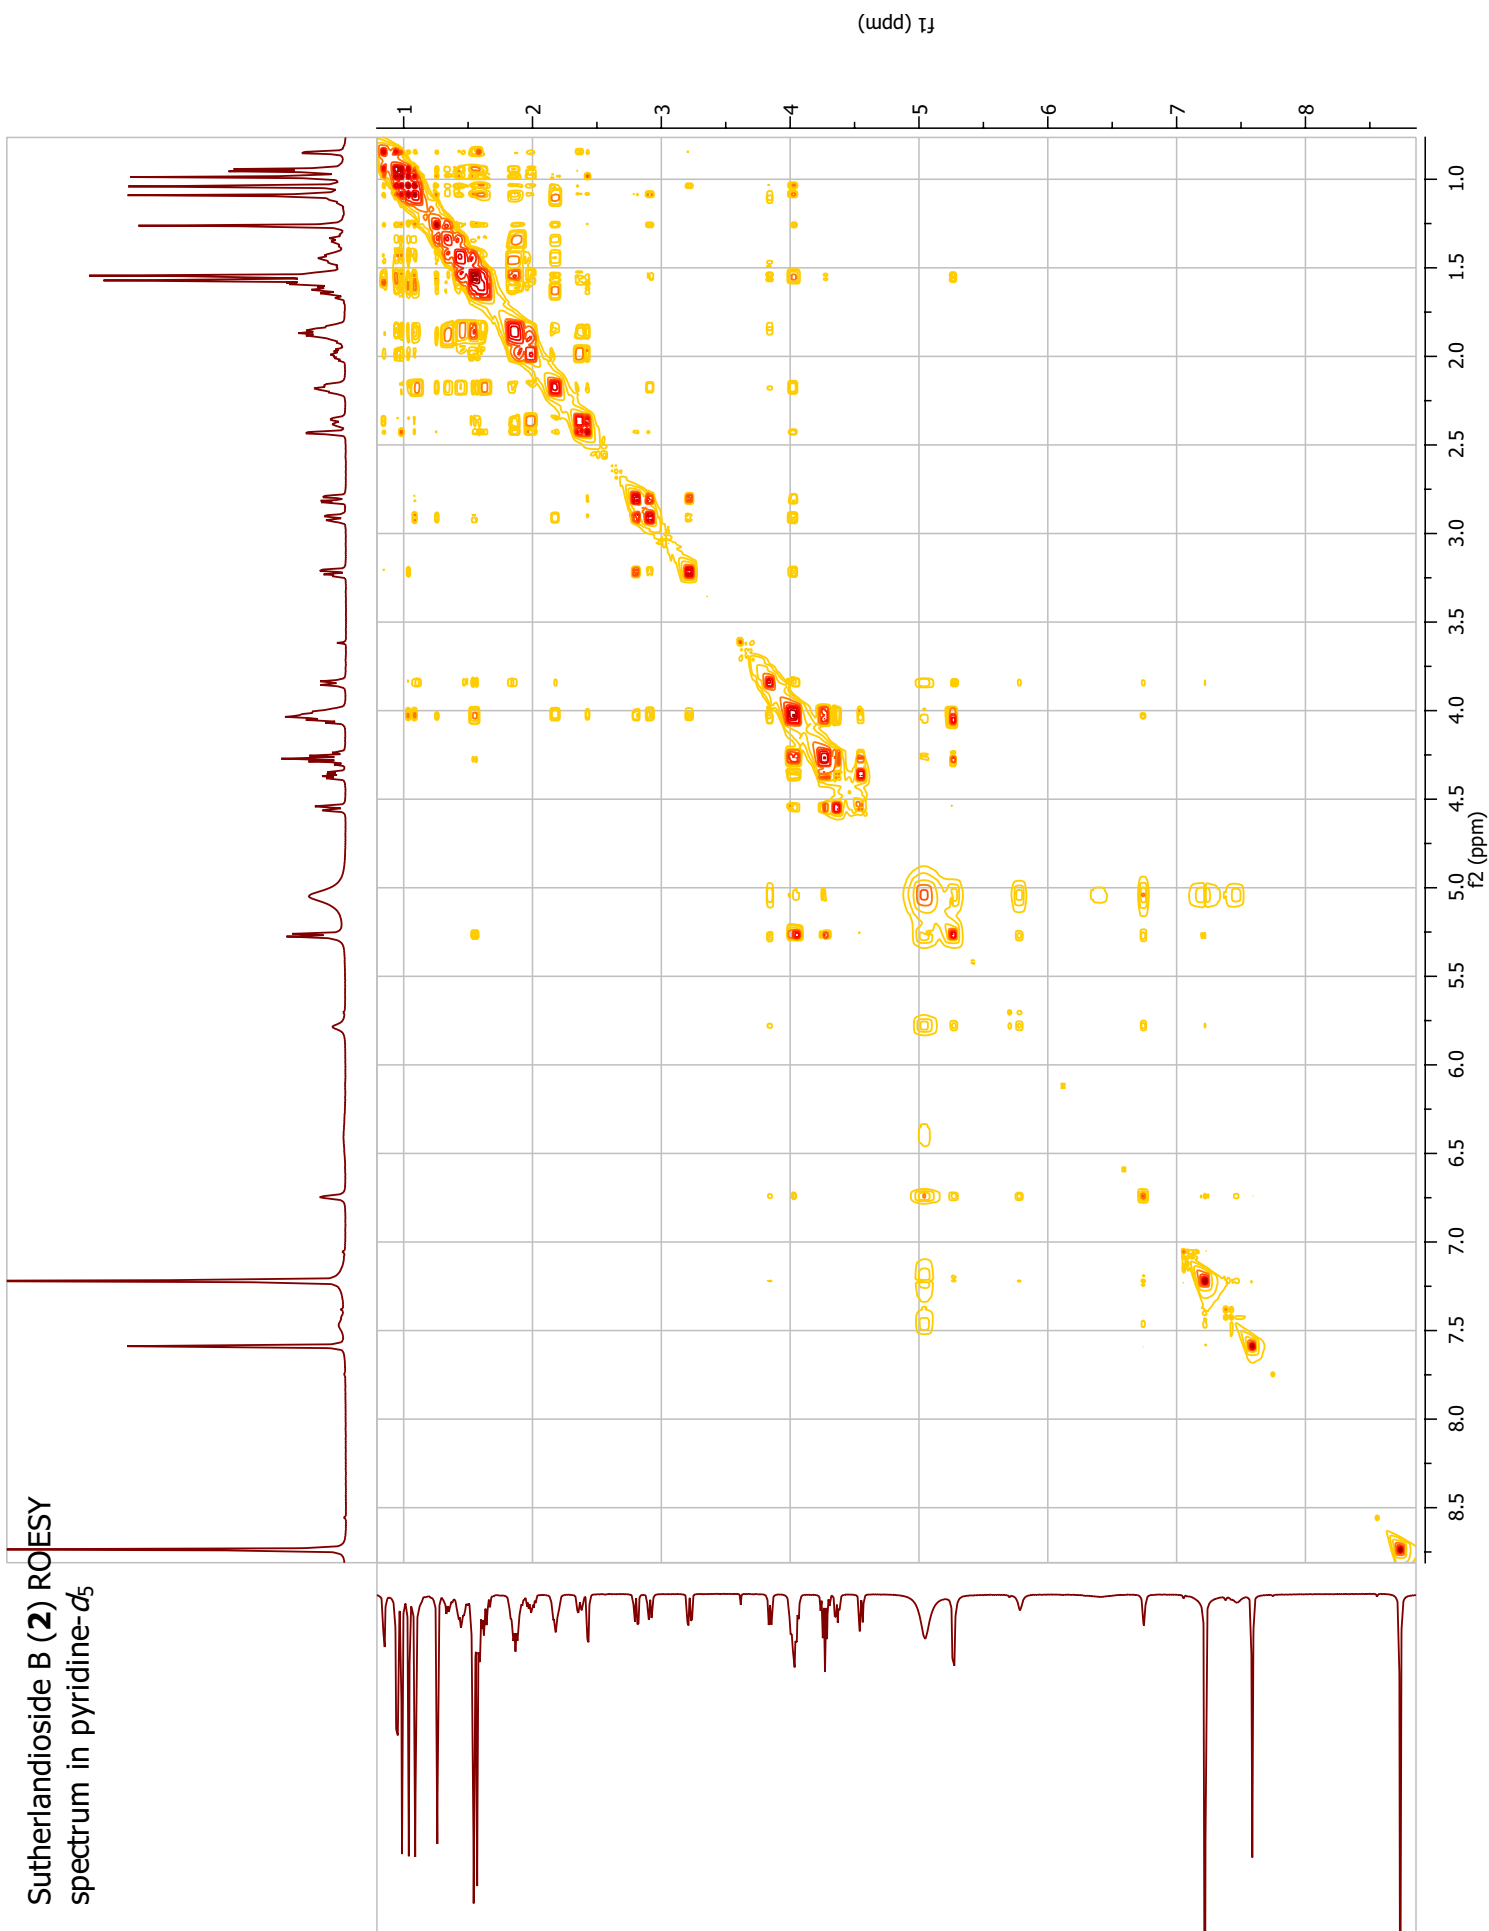

Sutherlandioside B (**2**) expanded  
ROESY spectrum in pyridine-*d*<sub>5</sub>

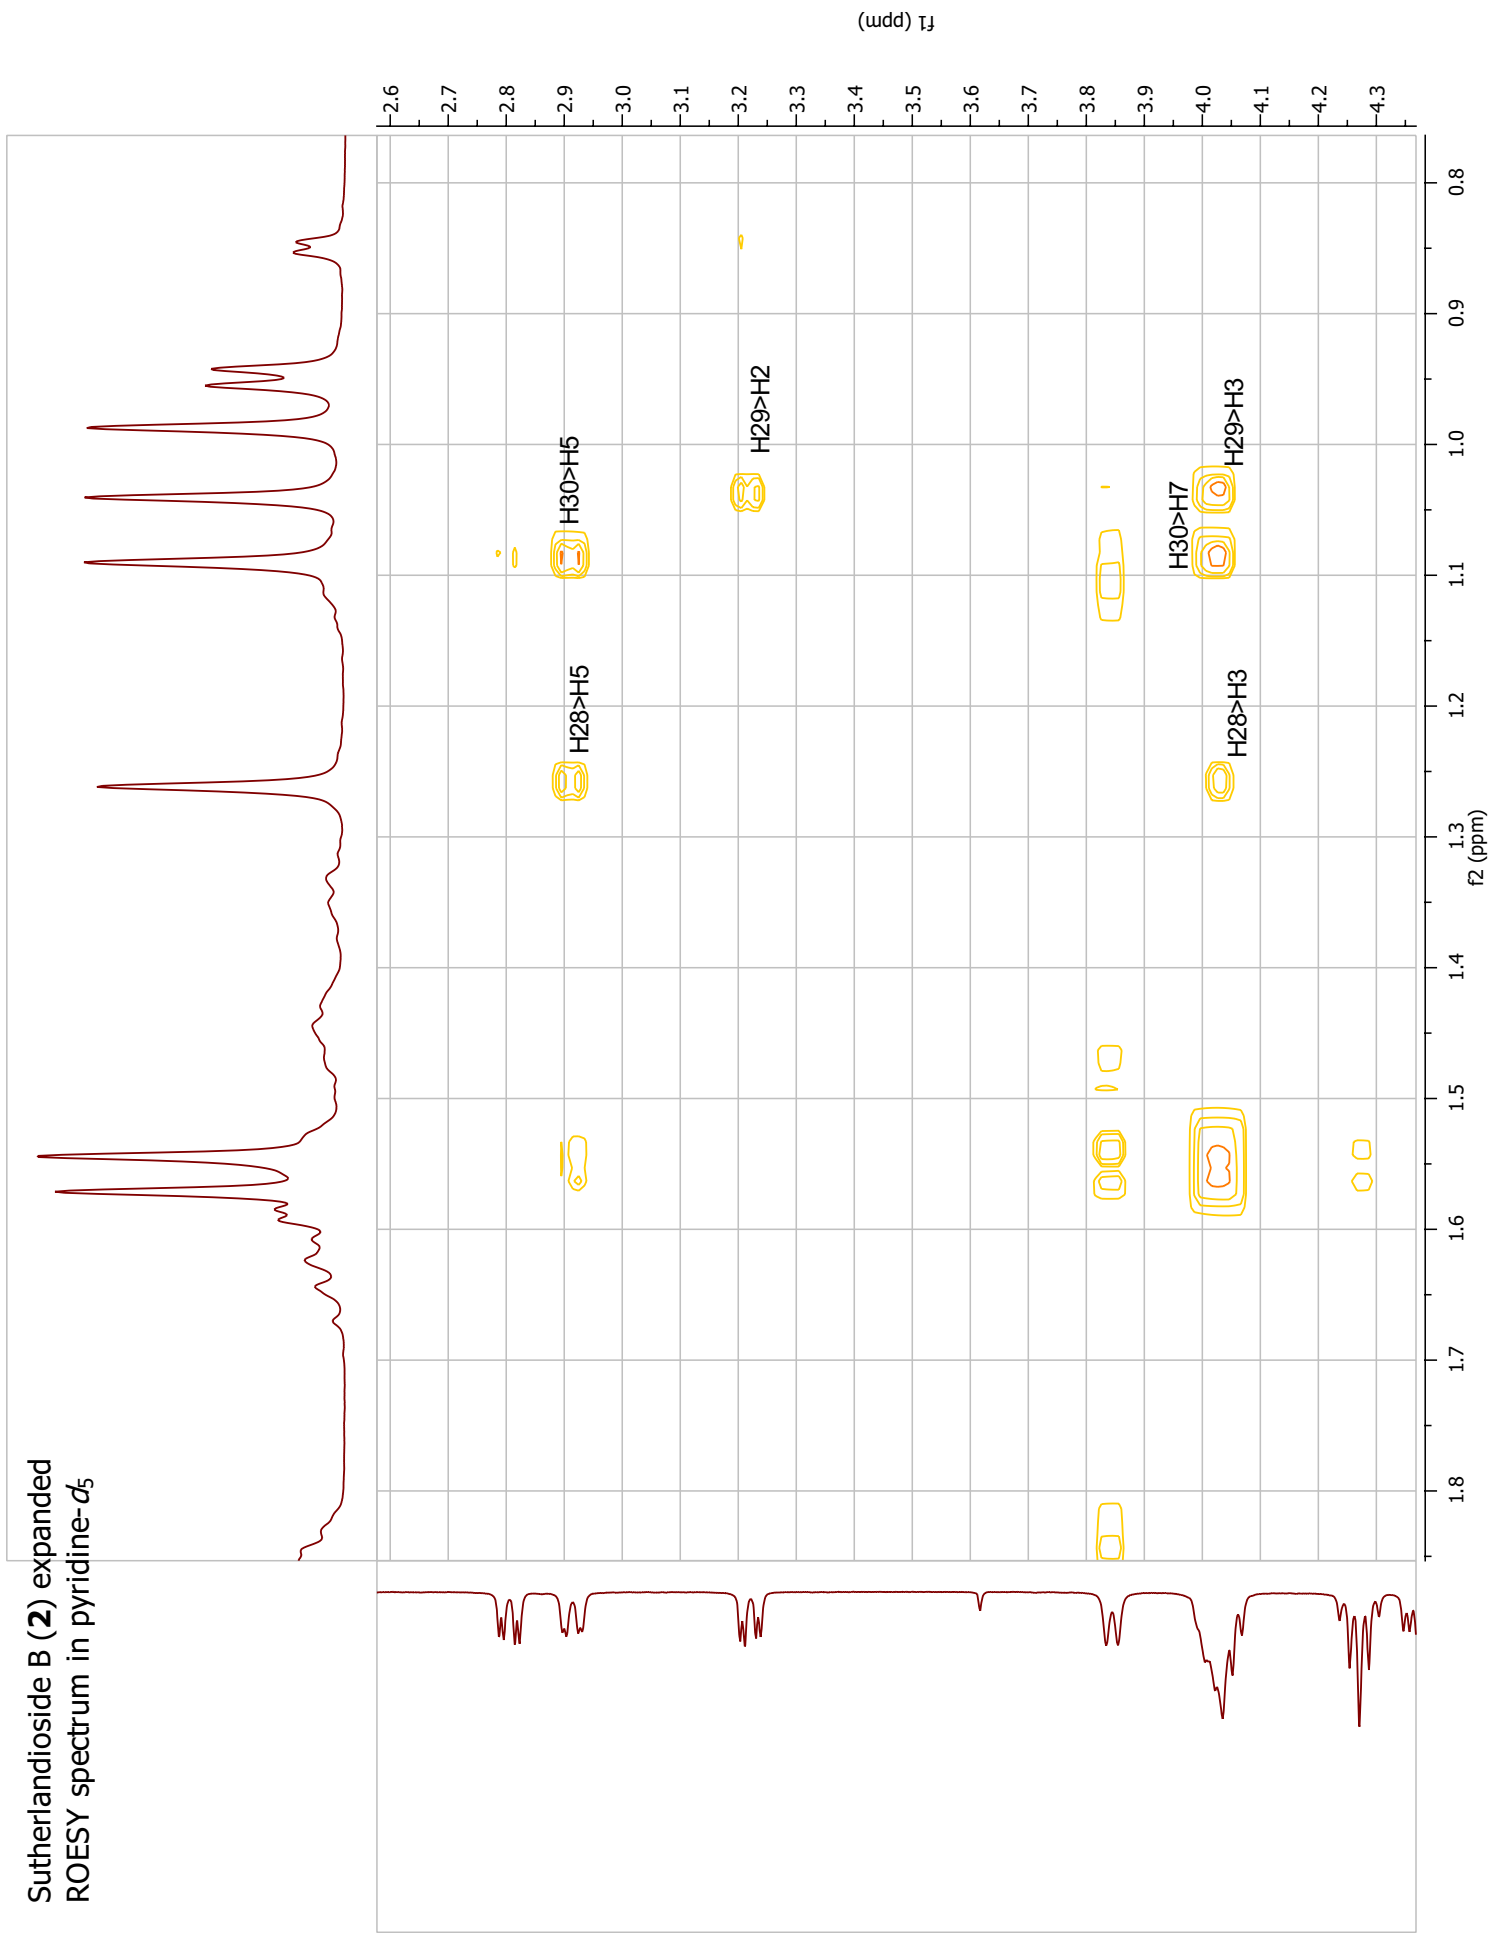

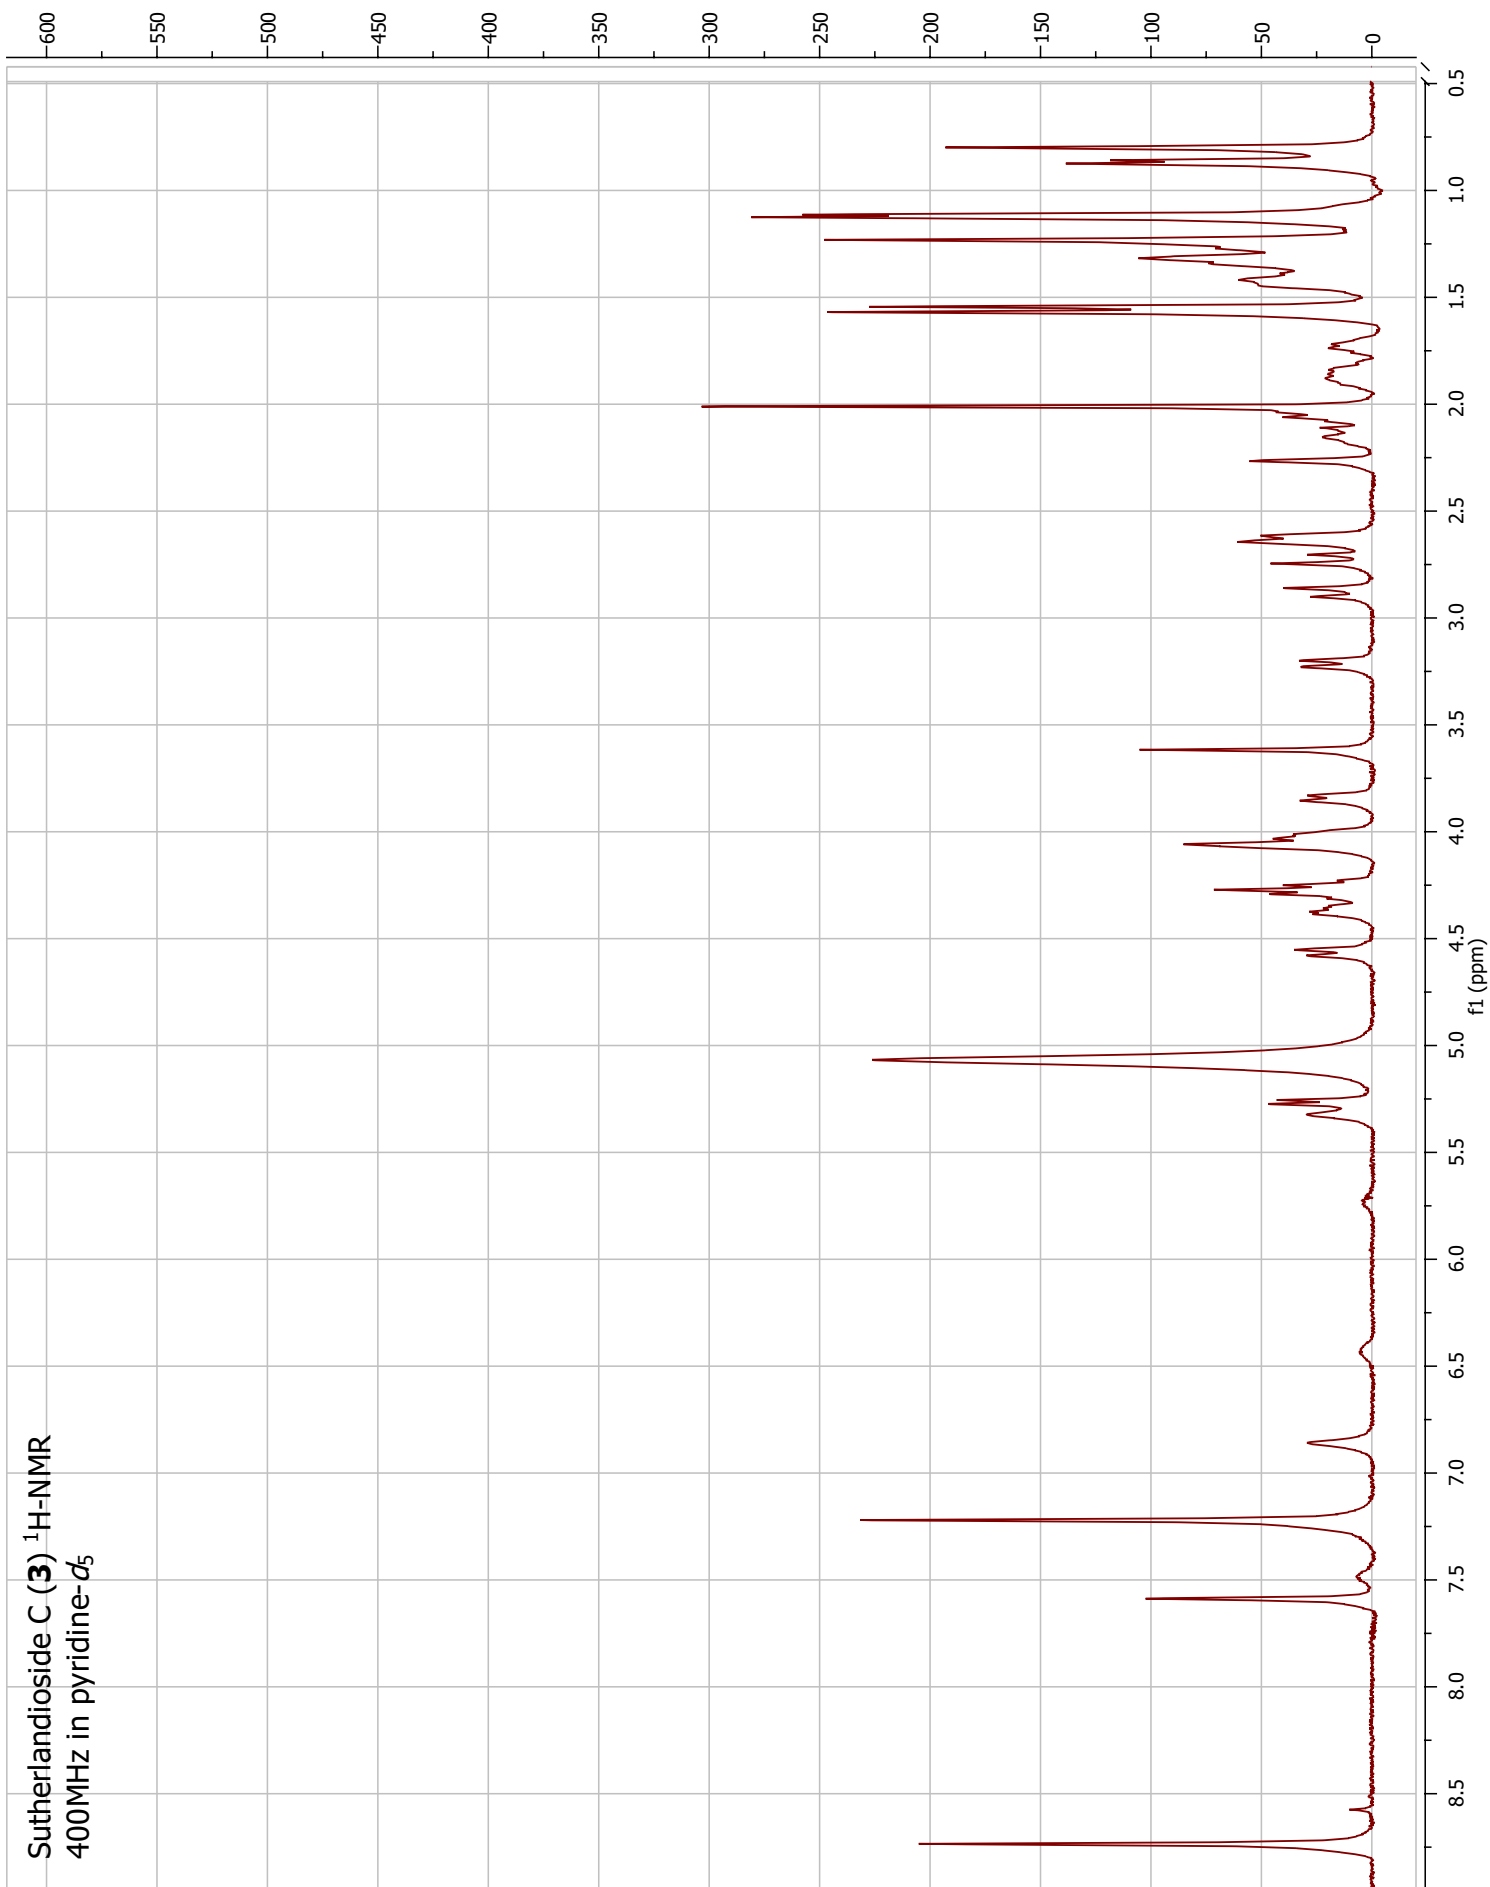

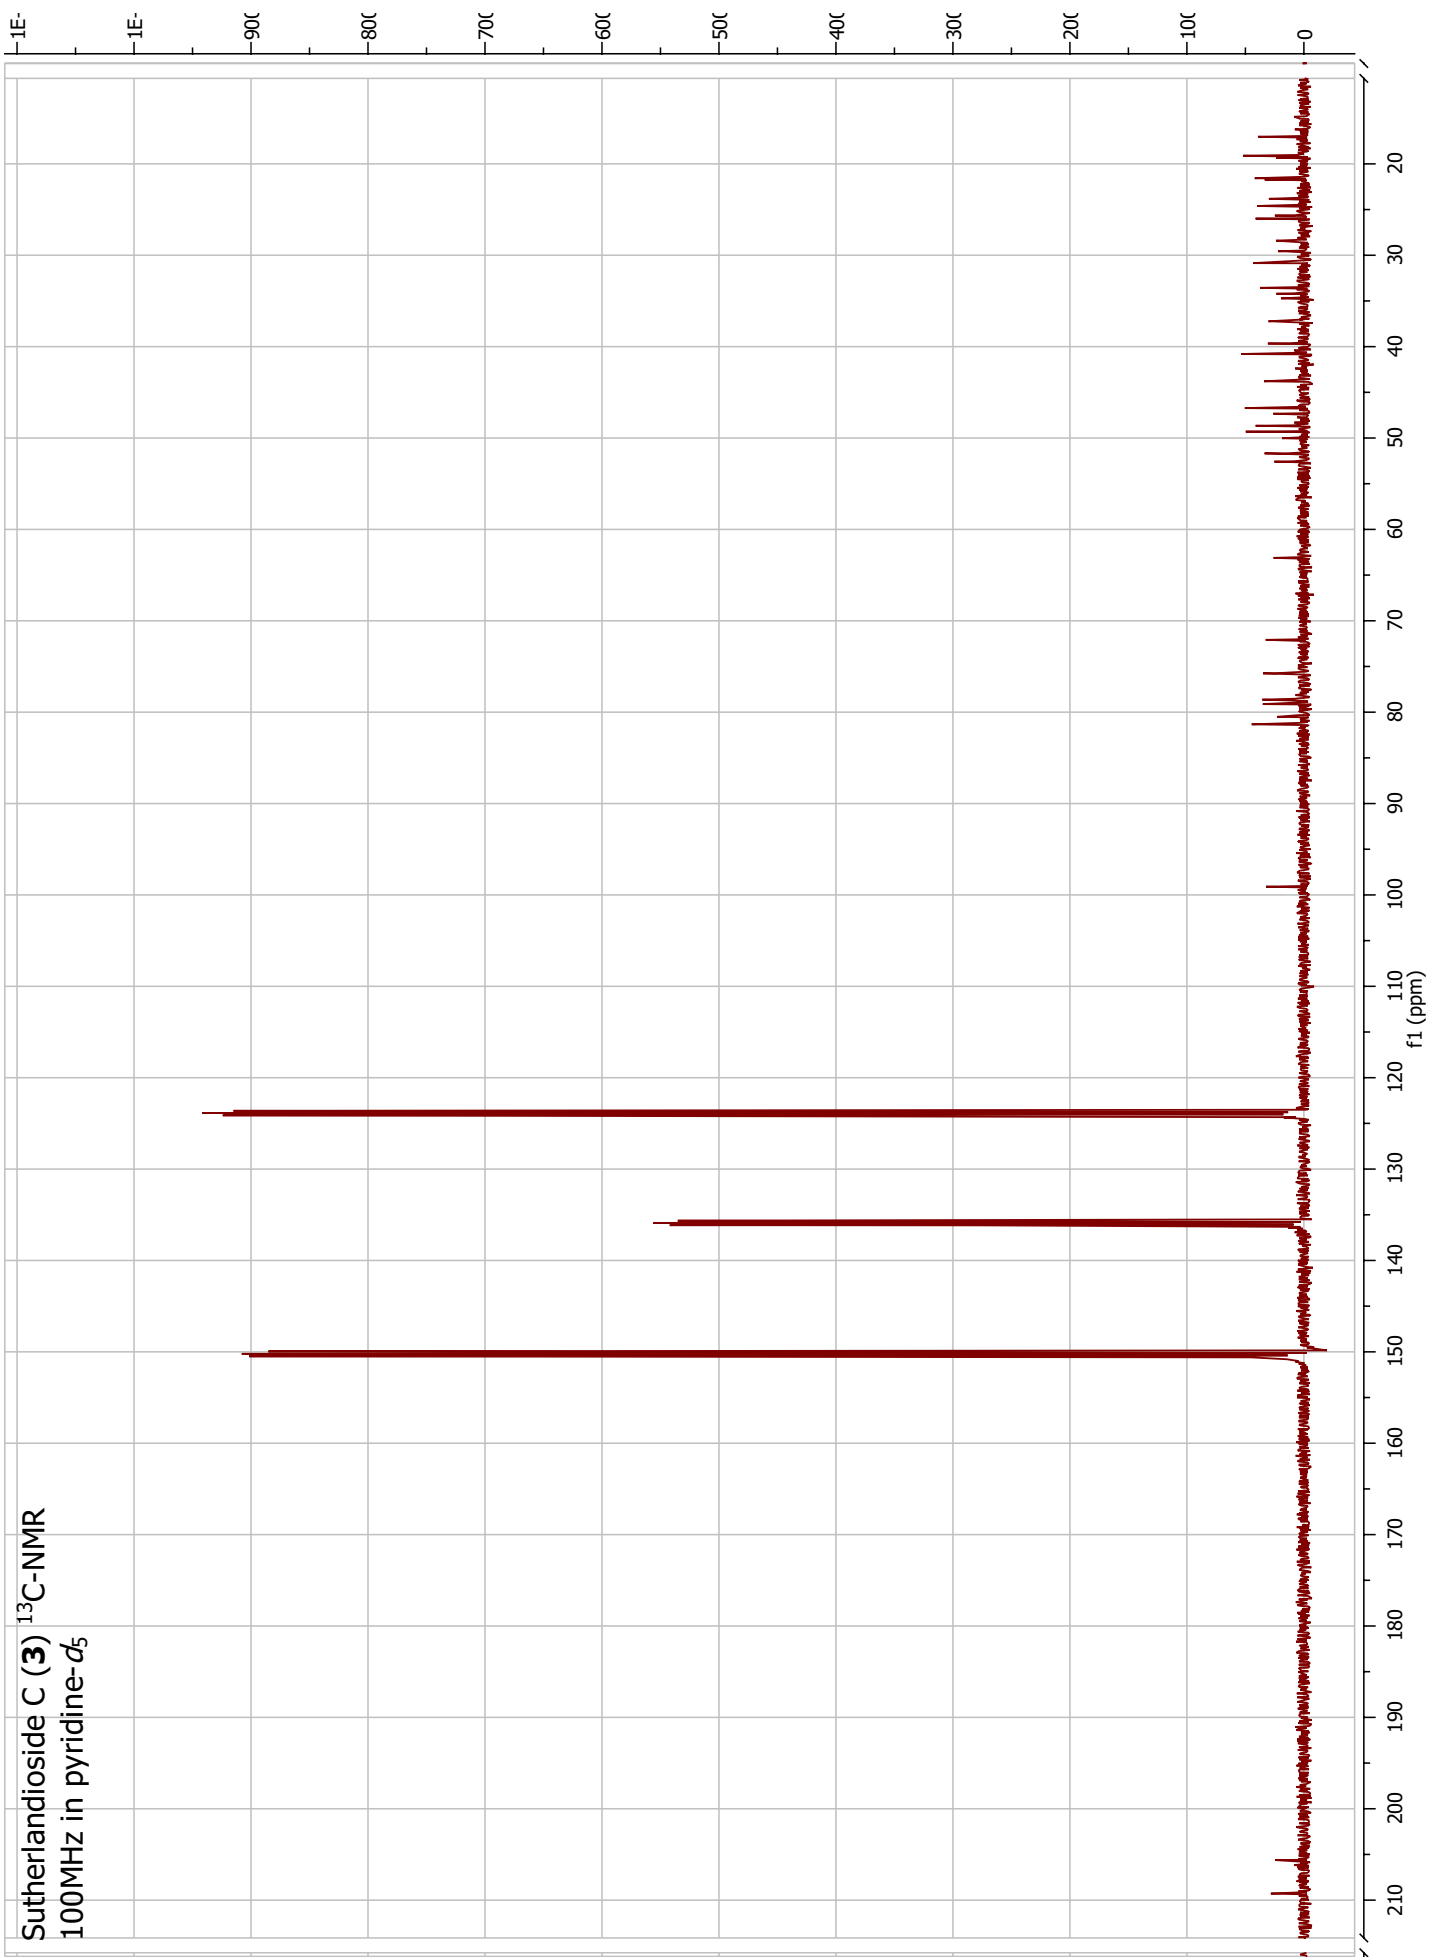

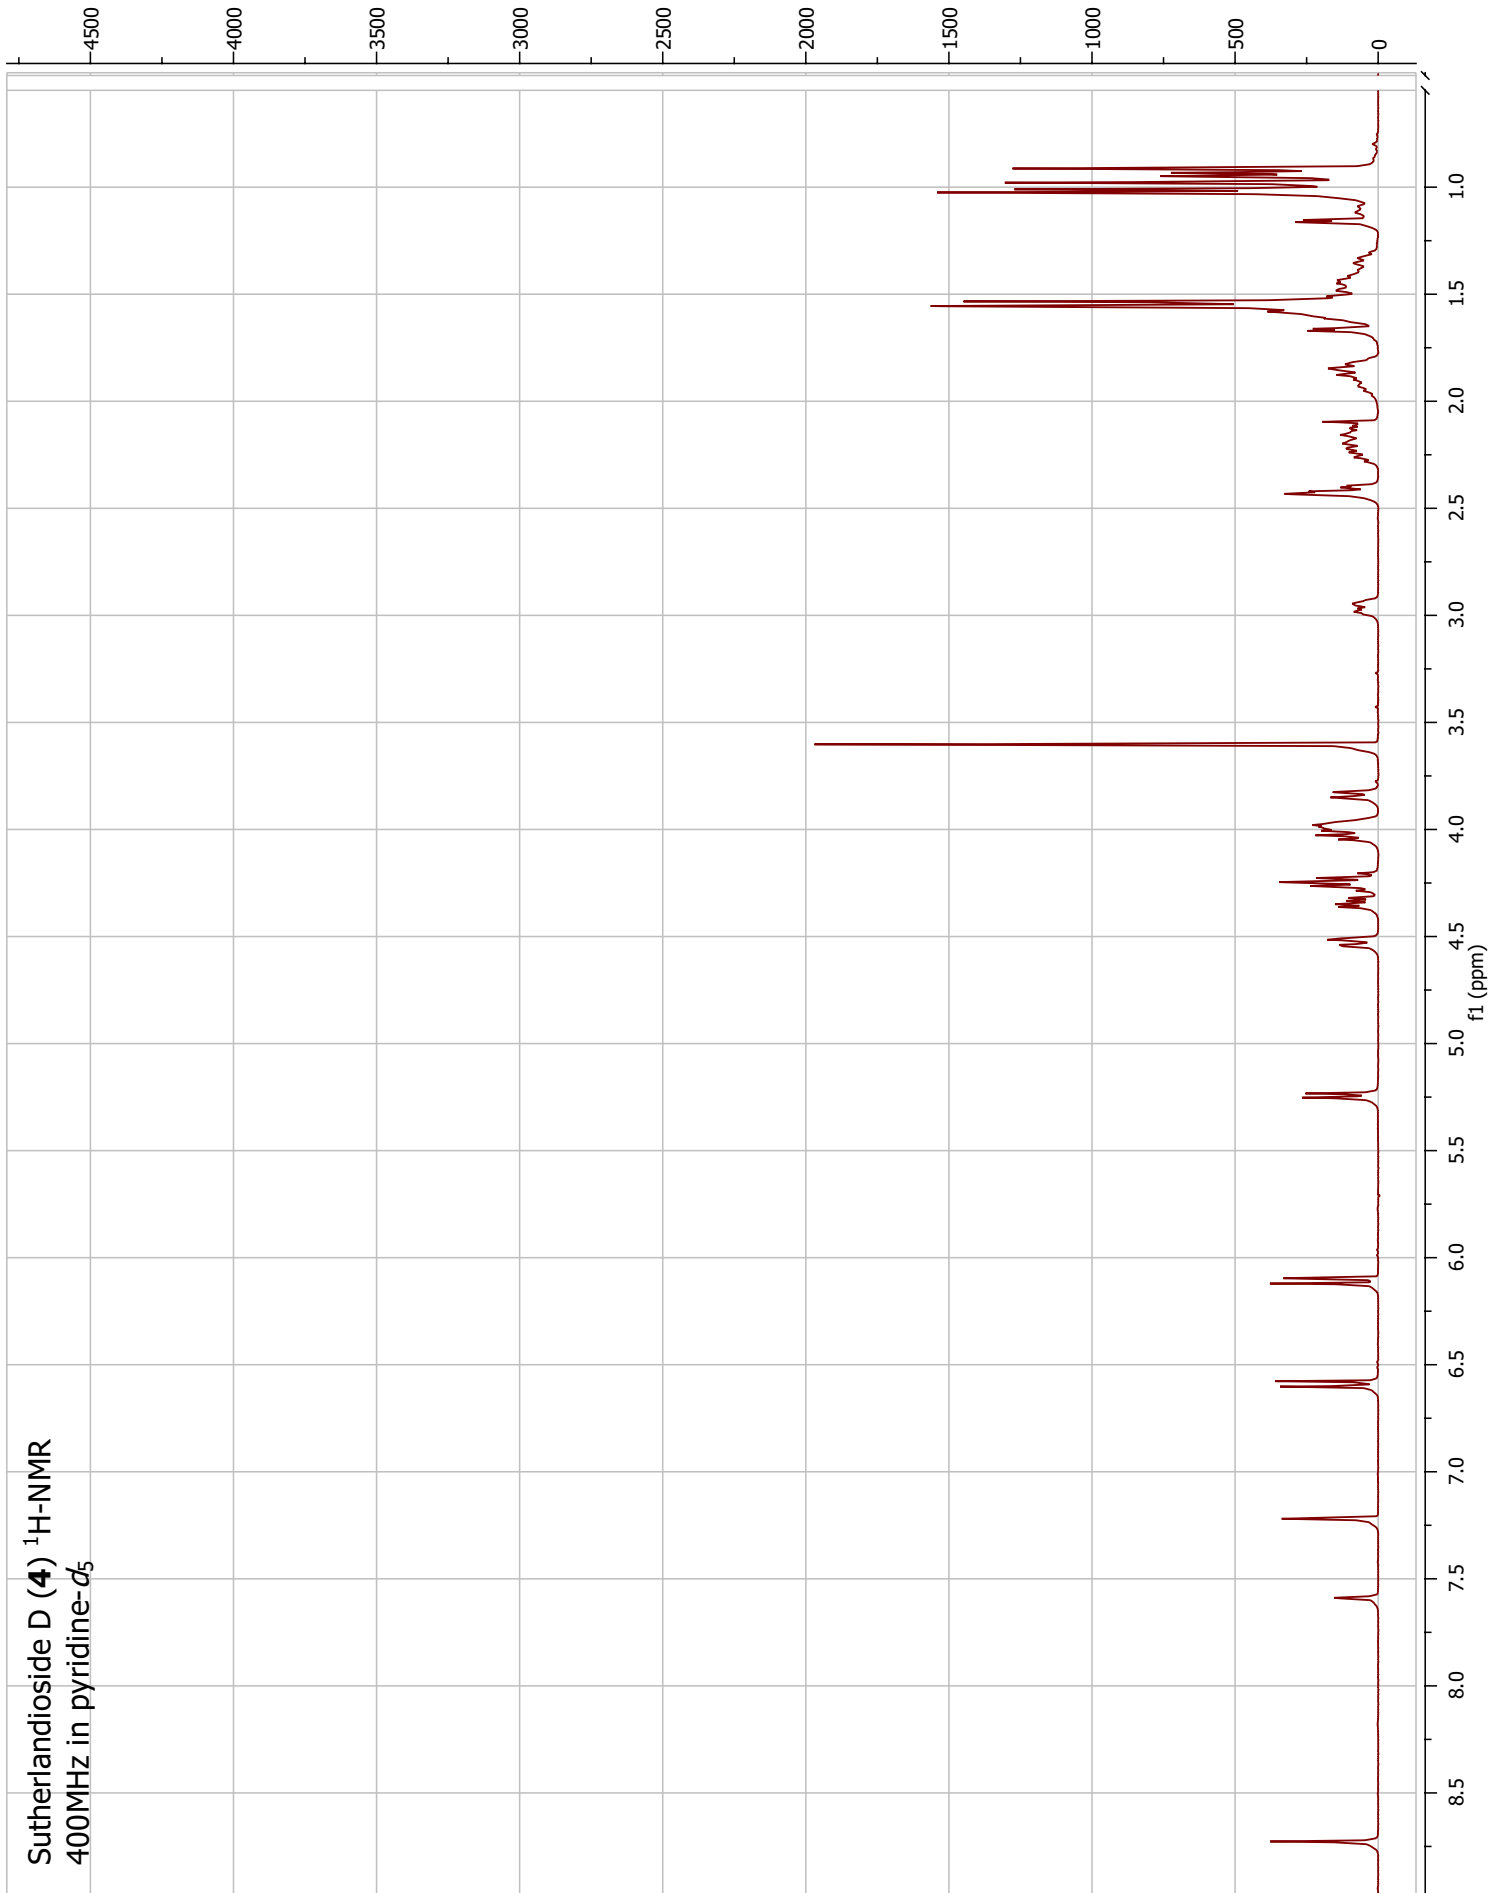

Sutherlandioside D (**4**) <sup>13</sup>C-NMR  
100MHz in pyridine-*d*<sub>5</sub>

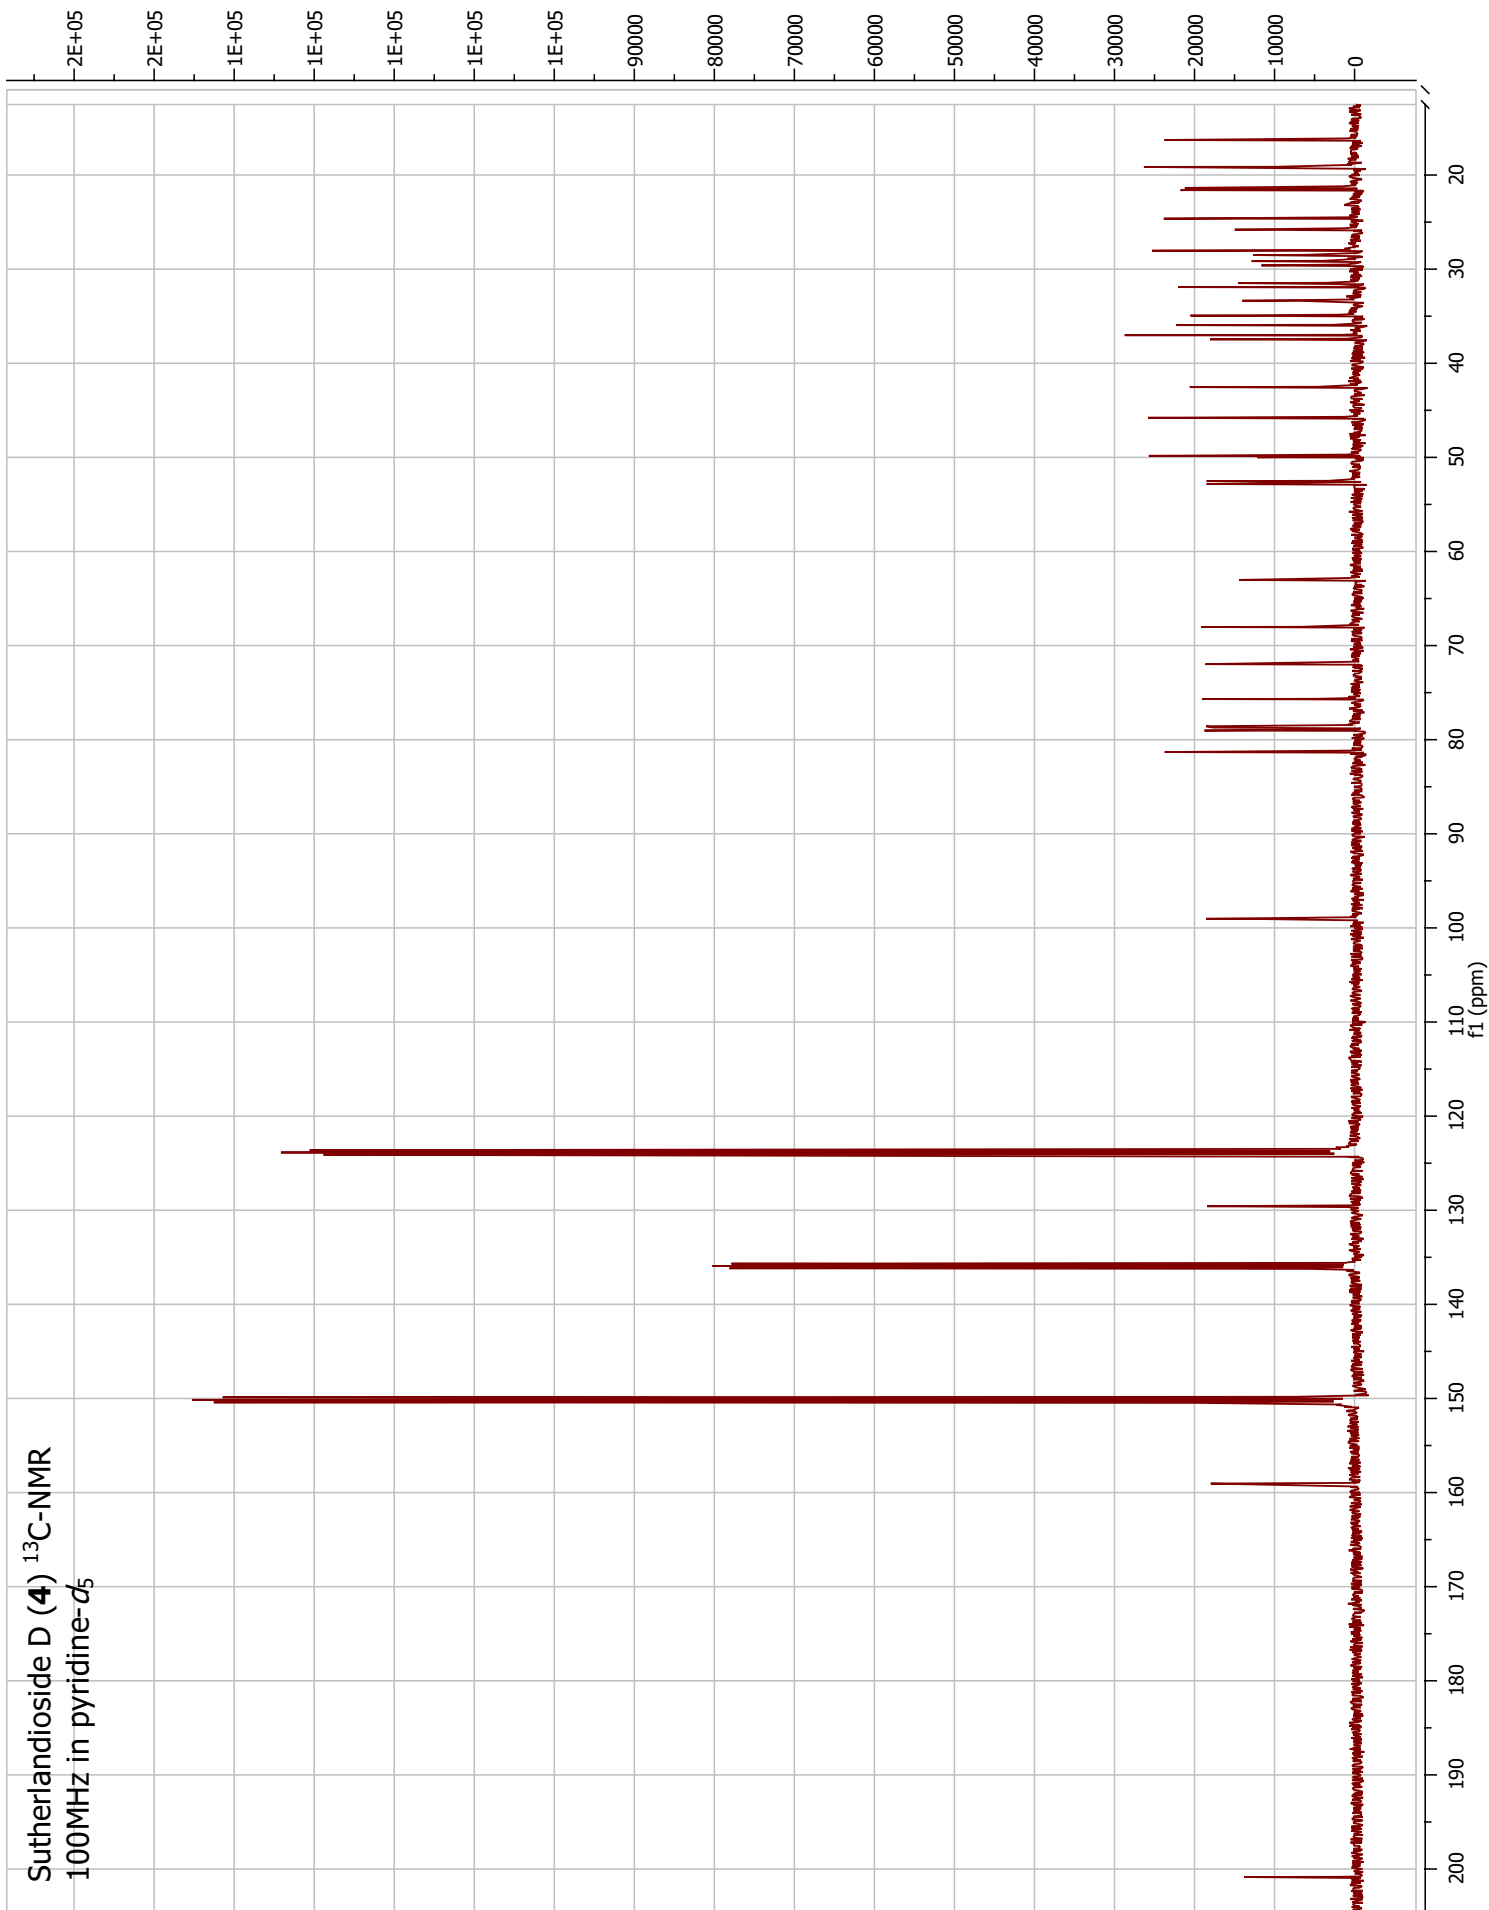

Sutherlandioside D (4) DEPT  
spectrum in pyridine-*d*<sub>5</sub>

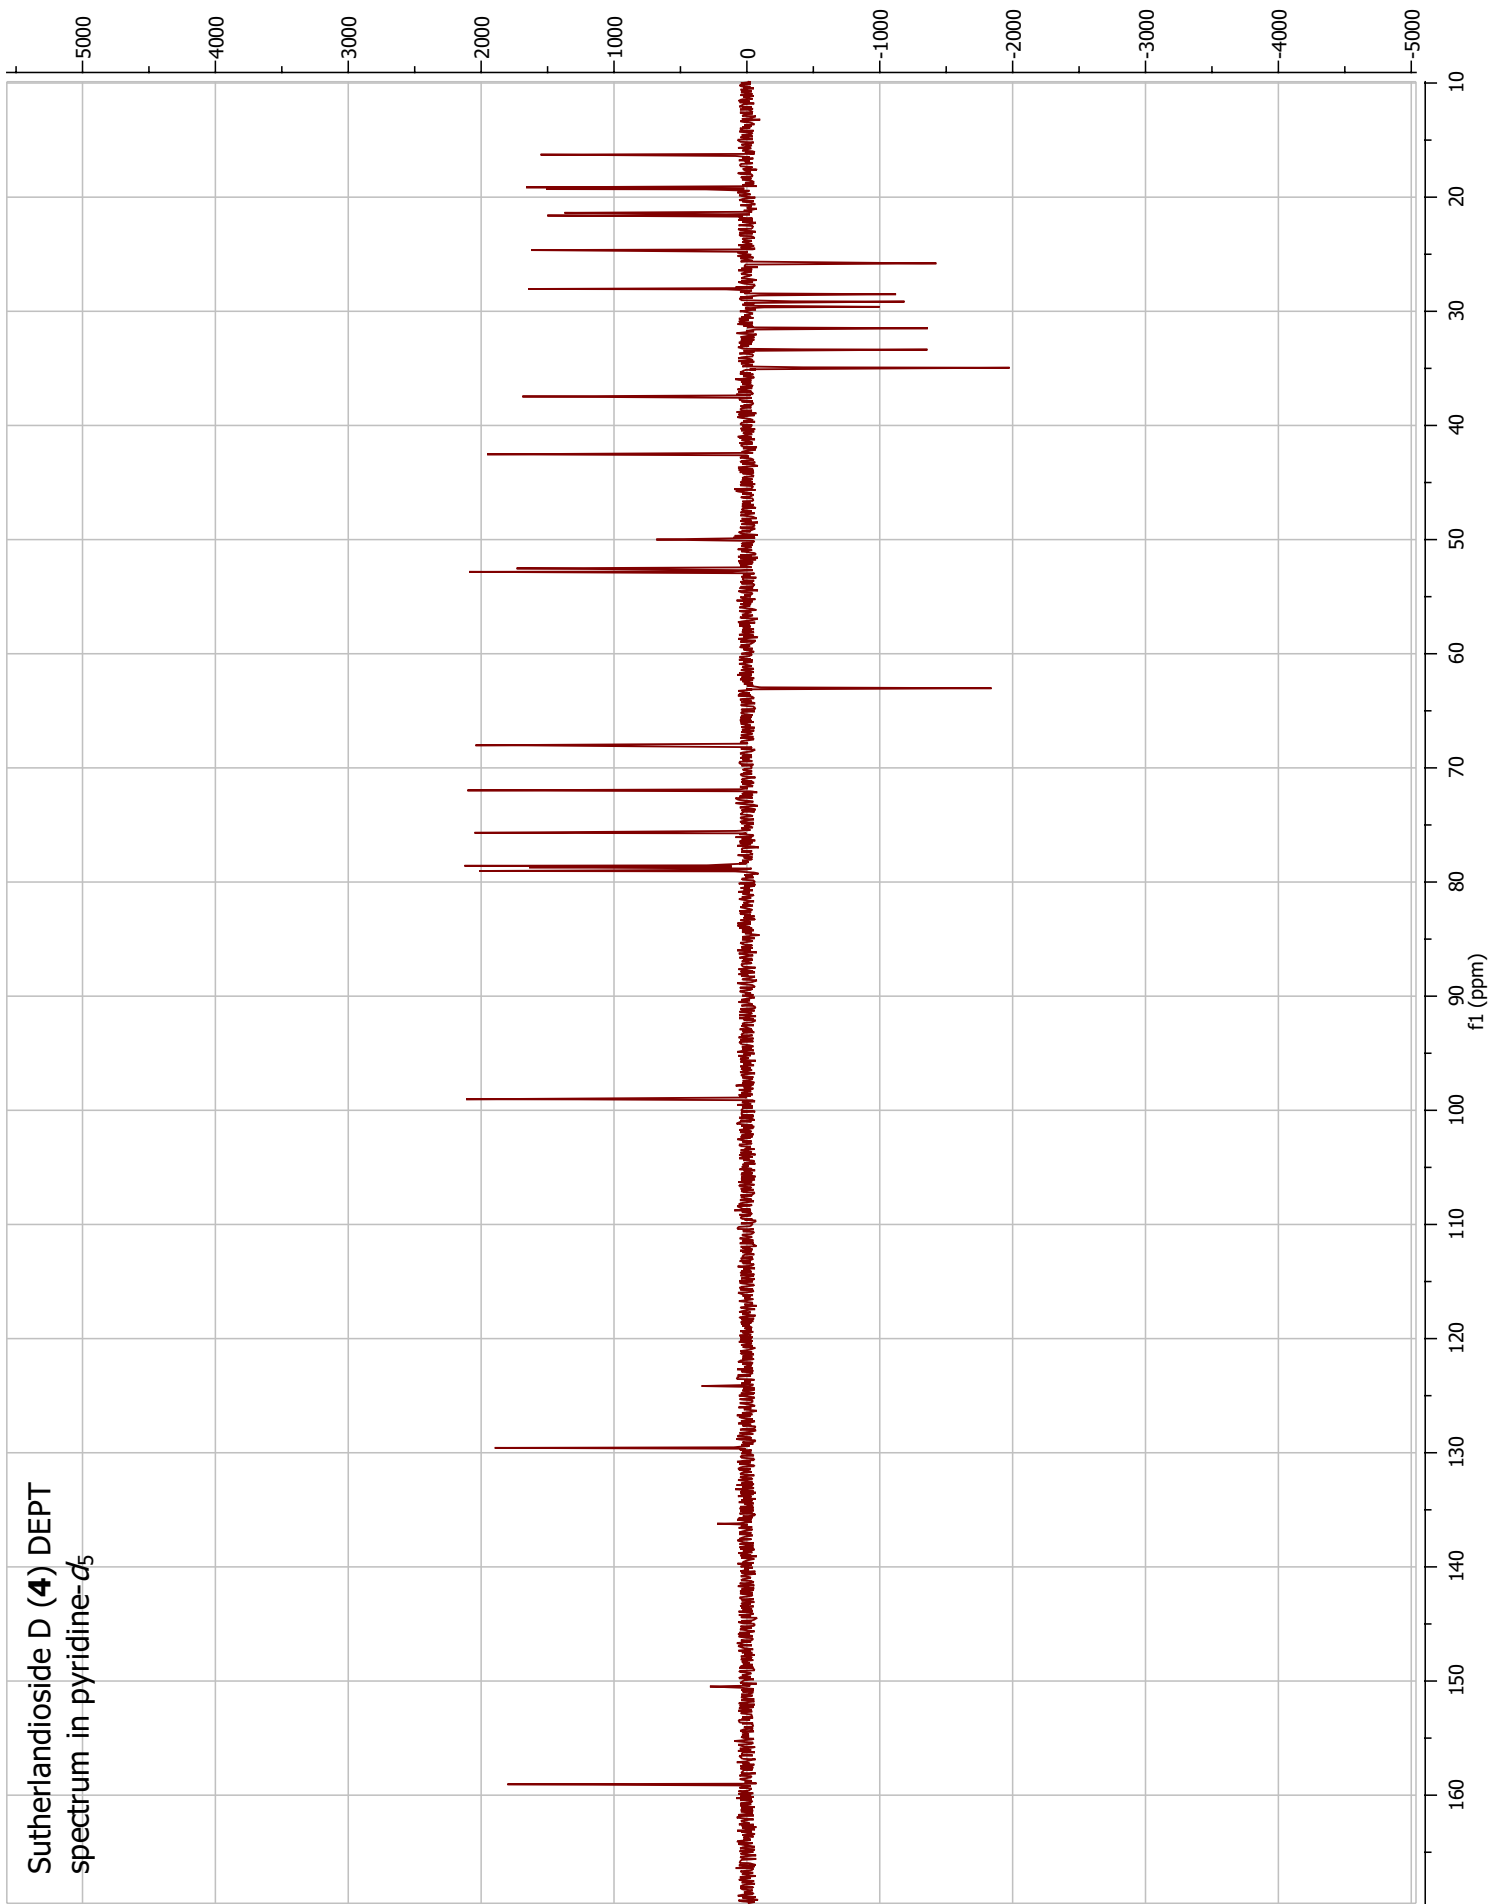



Sutherlandioside D (4) COSY spectrum in pyridine-*d*<sub>5</sub>

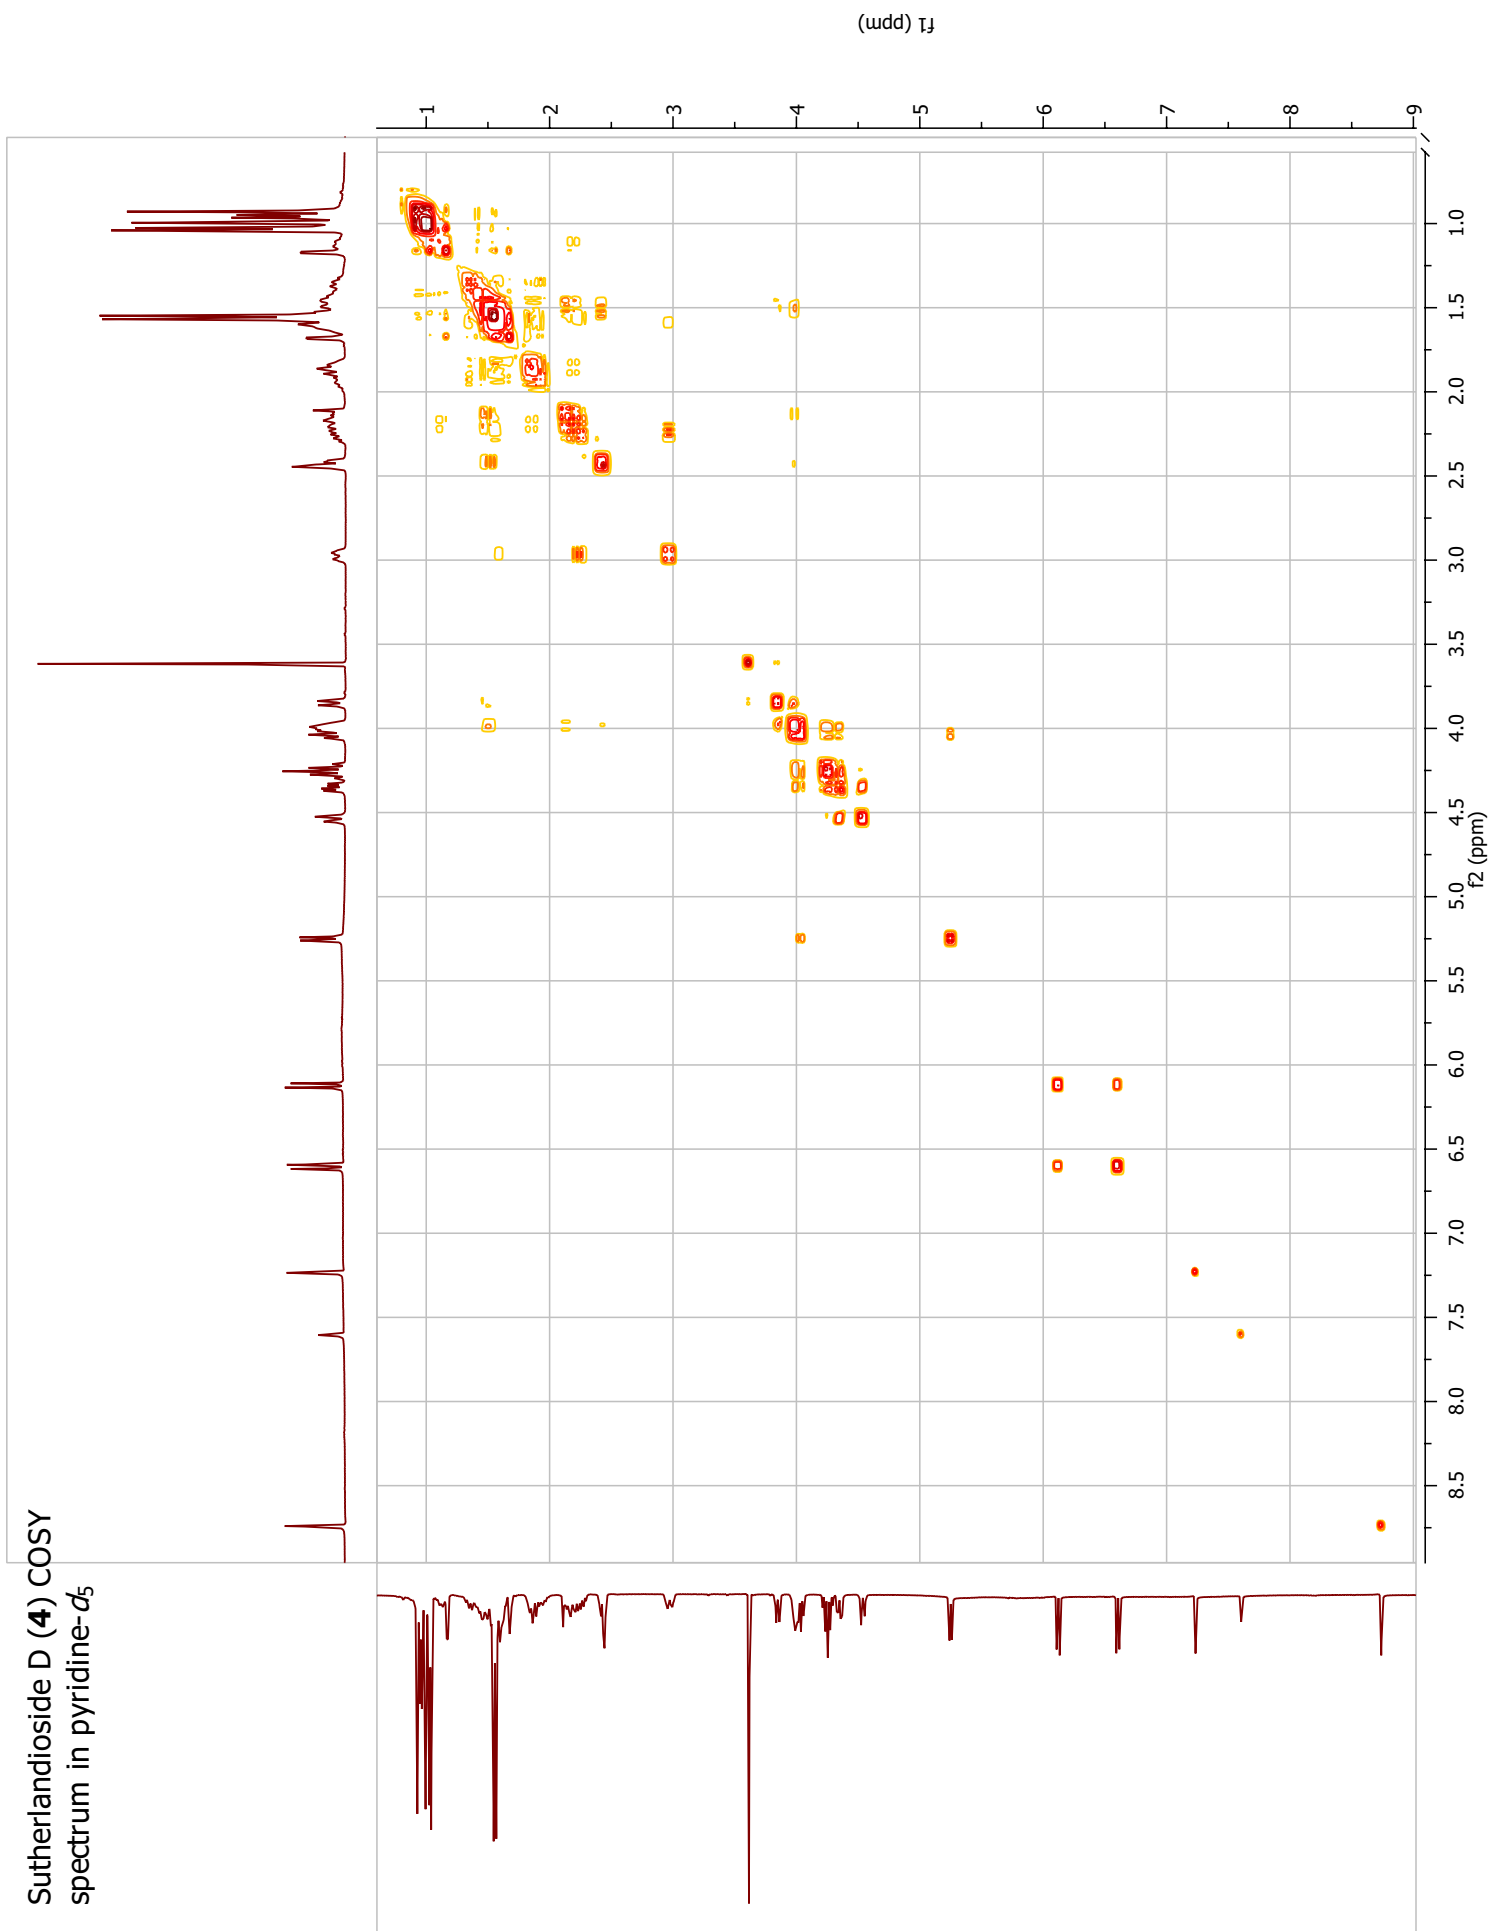

Sutherlandioside D (**4**) HMQC  
spectrum in pyridine-*d*<sub>5</sub>

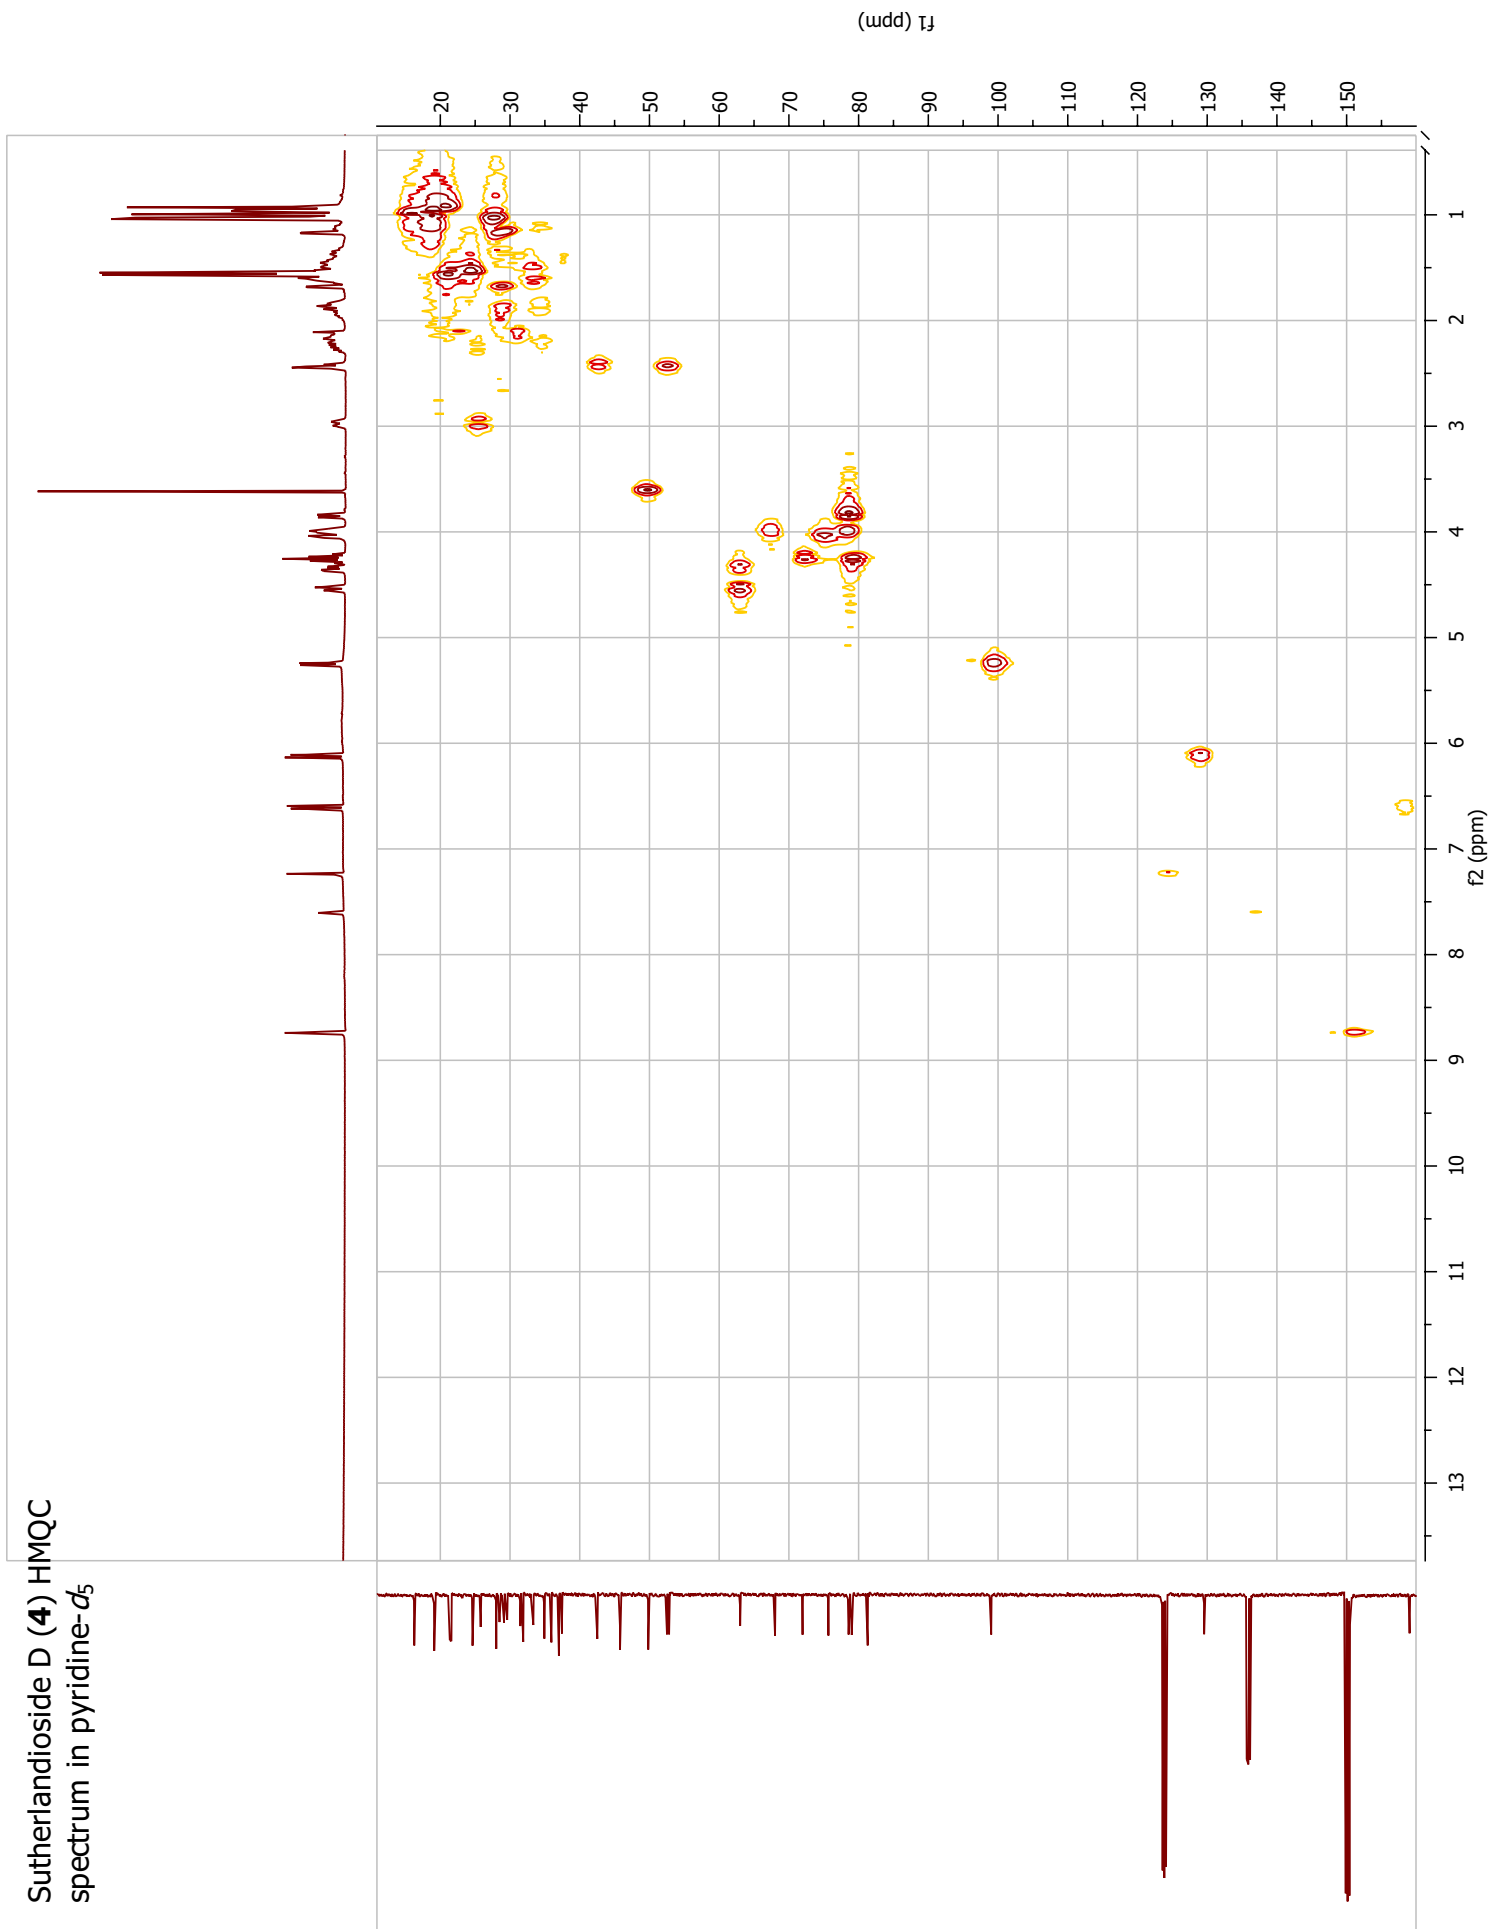

Sutherlandioside D (4) HMBC spectrum in pyridine-*d*<sub>5</sub>

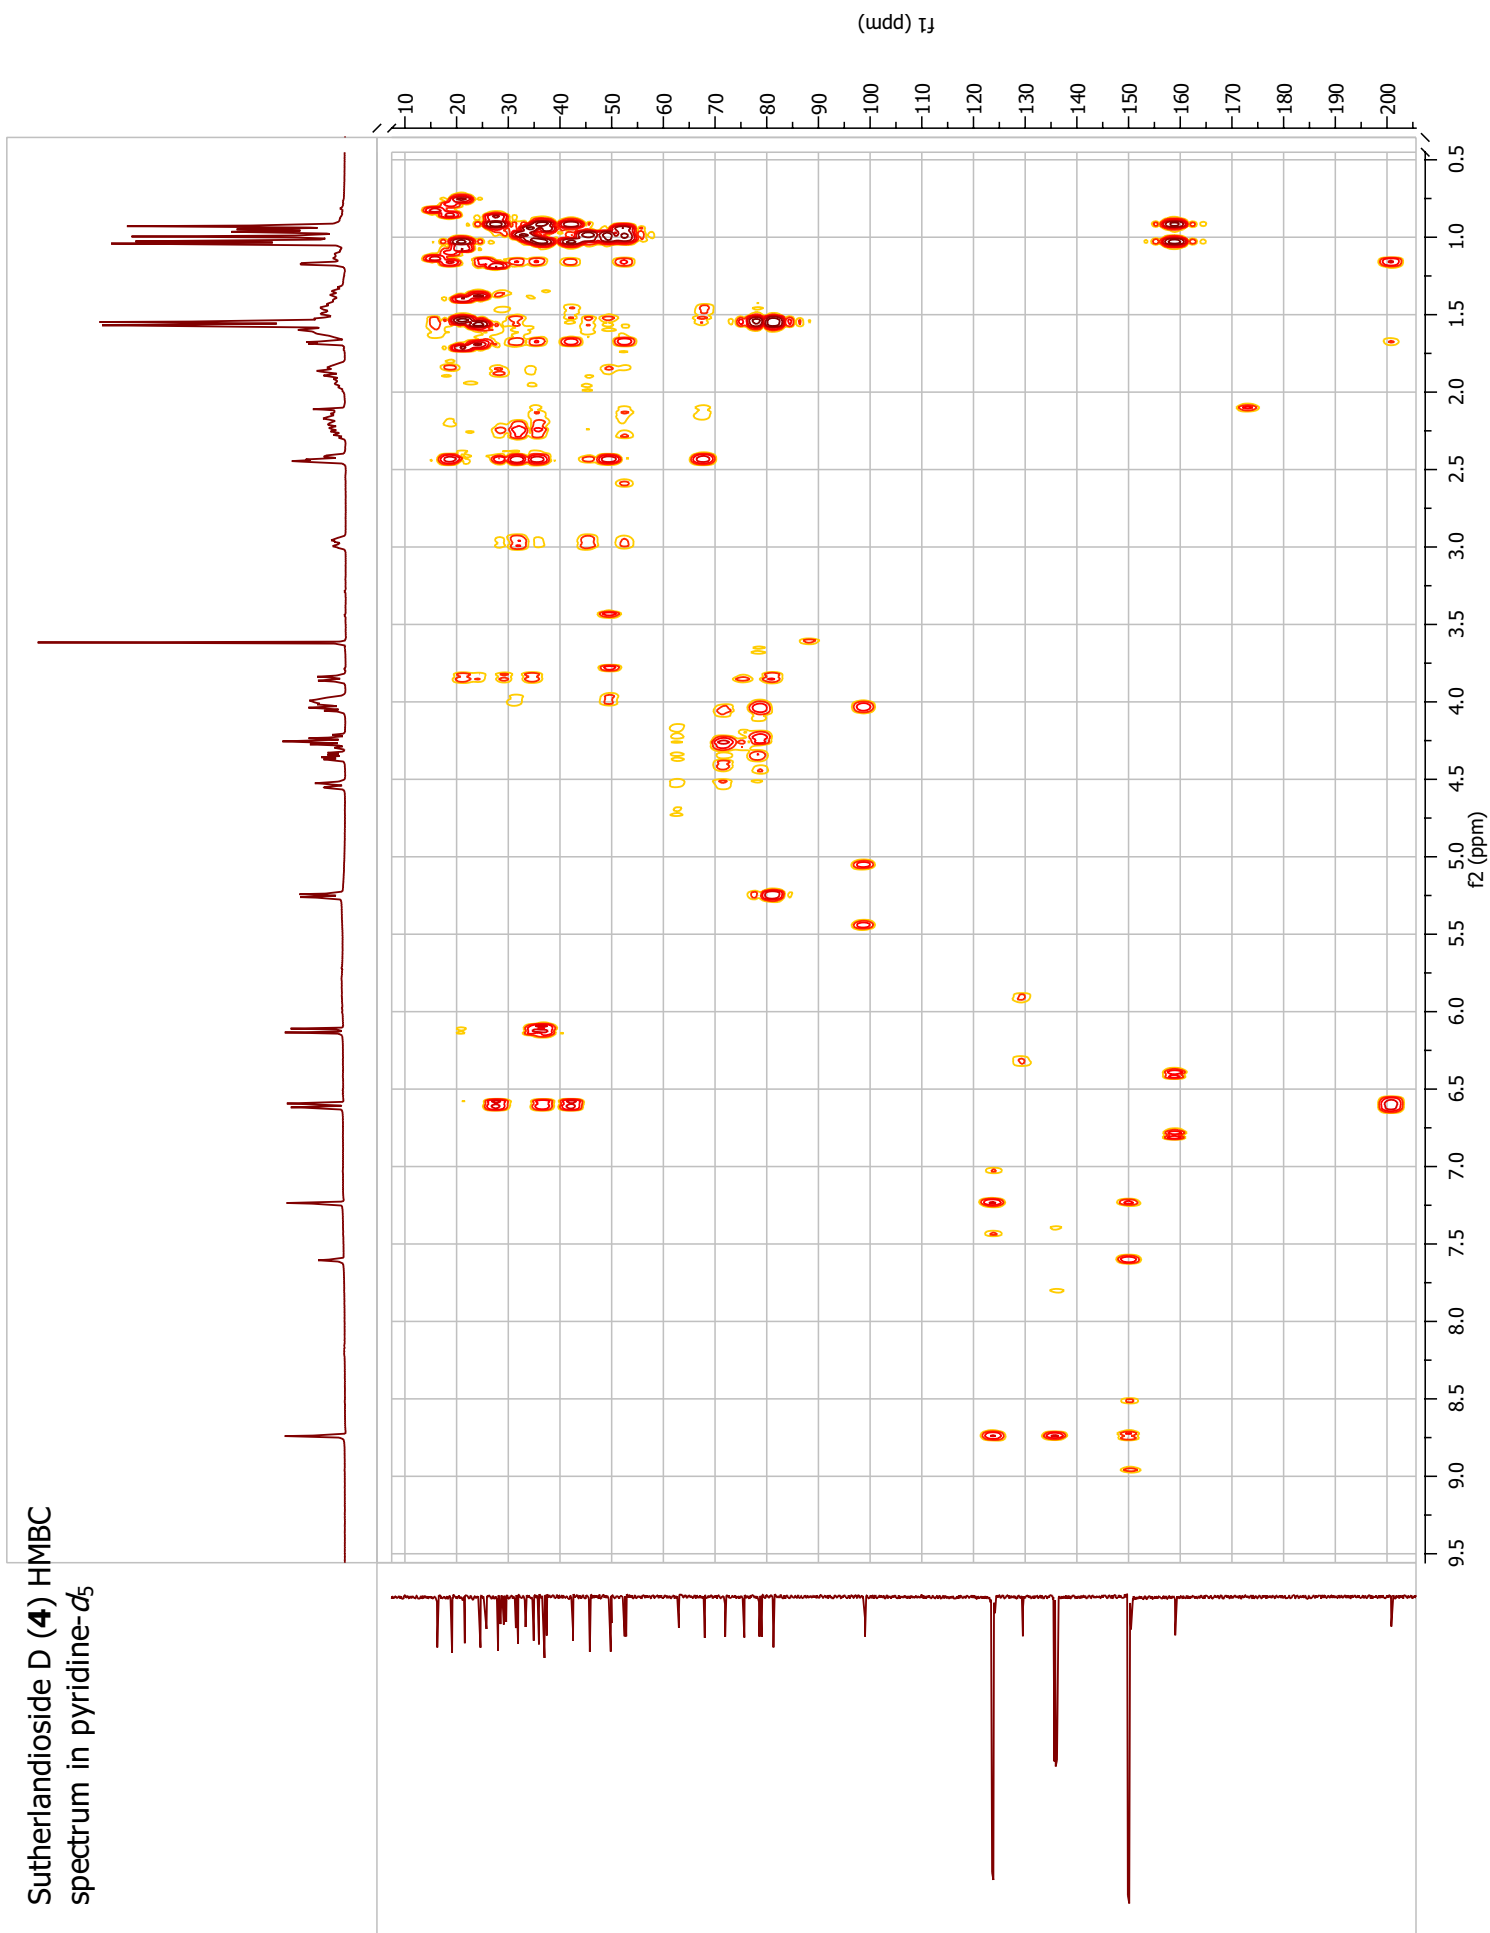

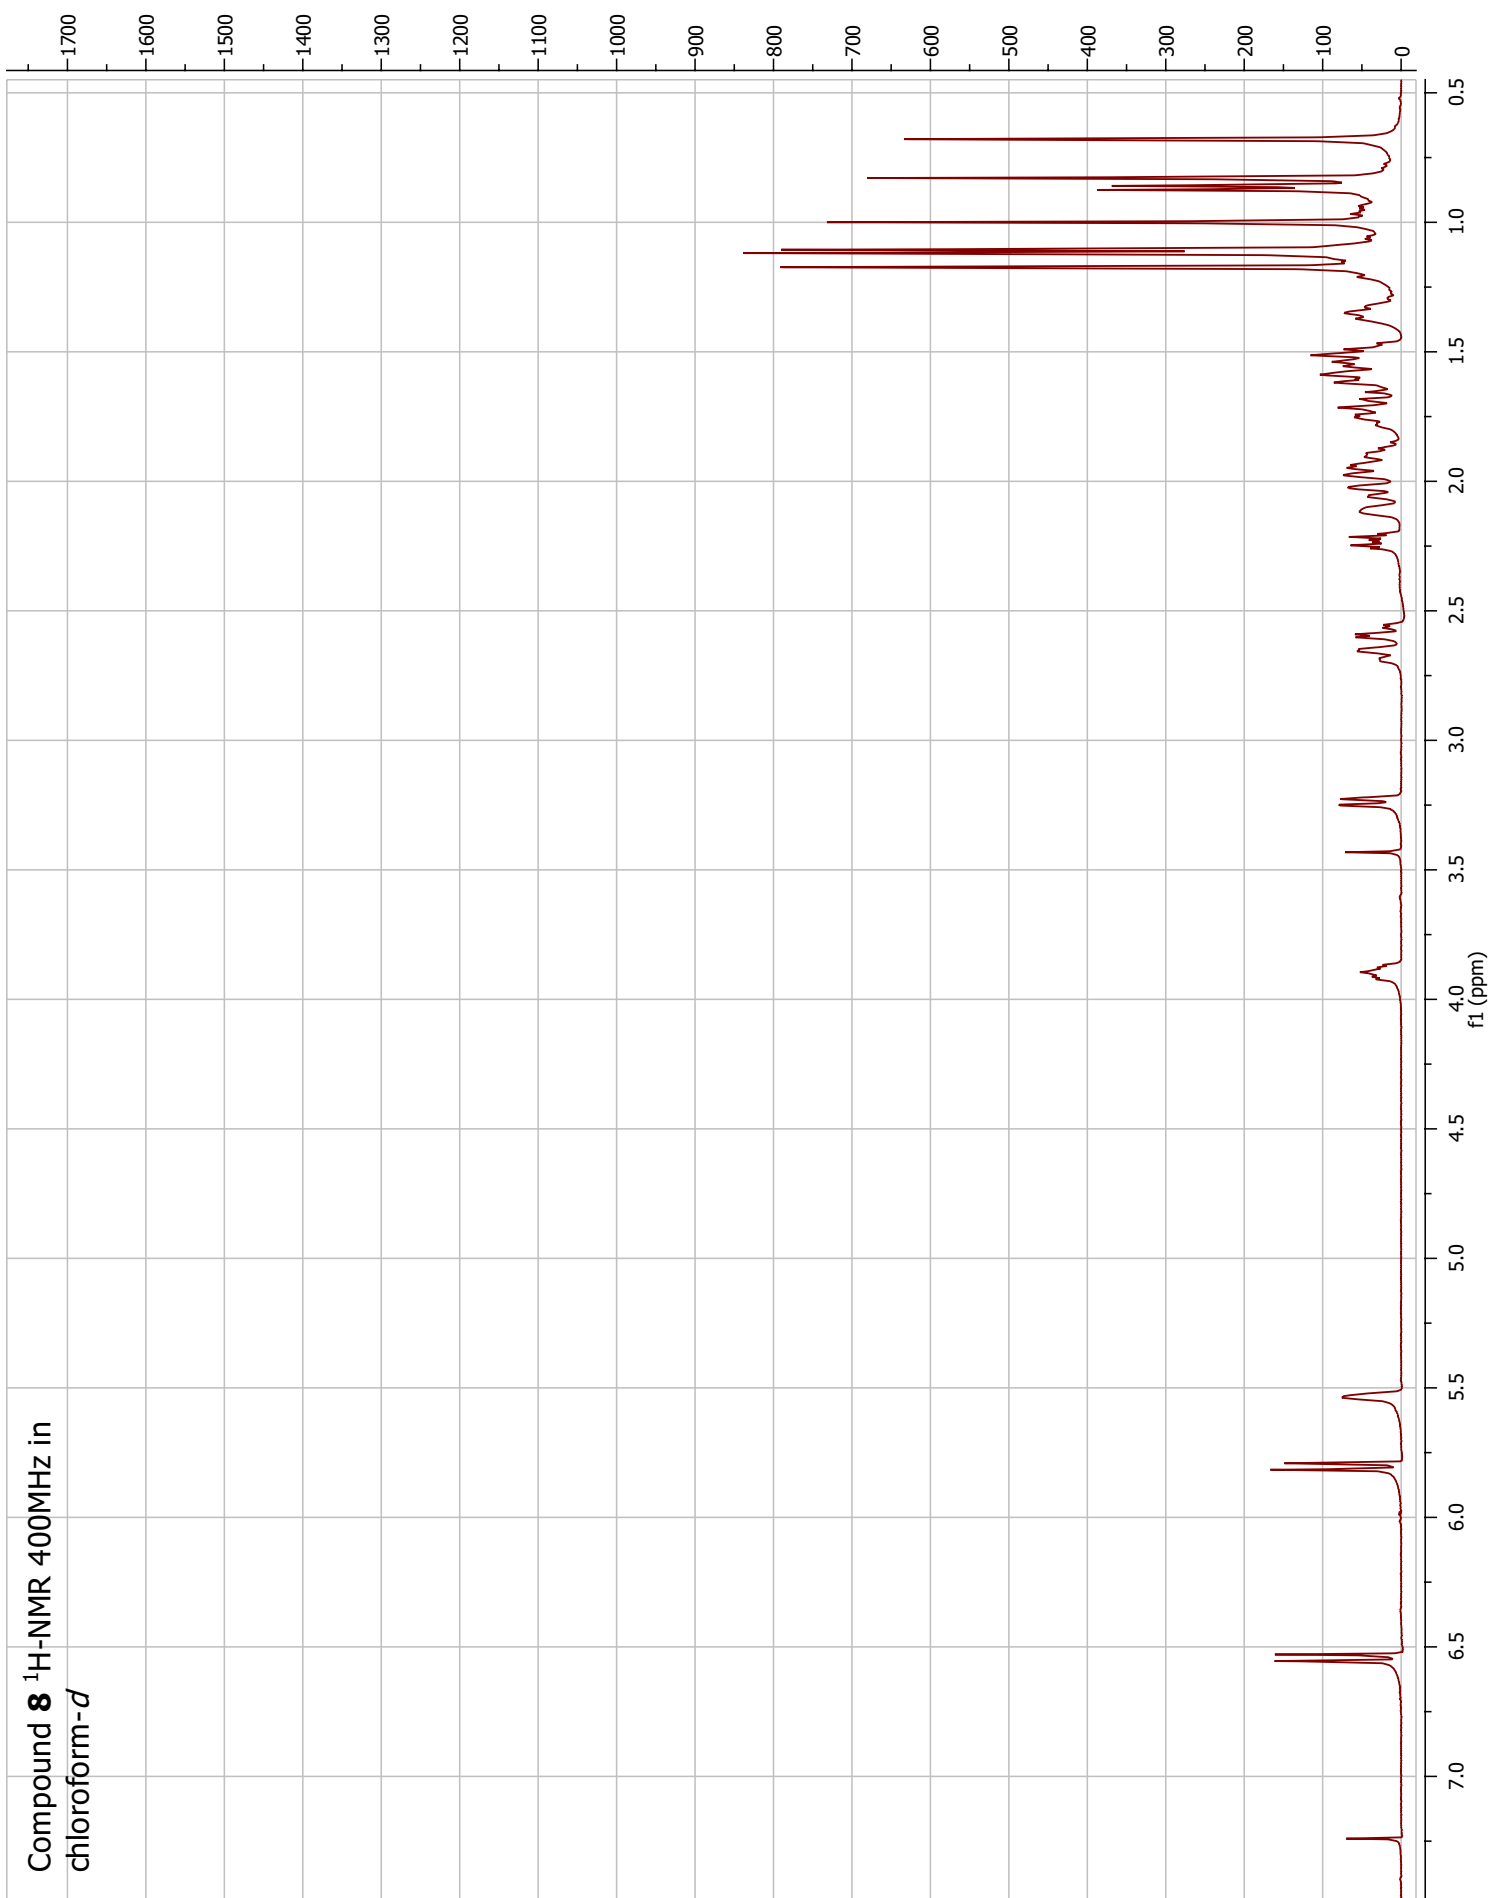

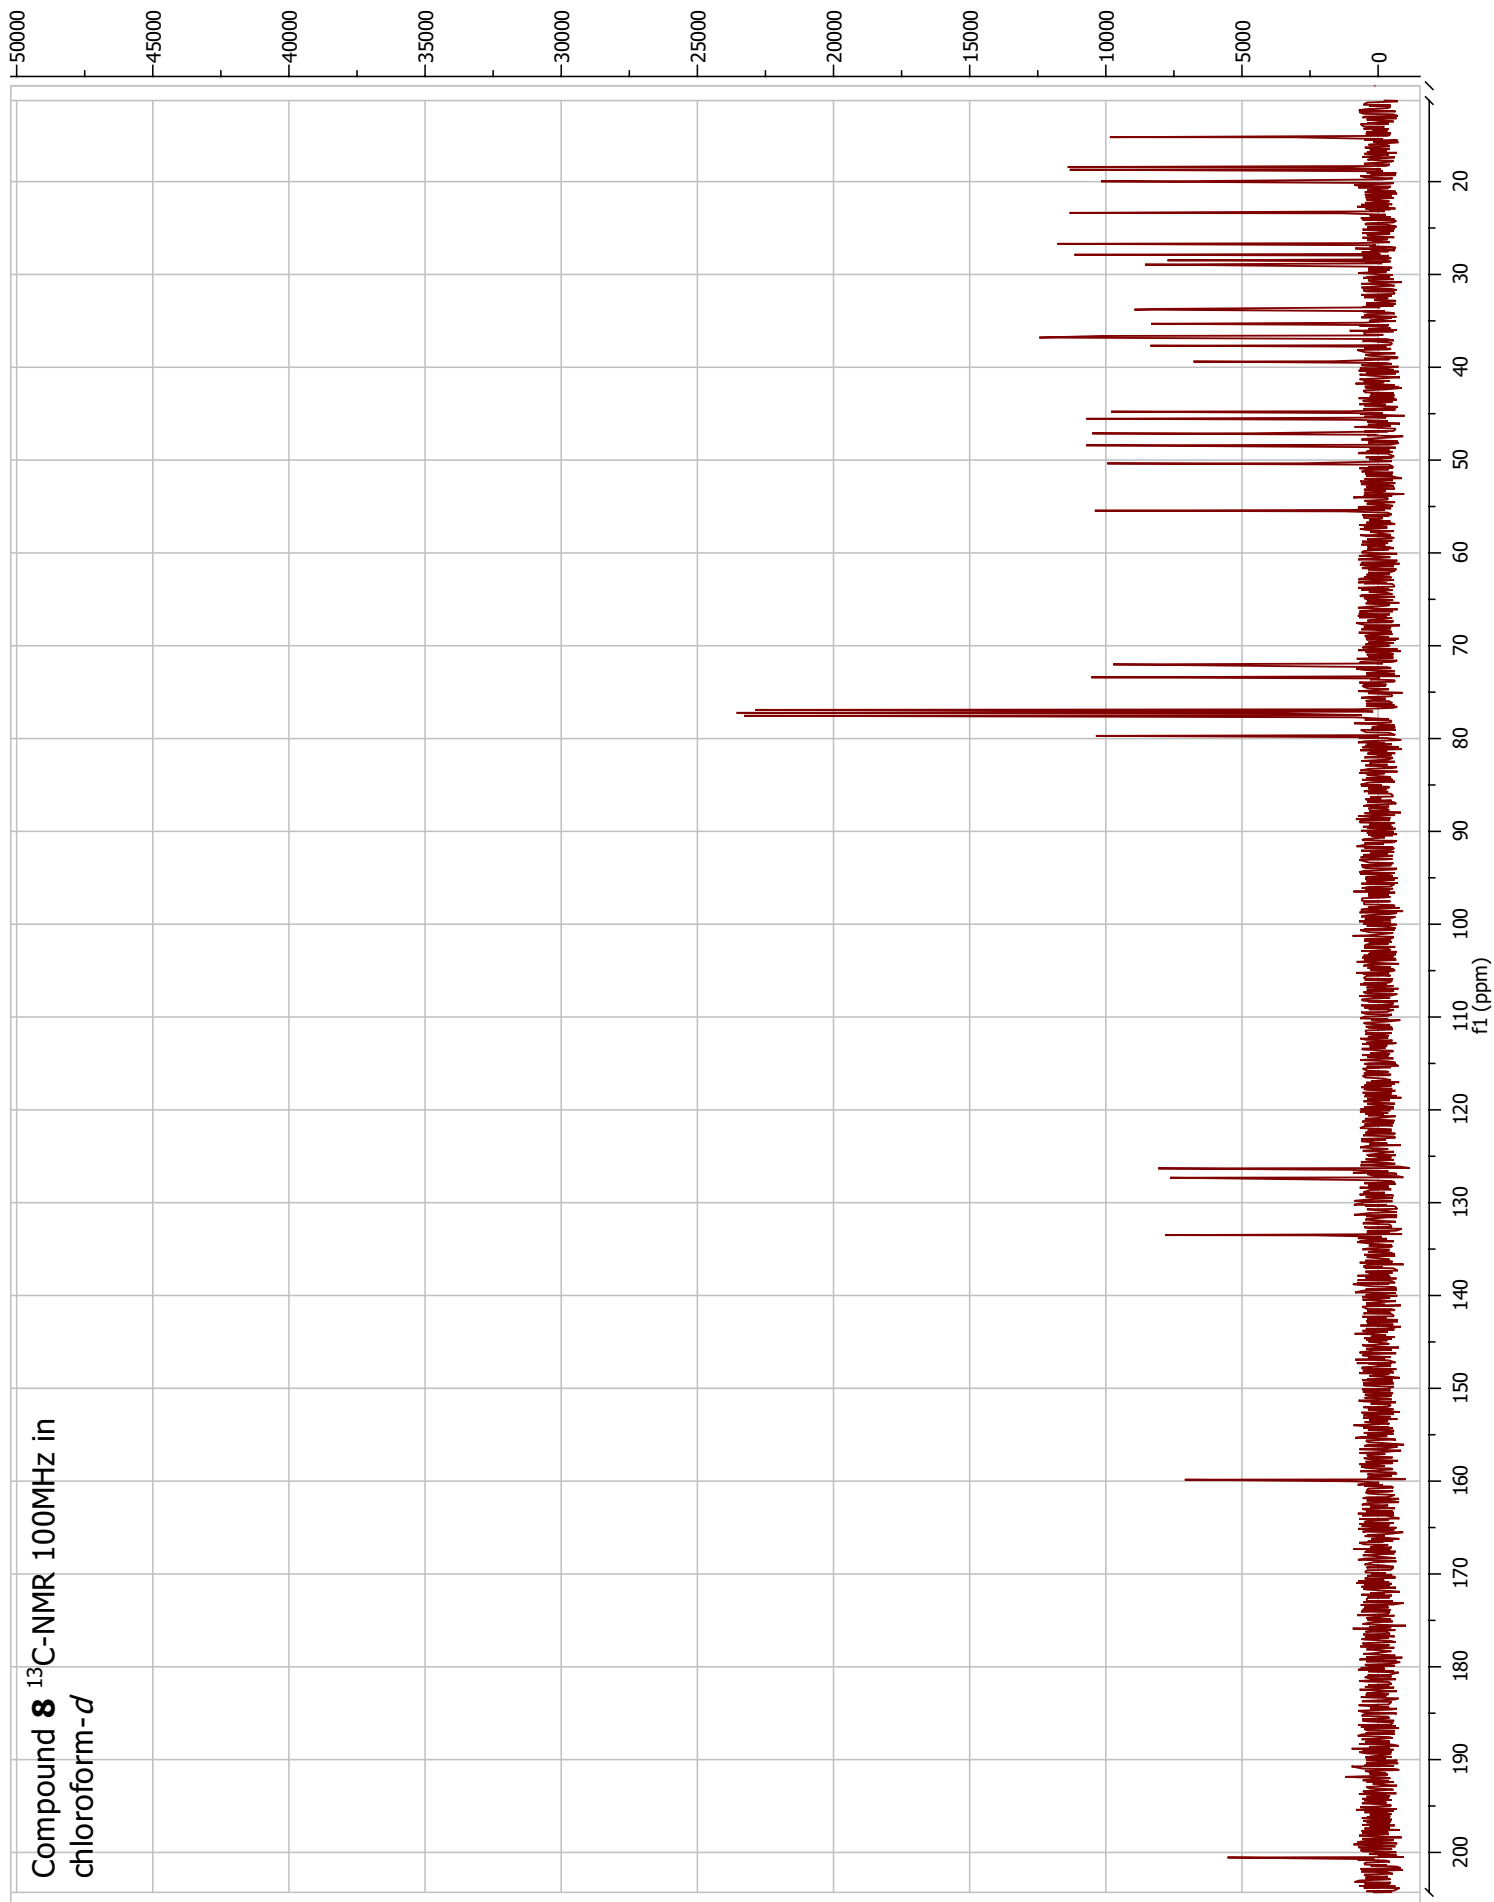

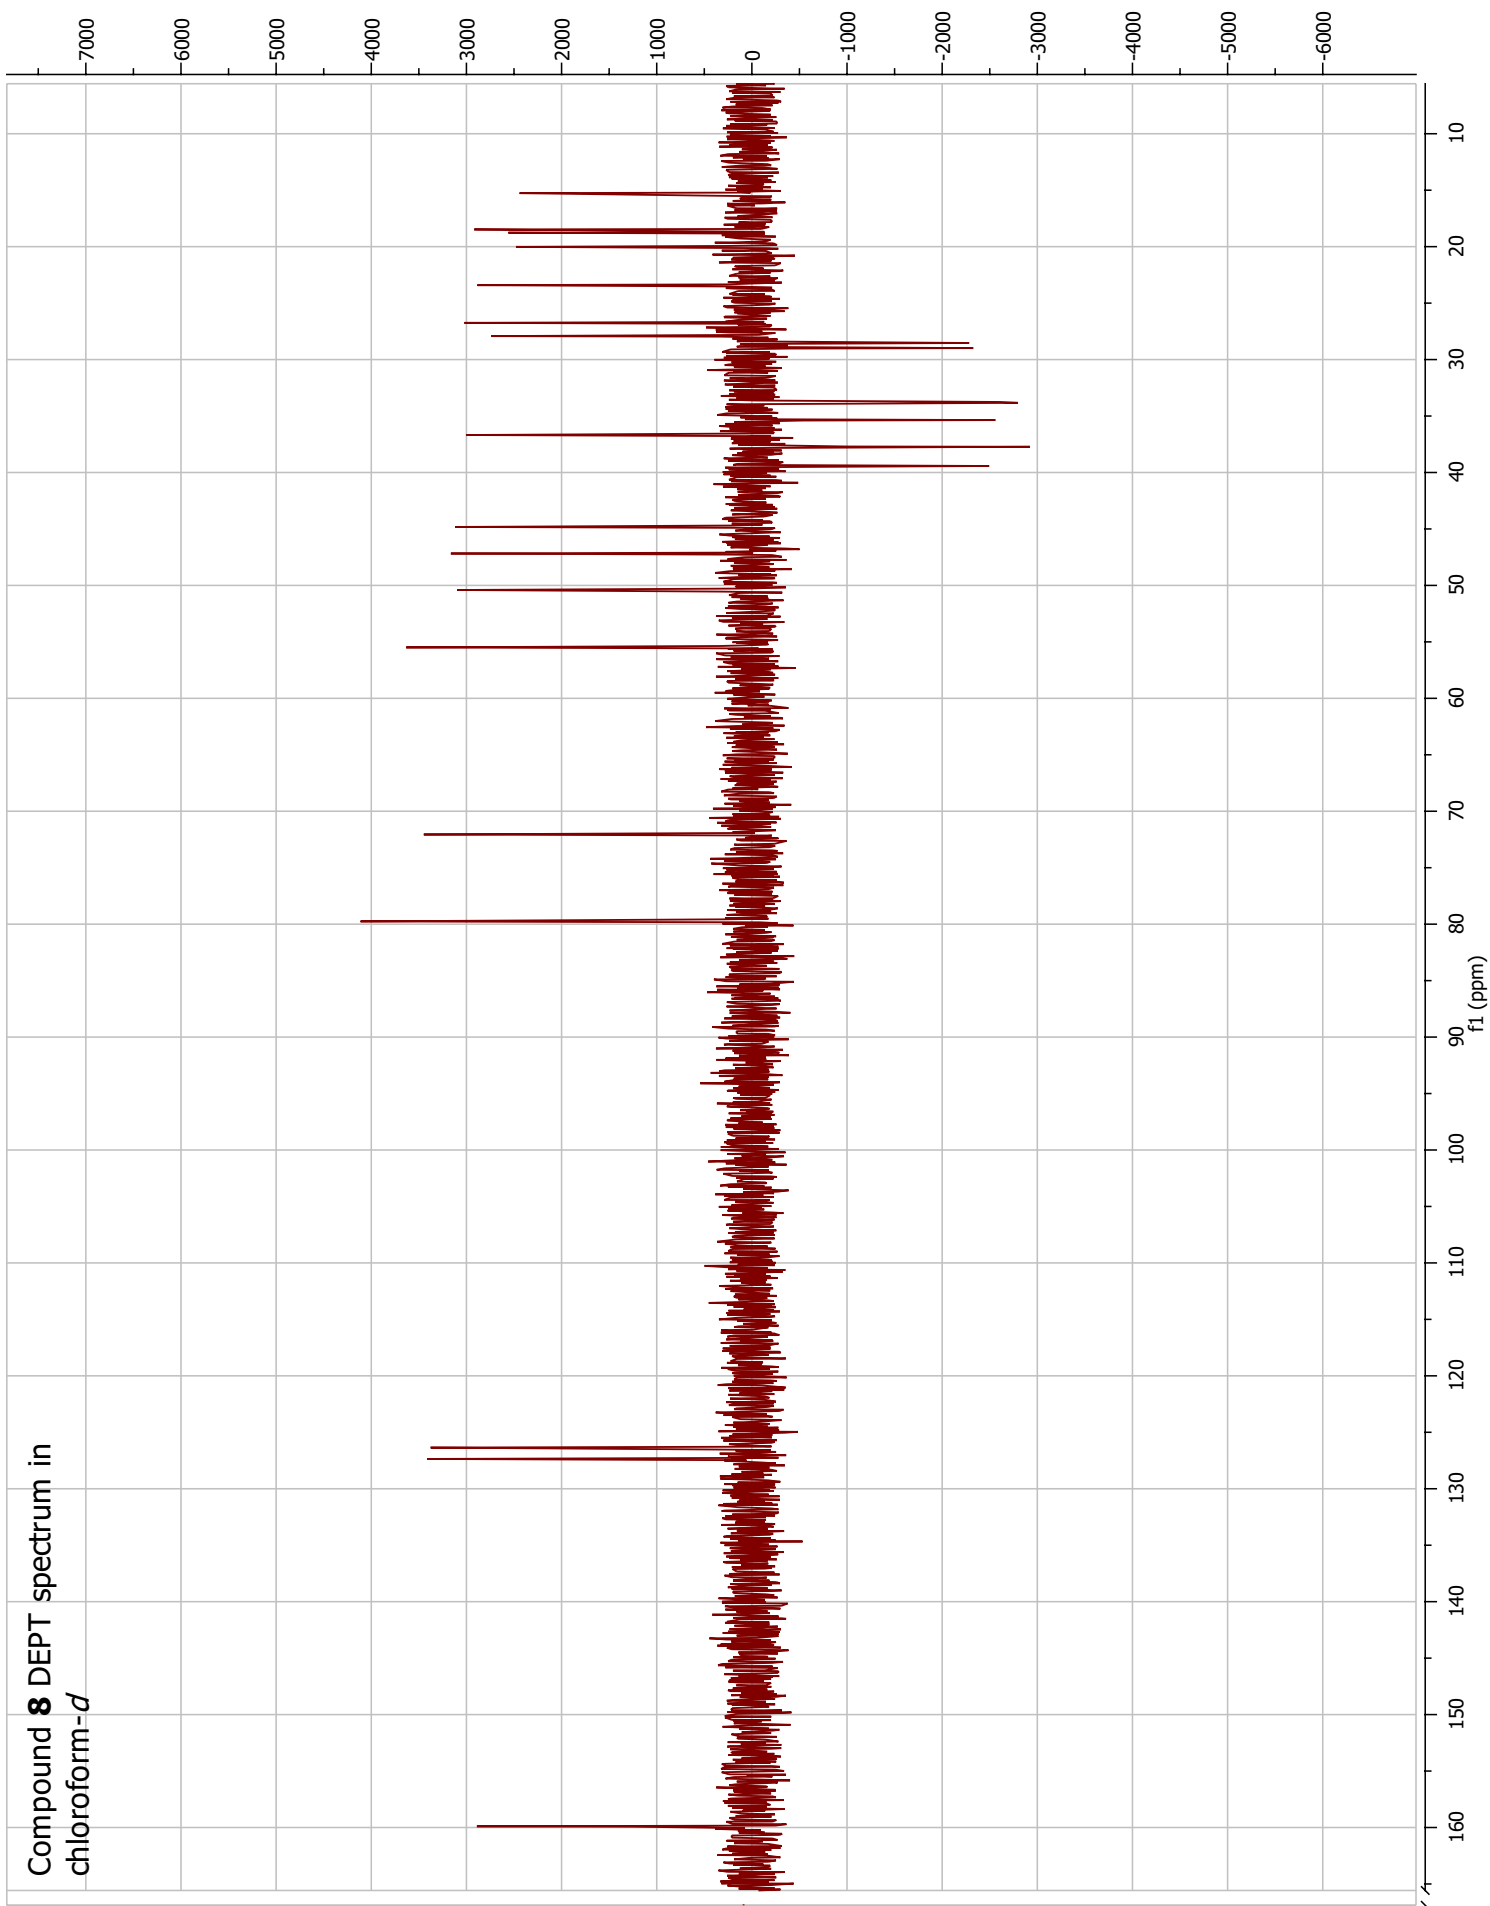

Compound **8** COSY spectrum in  
chloroform-*d*

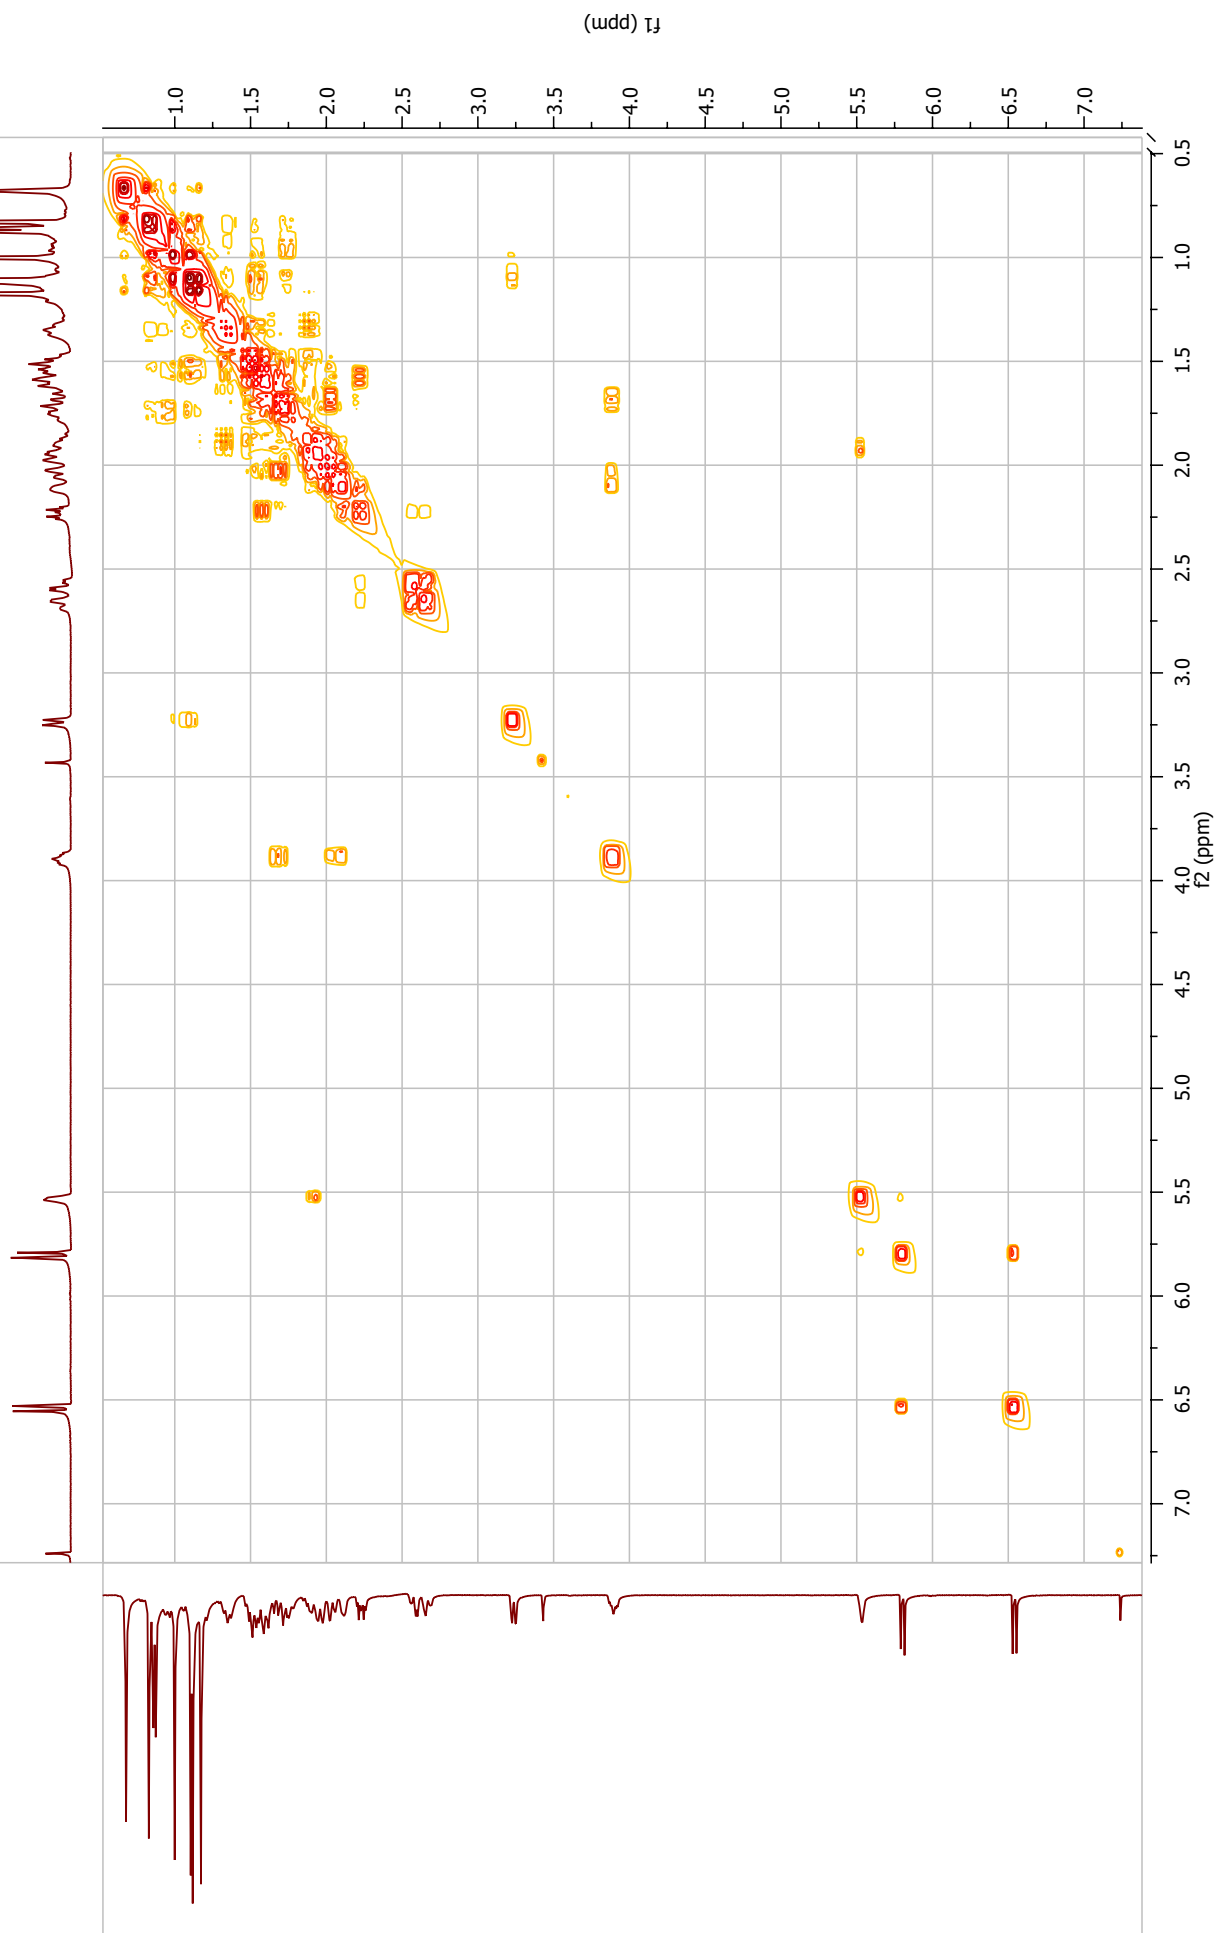

Supplement: NIHMS402686-supplement-Supplementary_data.pdf [file NIHMS402686-supplement-Supplementary_data.pdf]
